1     **Hybridization alters the shape of the genotypic fitness landscape, increasing**  
2             **access to novel fitness peaks during adaptive radiation**

3  
4             Austin H. Patton<sup>1,2</sup>, Emilie J. Richards<sup>1,2</sup>, Katelyn J. Gould<sup>3</sup>, Logan K. Buie<sup>3</sup>, Christopher H.  
5                             Martin<sup>1,2</sup>

6  
7     <sup>1</sup>*Department of Integrative Biology, University of California, Berkeley, CA*

8     <sup>2</sup>*Museum of Vertebrate Zoology, University of California, Berkeley, CA*

9     <sup>3</sup>*Department of Biology, University of North Carolina, Chapel Hill, NC*

10  
11  
12  
13  
14  
15  
16

**Keywords:** fitness landscape; genotypic fitness network; adaptive radiation; introgression;  
standing genetic variation; *de novo* mutation

**Correspondence:** [austinhpatton@berkeley.edu](mailto:austinhpatton@berkeley.edu), [chmartin@berkeley.edu](mailto:chmartin@berkeley.edu)

17 **Abstract**

18 Estimating the complex relationship between fitness and genotype or phenotype (i.e. the adaptive  
19 landscape) is one of the central goals of evolutionary biology. However, adaptive walks connecting  
20 genotypes to organismal fitness, speciation, and novel ecological niches are still poorly understood  
21 and processes for surmounting fitness valleys remain controversial. One outstanding system for  
22 addressing these connections is a recent adaptive radiation of ecologically and morphologically  
23 novel pupfishes (a generalist, molluscivore, and scale-eater) endemic to San Salvador Island,  
24 Bahamas. We leveraged whole-genome sequencing of 139 hybrids from two independent field  
25 fitness experiments to identify the genomic basis of fitness, estimate genotypic fitness networks,  
26 and measure the accessibility of adaptive walks on the fitness landscape. We identified 132 SNPs  
27 that were significantly associated with fitness in field enclosures. Six out of the 13 regions most  
28 strongly associated with fitness contained differentially expressed genes and fixed SNPs between  
29 trophic specialists; one gene (*mettl21e*) was also misexpressed in lab-reared hybrids, suggesting a  
30 potential intrinsic genetic incompatibility. We then constructed genotypic fitness networks from  
31 adaptive alleles and show that scale-eating specialists are the most isolated of the three species on  
32 these networks. Intriguingly, introgressed and *de novo* variants reduced fitness landscape  
33 ruggedness as compared to standing variation, increasing the accessibility of genotypic fitness  
34 paths from generalist to specialists. Our results suggest that adaptive introgression and *de novo*  
35 mutations alter the shape of the fitness landscape, providing key connections in adaptive walks  
36 circumventing fitness valleys and triggering the evolution of novelty during adaptive radiation.

37 **Introduction**

38 First conceptualized by Sewall Wright in 1932, the adaptive landscape describes the complex  
39 relationship between genotype or phenotype and fitness (1). The landscape is a concept, a  
40 metaphor, and an empirical measurement that exerts substantial influence over all evolutionary  
41 dynamics (2–6). Fitness landscapes were originally depicted as high-dimensional networks  
42 spanning genotypic space in which each genotype is associated with fitness (1). Simpson (7)  
43 later described phenotypic evolution of populations through time on a rugged landscape, in  
44 which isolated clusters of fitness peaks represent ‘adaptive zones’ relative to adjacent regions of  
45 low fitness (8). Lande and Arnold formalized the analysis of selection and estimation of  
46 phenotypic fitness landscapes (9–11), leading to empirical studies of fitness landscapes in  
47 numerous systems (12–18). Fitness surfaces are also central components of speciation models  
48 and theory (19–21).

49       A central focus of fitness landscape theory is the characterization of the shape of the  
50 fitness landscape. Theoretical and empirical studies frequently attempt to describe its  
51 topography, such as quantifying the number of fitness peaks, one component of landscape  
52 ruggedness that affects the predictability of evolution (5, 22–24). Importantly, the existence of  
53 multiple peaks and valleys on the fitness landscape implies epistasis for fitness, or non-additive  
54 effects on fitness resulting from genotypic interactions (23, 25–28). Fitness epistasis reduces the  
55 predictability of evolution because the resultant increase in the number of peaks increases the  
56 number of viable evolutionary outcomes (8, 29). Increasing fitness epistasis also increases  
57 landscape ruggedness, thus reducing the probability of converging on any one fitness peak and  
58 ultimately diversifying potential evolutionary outcomes (8, 30).

*Hybridization alters the fitness landscape*

59           This leads to a fundamental concept in fitness landscape theory: Not all genotypic  
60 pathways are evolutionarily accessible (5, 26, 31–36). In large populations, paths through  
61 genotype space that monotonically increase in fitness at each mutational step are favored over  
62 alternatives with neutral or deleterious steps (37). These accessible genotypic paths can be  
63 considered adaptive walks under Fisher’s geometric model, by which adaptation proceeds  
64 towards a phenotypic optimum via additive mutations of small phenotypic effect (37, 38). On  
65 rugged landscapes as originally envisioned by Wright (23), greater numbers of peaks (i.e. the  
66 ruggedness) increase the mean length of potential adaptive walks to any one fitness optimum,  
67 while decreasing the length of accessible paths to the nearest peak. Ultimately, this leads to a  
68 decrease in the probability that any one fitness optimum is reached. Simultaneously, increasing  
69 landscape ruggedness decreases the length of adaptive walks to the nearest local optimum, owing  
70 to the corresponding increase in peak density.

71           There are a growing number of experimental studies of adaptive walks in nature,  
72 including the evolution of toxin resistance in monarch butterflies (39), alcohol tolerance in  
73 *Drosophila* (40, 41), and host-shift in aphids (42). Likewise, the accessibility of genotypic fitness  
74 networks has now been explored in numerous microbial systems, including the evolution of  
75 antibiotic resistance (31), metabolism (43), citrate exploitation (44), and glucose limitation in *E.*  
76 *coli* (45), and adaptation to salinity in yeast via evolution of heat shock protein *Hsp90* (22).  
77 However, these studies are still limited to the investigation of specific coding substitutions and  
78 their effects on fitness in laboratory environments. Nosil et al. (46) estimated genotypic fitness  
79 networks for *Timema* stick insects based on a field experiment. Similarly, this study focused on a  
80 single large-effect locus underlying dimorphic coloration between ecotypes. These studies  
81 represent significant advances, but extension of fitness landscape theory to empirical systems

*Hybridization alters the fitness landscape*

82 including multiple species remains an underexplored area of future research at the intersection of  
83 micro- and macroevolution. Such studies can provide insight into the topography of fitness  
84 landscapes in natural systems, the accessibility of interspecific adaptive walks, and ultimately the  
85 predictability of evolution.

86         One promising system for estimating fitness landscapes is a recent adaptive radiation of  
87 *Cyprinodon* pupfishes endemic to San Salvador Island, Bahamas (17, 18, 47, 48). This radiation  
88 is comprised of two trophic specialists, a molluscivore (durophage: *Cyprinodon brontotheroides*)  
89 and a scale-eater (lepidophage: *C. desquamator*), derived from a Caribbean-wide generalist (*C.*  
90 *variegatus*) which also coexists in the same habitats. These three species all occur in sympatry in  
91 the hypersaline lakes of San Salvador Island, Bahamas (Fig 1a). Found in the benthic littoral  
92 zone of each lake, all three species forage within the same benthic microhabitat; indeed, no  
93 habitat segregation has been observed in 14 years of field studies. Originating less than 10,000  
94 years ago (based on geological age estimates for the lakes: (49)), the functional and trophic  
95 novelty harbored within this radiation is the product of exceptional rates of craniofacial  
96 morphological evolution (50–53). Furthermore, species boundaries persist across multiple lake  
97 populations, despite persistent admixture among species (54, 55). We previously estimated  
98 fitness landscapes in these hypersaline lakes from two independent field experiments measuring  
99 the growth and survival of hybrids placed in field enclosures (Figure 1b). Selection analyses  
100 revealed a multi-peaked phenotypic fitness landscape that is stable across lake populations, year  
101 of study, and manipulation of the frequency of rare hybrid phenotypes (17, 18, 48)). One of the  
102 strongest and most persistent trends across studies and treatments was that hybrid phenotypes  
103 resembling the scale-eater were isolated in the lowest fitness region for both growth and survival  
104 relative to the other two species (17, 18). In contrast, hybrids resembling the generalist occupied

*Hybridization alters the fitness landscape*

105 a fitness peak and were separated by a smaller fitness valley from hybrids resembling the  
106 molluscivore, which occurred on a second peak of higher fitness.

107 Evolutionary trajectories through regions of low fitness should be inaccessible to natural  
108 selection. How then did an ancestral generalist population cross these phenotypic fitness valleys  
109 to reach new fitness peaks and adapt to novel ecological niches? A growing theoretical and  
110 empirical literature on fitness landscapes has demonstrated the limited conditions for crossing  
111 fitness valleys (56–59). Fitness peaks and valleys in morphospace may result only from the  
112 reduction of the adaptive landscape to two phenotypic dimensions (60). Additional phenotypic  
113 and genotypic dimensions may reveal fitness ridges that entirely circumvent fitness valleys (48,  
114 61, 62). Indeed, owing to nonlinearity in the association between phenotype and fitness (63, 64),  
115 even a single-peaked phenotypic fitness landscape may be underlaid by a multi-peaked genotypic  
116 fitness landscape (65, 66). In this respect, investigating the high-dimensional genotypic fitness  
117 landscape is key to understanding the origins of novelty in this system, particularly given the rare  
118 evolution of lepidophagy (scale-eating), a niche occupied by less than 0.3% of all fishes (67).

119 Furthermore, the relative contributions of standing genetic variation, *de novo* mutations,  
120 and adaptive introgression to the tempo and mode of evolution are now of central interest to the  
121 field of speciation genomics (68–72). The three-dimensional adaptive landscape metaphor is  
122 often invoked to explain how the genetic, phenotypic, and ecological diversity introduced to  
123 populations by hybridization facilitates the colonization of neighboring fitness peaks that are  
124 unoccupied by either hybridizing species (73–75). However, extension of these ideas to more  
125 high-dimensional genotypic fitness landscapes remains underexplored. For instance, we have yet  
126 to learn how the appearance of novel adaptive genetic variation through introgressive  
127 hybridization or *de novo* mutation alters the realized epistatic interactions among loci, thus

Hybridization alters the fitness landscape

128 potentially altering the shape of the fitness landscape and the accessibility of interspecific  
 129 adaptive walks.

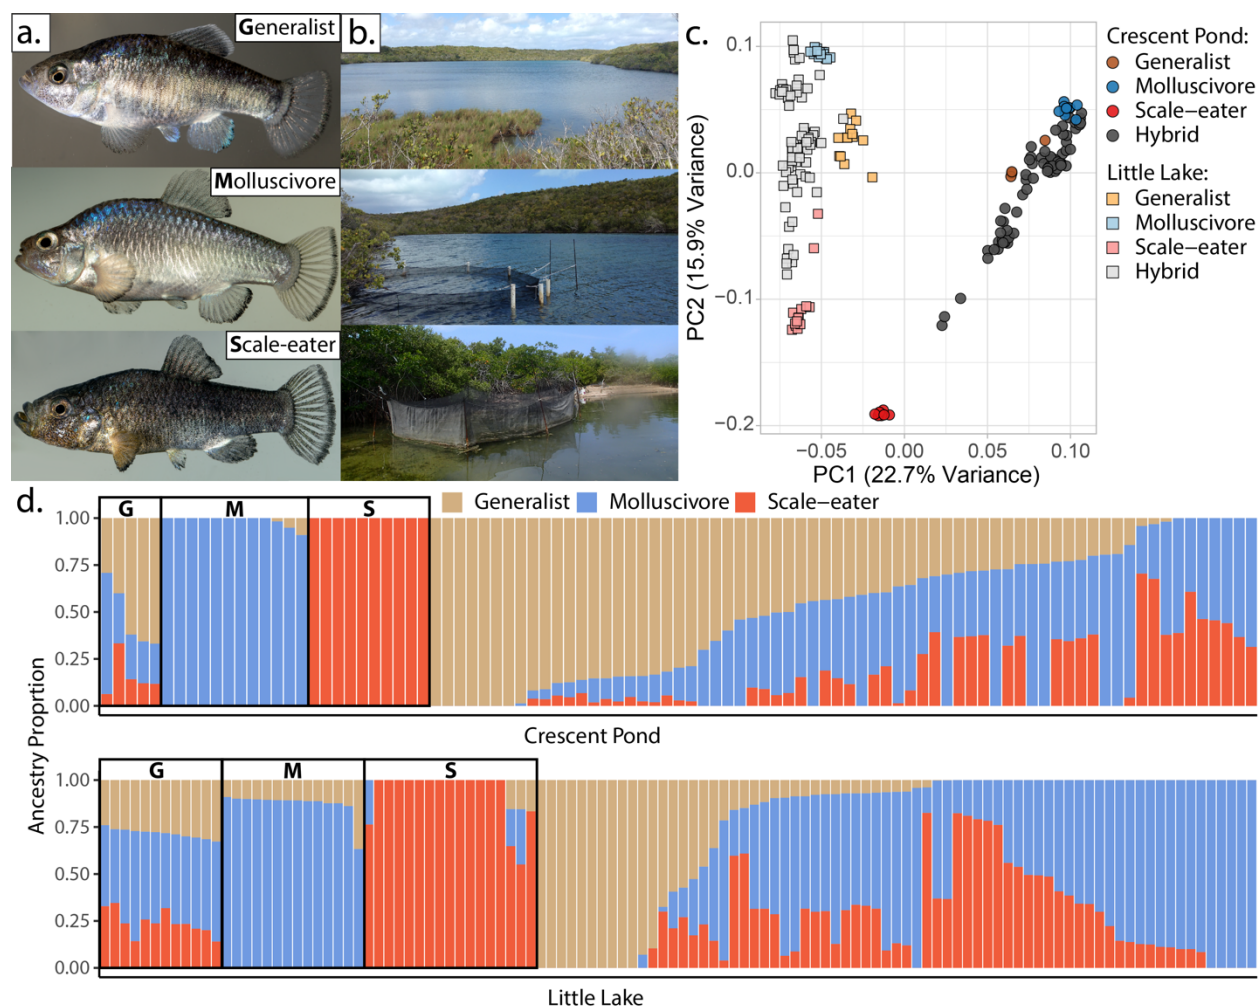

130  
 131 **Figure 1. San Salvador Island pupfishes and their hybrids.** a. From top to bottom: the generalist,  
 132 *Cyprinodon variegatus*, the molluscivore *C. brontotheroides*, and the scale-eater *C. desquamator*. b.  
 133 Representative images of experimental field enclosures. c. Principal component analysis of 1,129,771 LD-  
 134 pruned SNPs genotyped in hybrids and the three parental species. d. Unsupervised ADMIXTURE analyses  
 135 for Crescent Pond (top) and Little Lake (bottom). G, M and S indicate individual samples of Generalists  
 136 (G), Molluscivores (M), and Scale-eaters (S), respectively, followed by all resequenced hybrid individuals  
 137 from field experiments. Colors indicate ancestry proportions in each population ( $K = 3$ ).

138 The adaptive radiation of San Salvador Island pupfishes, like many others (76–80),  
 139 appears to have originated from a complex interplay of abundant standing genetic variation,  
 140 adaptive introgression from neighboring islands, and several *de novo* single-nucleotide mutations  
 141 and deletions found only in the scale-eater (55, 81). Notably, both specialists harbor numerous

*Hybridization alters the fitness landscape*

142 introgressed SNPs showing evidence of hard selective sweeps in the regulatory regions of known  
143 craniofacial genes (55, 81). In contrast, hard selective sweeps of *de novo* mutations only appear  
144 in the scale-eating species, *C. desquamator*. Here, we leverage whole genome sequencing of 139  
145 hybrids measured in field experiments to identify the genomic basis of fitness differences, infer  
146 genotypic fitness networks, summarize their topography, and quantify the accessibility of novel  
147 fitness peaks and the influence of each source of genetic variation on interspecific adaptive  
148 walks.

149

150 **Results**

151 *Sample collection and genomic resequencing*

152 We resequenced 139 hybrids (86 survivors, 56 deaths (Appendix 1—table 1)) from two  
153 independent field experiments across a total of six field enclosures and two lake populations  
154 (2011: two high-density 3 m diameter enclosures exposed for three months: Crescent Pond  $n =$   
155 796; Little Lake  $n = 875$  F2 hybrids (17); 2014/2015: four high-density 4 m diameter enclosures  
156 exposed for three months in Crescent Pond,  $n = 923$  F4/F5 hybrids and eleven months in Little  
157 Lake,  $n = 842$  F4/F5 hybrids (18)). We then characterized patterns of genetic variation among  
158 parental species in each lake and their lab-reared hybrids used in field experiments. We  
159 genotyped 1,129,771 SNPs with an average coverage of 9.79x per individual.

160

161 *Population structure and ancestry associations with fitness*

162 Principal components analysis (PCA) of genetic variation strongly differentiated pupfishes  
163 sampled from Little Lake/Osprey Lake and Crescent Pond (PC1: 22.7% variance explained) and  
164 among species within each lake (PC2: 15.9% variance explained: Figure 1d; Figure 1—figure  
165 supplement 1-2). These results were supported by ADMIXTURE analyses (82, 83) (Figure 1e).



*Hybridization alters the fitness landscape*

166 However, some hybrids were genotypically transgressive, falling outside the genotypic  
167 distributions of the three parental species (Figure 1—figure supplement 2), leading  
168 ADMIXTURE to assign the third cluster to these hybrids, rather than generalists which often  
169 contain segregating variation found in trophic specialists (67). This pattern persisted in a  
170 supervised ADMIXTURE analysis, in which we assigned individuals from the three parental  
171 species *a priori* to their own population and estimated admixture proportions for the remaining  
172 hybrids (Figure 1—figure supplement 3). Pairwise genetic distances did not predict pairwise  
173 morphological distances (Figure 1—figure supplement 4).

174 We analyzed three measures of fitness (growth, survival, and their composite: see  
175 Methods and Supplement for details), but focus herein on composite fitness, which is equal to  
176 growth for survivors and zero for non-survivors. Growth could not be measured for tagged  
177 hybrids that died in field enclosures and thus were not recovered. Because reproductive success  
178 was not possible to quantify in field experiments (due to continuous egg-laying and very small,  
179 newly hatched fry), composite fitness included only measurements of growth and survival.

180 Interestingly, in no case were genome-wide patterns of parental ancestry in hybrids  
181 (estimated from unsupervised ADMIXTURE analyses) associated with hybrid composite fitness  
182 (generalist  $P = 0.385$ ; scale-eater  $P = 0.439$ ; molluscivore  $P = 0.195$ ), growth (generalist  $P =$   
183  $0.119$ ; scale-eater  $P = 0.283$ ; molluscivore  $P = 0.328$ ), or survival probability (generalist  $P =$   
184  $0.440$ ; scale-eater  $P = 0.804$ ; molluscivore  $P = 0.313$ ) while controlling for effects of lake and  
185 experiment (Figure 1—figure supplement 5; Appendix 1—table 2). Similar results were obtained  
186 when repeating these analyses using admixture proportions estimated from a supervised  
187 ADMIXTURE analysis (Appendix 1—table 3), using only samples from the second field  
188 experiment (Appendix 1—table 4), or using principal component axes estimated from genome-

189 wide SNPs (Appendix 1—table 5: See Supplementary Results). Therefore, in contrast to  
 190 previous studies (84–86), in this system genome-wide ancestry is not consistently associated  
 191 with fitness, highlighting the complex nonlinear relationship between genotype, phenotype, and  
 192 fitness within this nascent adaptive radiation. We must look to local ancestry to understand  
 193 fitness relationships (e.g. (87)).

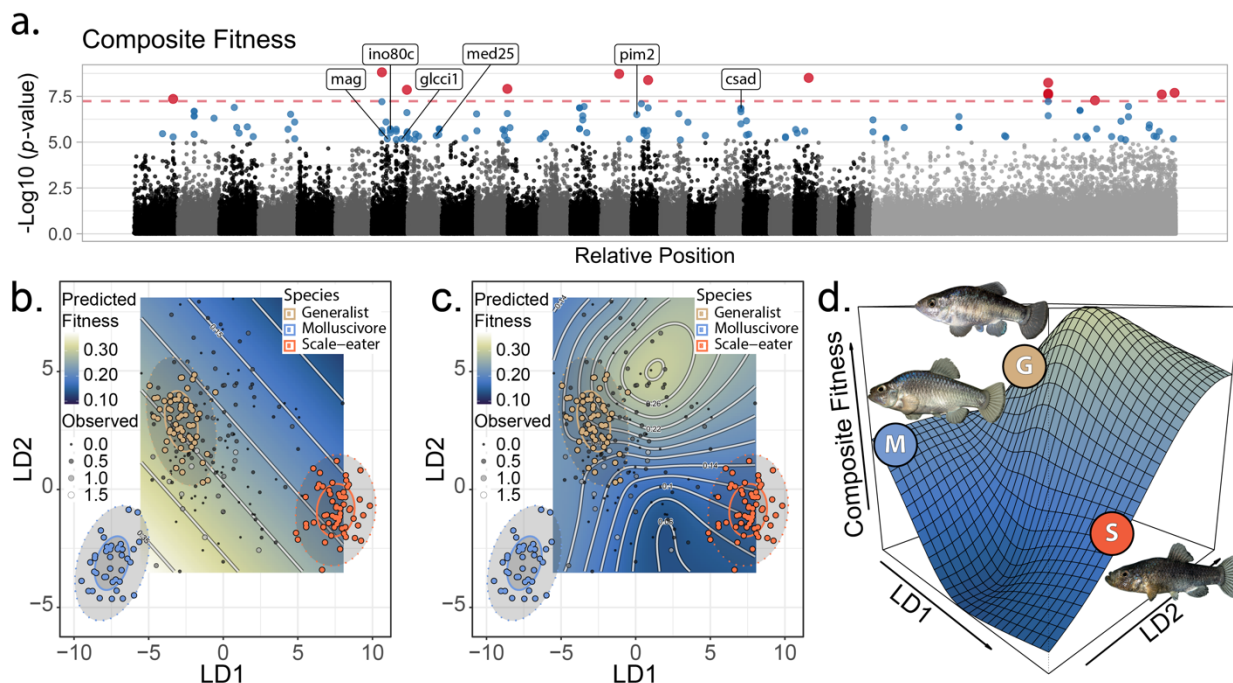

194  
 195 **Figure 2. The genetic basis of fitness variation and improved inference of adaptive landscapes.** **a)** Per-  
 196 SNP log<sub>10</sub> *p*-values from a genome-wide association test with GEMMA for composite fitness (survival x  
 197 growth). Lake and experiment were included as covariates in the linear mixed model. SNPs that were  
 198 significant at FDR < 0.05 are indicated in blue; red SNPs above dashed red line cross the threshold for  
 199 Bonferroni significance at  $\alpha = 0.05$ . The first twenty-four scaffolds are sorted from largest to smallest and  
 200 remaining scaffolds were pooled. The six genes associated with composite fitness which were both strongly  
 201 differentiated ( $F_{ST} > 0.95$ ) and differentially expressed between specialists (88) are annotated. **b-c)** Best-fit  
 202 adaptive landscape for composite fitness using either morphology alone (**b**: flat surface with only  
 203 directional selection) or morphology in combination with fitness-associated SNPs (**c**: highly nonlinear  
 204 surface). Best-fit model in **c** was a generalized additive model (GAM) including a thin-plate spline for both  
 205 LD axes, fixed effects of experiment and lake, and fixed effects of the seven (see supplementary methods)  
 206 SNPs most strongly associated with fitness shown in red in panel **a**. **d)** Three-dimensional view of **c** with  
 207 relative positions of the three parental phenotypes indicated.

208 *Genome-wide association mapping of fitness*

209 From our LD-pruned dataset we used a linear mixed model in GEMMA to identify 132 SNPs in  
210 regions that were strongly associated with composite fitness, including 13 which remained  
211 significant at the conservative Bonferroni-corrected threshold (Figure 2a, Appendix 1—table 6-  
212 7; see supplement for results for survival and growth alone [Appendix 1—table 8-9; Figure 2—  
213 figure supplement 1]). Gene ontologies for these 132 fitness-associated regions were  
214 significantly enriched for synaptic signaling and chemical synaptic transmission [False discovery  
215 rate (FDR) rate < 0.01; Figure 2—figure supplement 2; Appendix 1—table 7]. Ontologies  
216 enriched at an FDR rate < 0.05 were related to signaling and regulation of cell communication  
217 (for growth, see Figure 2—figure supplement 3). We did not identify any enrichment for  
218 ontologies related to craniofacial development which have previously been identified to play a  
219 significant role in the adaptive divergence of these fishes (55, 81, 88). This suggests that fitness-  
220 associated regions in our field experiments captured additional components of fitness beyond the  
221 external morphological phenotypes measured in previous studies.

222 We characterized whether genes in or near fitness-associated regions were implicated in  
223 adaptive divergence of the specialists. Surprisingly, no fitness-associated regions overlapped  
224 with regions showing significant evidence of a hard selective sweep (55). However, six fitness-  
225 associated genes were previously shown to contain either fixed divergent SNPs (*csad*, *glcci1*,  
226 *ino80c*, *mag*, *pim2*, *mettl21e*), or a fixed deletion between specialists (*med25*) (88). *Med25*  
227 (Mediator Complex Subunit 25) is a craniofacial transcription factor associated with cleft palate  
228 in humans and zebrafish (89, 90); a precursor of *mag* (Myelin Associated Glycoprotein) was also  
229 associated with the parallel evolution of the thick-lipped phenotype in Midas cichlids based on  
230 differential expression among morphs (91). Three of the six remaining fitness-associated genes

*Hybridization alters the fitness landscape*

231 containing divergent SNPs (88) were associated with growth and/or body size measurements in  
232 other fishes. First, *csad* plays an important role in synthesizing taurine which is a rate-limiting  
233 enzyme affecting growth rate in parrotfishes (92), rainbow trout (93), and Japanese flounder  
234 (94). Second, *glcci1* is associated with the body depth/length ratio in yellow croaker (95). Third,  
235 *ino80c* is associated with measures of body size in Nile tilapia (96). Finally, *mettl21e* was  
236 differentially expressed among specialists and also misexpressed in F1 hybrids between scale-  
237 eaters and molluscivores at eight days post-fertilization and thus is a putative genetic  
238 incompatibility in this system that may impact their fitness in field enclosures (88, 97). Although  
239 it has not been associated with growth or body size in fishes, *mettl21e* is associated with  
240 intramuscular fat deposition in cattle (98). Taken together, these findings support the  
241 interpretation that fitness-associated regions are associated with unmeasured traits, particularly  
242 physiological growth rate, or craniofacial shape in the case of the deletion in *med25*, that affect  
243 fitness in our hybrid field experiments. However, the fitness associated loci we identified appear  
244 not to have the subject of selective sweeps in either specialist.

245

246 *Fitness-associated SNPs improve inference of the adaptive landscape*

247 Fitness landscapes in past studies were estimated using slightly different sets of morphological  
248 traits; thus, to enable inclusion of all hybrids on a single fitness landscape, a single observer  
249 (AHP) remeasured all sequenced hybrids for 31 morphological traits (Figure 2—figure  
250 supplement 4; Appendix 1—table 10). We used linear discriminant axes and generalized additive  
251 modelling (GAM) to estimate phenotypic fitness landscapes for the sequenced hybrids on a two-  
252 dimensional morphospace indicating similarity to each of the three parental populations  
253 following previous studies (17, 18)(Figure 2—figure supplements 5; Appendix 1—table 11-13).

*Hybridization alters the fitness landscape*

254 We then tested whether the inclusion of the 13 genomic regions most strongly associated with  
255 fitness (red: Figure 2a) in GAM models improved our inference of the underlying adaptive  
256 landscape. Models including fitness-associated SNPs were invariably favored over models with  
257 external morphology alone ( $\Delta AICc > 8.6$ : Appendix 1—table 14-15). Morphology-only models  
258 predicted a flat fitness surface (Figure 2b, Figure 2—figure supplement 6; predictions restricted  
259 to observed hybrid morphospace). In contrast, models including fitness-associated SNPs  
260 predicted a complex and nonlinear fitness landscape, despite our limited dataset of 139  
261 sequenced hybrids relative to samples in previous morphology-only studies of around 800  
262 hybrids per enclosure.

263       To reduce complexity of the full model estimated from 31 morphological traits including  
264 all 13 fitness-associated SNPs, we fit an additional model including only the seven most  
265 significant fitness-associated SNPs in the full model. This reduced model was the best-fit; the  
266 inferred adaptive landscape was complex and characterized by a fitness peak near hybrids  
267 resembling the generalist phenotype separated by a small fitness valley from a second region of  
268 high fitness for hybrids resembling the molluscivore phenotype. Hybrids resembling the scale-  
269 eater phenotype again occurred in a large fitness valley (Figure 2b-2d: For results pertaining to  
270 growth or survival see Appendix 1: Figure 2—figure supplement 6, Appendix 1—table 11-15).  
271 Each of these fitness peaks and valleys were frequently recovered across 10,000 bootstrap  
272 replicates; landscapes inferred from bootstrap replicates were often more complex with increased  
273 curvature relative to inferences from our observed dataset (Figure 2—figure supplement 7).  
274 Thus, the fitness landscape estimated from our observed dataset appears robust to sampling  
275 uncertainty.

Hybridization alters the fitness landscape

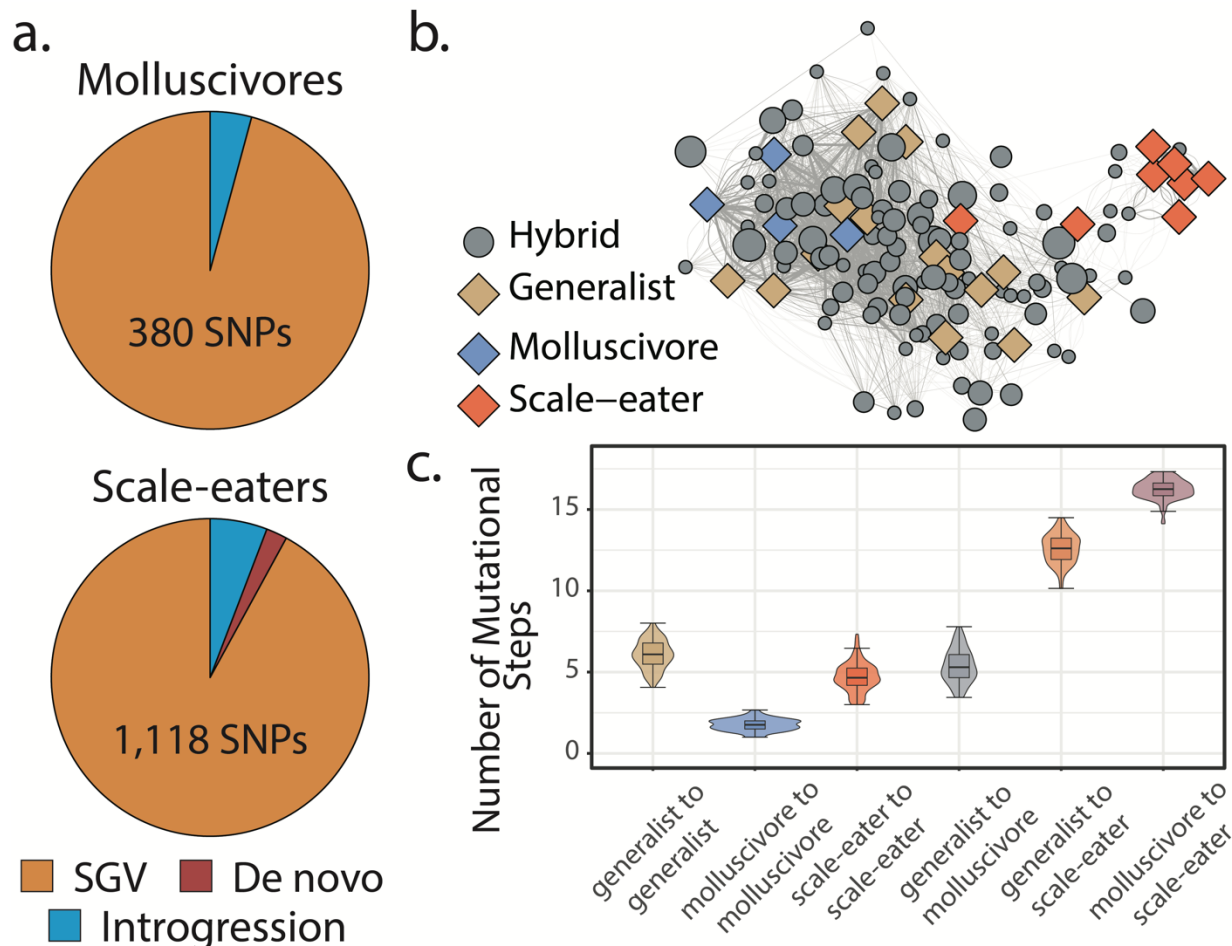

276  
277 **Figure 3. Scale-eaters are isolated on the fitness landscape.** **a.** Most nearly fixed or fixed variants ( $F_{ST} \geq 0.95$ ) experiencing hard selective sweeps (hereafter ‘adaptive alleles’) originated as standing genetic variation (SGV: molluscivores = 96%, scale-eaters = 92%), followed by introgression (molluscivores = 4%, scale-eaters = 6%), and *de novo* mutation (scale-eaters = 2%)(55). Pie charts show adaptive alleles retained in our study for each species; networks are constructed from either set of adaptive alleles. **b.** Genotypic network constructed from a random sample of ten SNPs, sampled from all SNPs shown in **a.** Each edge between nodes is up five mutational steps away; edge width is proportional to mutational distance: wider edges connect closer haplotypes; hybrid node size is proportional to fitness (larger nodes are of greater fitness value). **c.** Median number of mutational steps within or between species (e.g. Figure 4a). All pairwise comparisons using Tukey’s HSD test (after FDR correction) were significant.

287 Compared to previous studies, the highest fitness optimum was shifted from the  
288 molluscivore to the generalist phenotype. This suggests that fitness-associated SNPs increased  
289 the fitness of hybrids resembling generalists beyond expectations based on their morphology  
290 alone, consistent with the hypothesis that fitness-associated SNPs are associated with  
291 unmeasured non-morphological traits affecting fitness. Indeed, visualization of observed  
292 haplotypes in hybrids across the fitness landscape supported this interpretation; one of the most

*Hybridization alters the fitness landscape*

293 common haplotypes was most frequent in hybrids resembling generalists near the peak of high  
294 fitness and rare in hybrids resembling either trophic specialist (Figure 2—figure supplement 8).  
295 Regardless, this two-dimensional phenotypic fitness landscape did not reveal fitness ridges  
296 connecting generalists to specialists, further emphasizing the need to investigate the genotypic  
297 fitness landscape.

298

299 *Trophic novelty is associated with isolation on the genotypic fitness network*

300 The adaptive radiation of pupfishes on San Salvador island originated within the last 10,000  
301 years through a combination of selection on standing genetic variation, adaptive introgression,  
302 and *de novo* mutations (55). However, it is unclear how each source of genetic variation aided in  
303 the traversal of fitness paths or contributed to the colonization of novel fitness peaks. To address  
304 this knowledge gap, we first sought to visualize genotypic fitness networks and gain insight into  
305 how isolated the three species are in genotypic space. Understanding the relative isolation of  
306 each specialist from the generalist can reveal the relative accessibility of their respective adaptive  
307 walks on the genotypic fitness landscape.

308 To accomplish this, we reconstructed genotypic fitness networks from 1,498 candidate  
309 adaptive alleles previously identified in this system (e.g. Figure 3a (55)). These regions displayed  
310 significant evidence of a hard selective sweep using both site frequency spectrum and LD-based  
311 methods, SweeD (99) and OmegaPlus (100), and contained fixed or nearly fixed SNPs ( $F_{ST} >$   
312 0.95) differentiating trophic specialists across lakes (55). Adaptive alleles were classified as  
313 standing variation, introgressed, or *de novo* mutations based on extensive sampling of focal and  
314 related *Cyprinodon* pupfish species across San Salvador Island and neighboring Caribbean  
315 islands, as well as North and South American outgroups (55). We note, however, that adaptive

*Hybridization alters the fitness landscape*

316 alleles designated as *de novo* on San Salvador Island may be segregating at low frequencies in  
317 other sampled populations or present in unsampled populations.

318         These fitness networks depict both hybrids and parental species in genotypic space, with  
319 nodes representing SNP haplotypes and edges connecting mutational neighbors (Figure 3b).  
320 Genotypic space is immense; using SNPs coded as homozygous reference, heterozygote, or  
321 homozygous alternate, the number of potential haplotypes is equal to  $3^{\# \text{ SNPs in network}}$ . For  
322 instance, to construct a reduced network of 100 SNPs, there are a total of  $3^{100} = 5.17 \times 10^{57}$   
323 possible nodes. Thus, unlike experimental studies of individual proteins in haploid *E. coli* (31,  
324 45) or yeast (22), it is not possible for us to investigate the full breadth of genotypic space.

325         Instead, to understand the distribution of parental species and their hybrids in genotypic  
326 space, we began by using a random sample of ten SNPs drawn from our set of candidate adaptive  
327 alleles in this system. Here, we plotted edges between nodes up to five mutational steps away  
328 (e.g. Figure 3b) and found that generalists and molluscivores are closer on the genotypic fitness  
329 network than either is to scale-eaters (Figure 3c), as expected based on their genetic distance.  
330 Most scale-eaters appear quite isolated in genotypic space, separated from the generalist cluster  
331 of nodes by  $12.6 \pm 0.091$  (mean  $\pm$  SE:  $P < 0.001$ ) mutational steps and from molluscivores by  
332  $16.3 \pm 0.060$  steps ( $P < 0.001$ ). In contrast, molluscivores were separated from generalists by  
333  $5.37 \pm 0.103$  steps ( $P < 0.001$ ). Generalists show the greatest intrapopulation distances, separated  
334 from each other by  $6.08 \pm 0.088$  steps ( $P < 0.001$ ). In contrast, molluscivores exhibited the  
335 smallest intrapopulation distances, separated by  $1.75 \pm 0.021$  steps ( $P < 0.001$ ). Scale-eater  
336 intrapopulation distances were intermediate ( $4.71 \pm 0.088$  steps:  $P < 0.001$ ).



Hybridization alters the fitness landscape

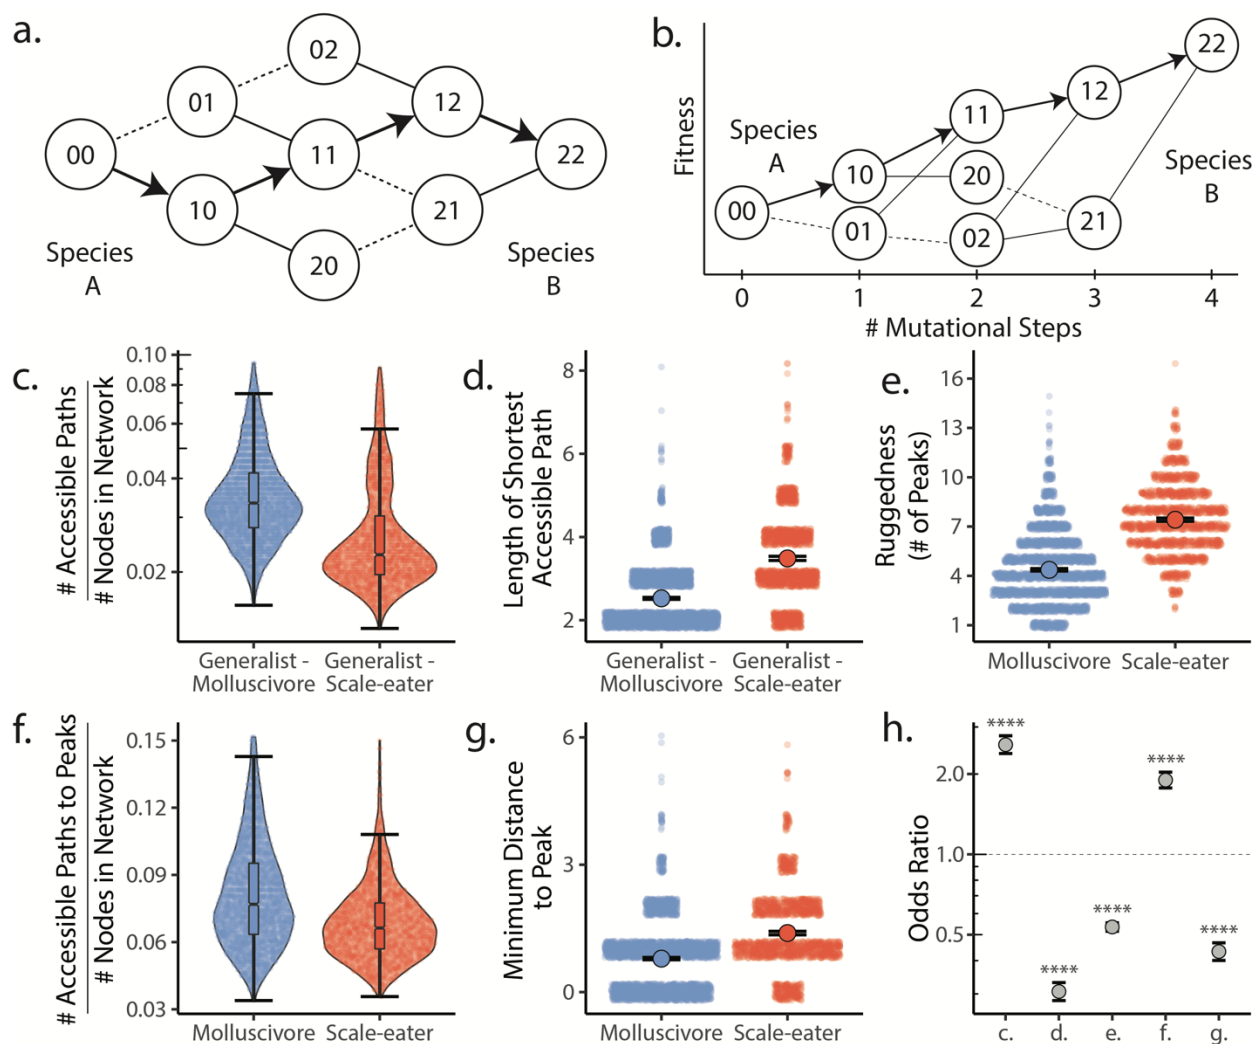

337  
 338 **Figure 4. Molluscivore genotypes were more accessible to generalists on the genotypic fitness**  
 339 **landscape than scale-eater genotypes.** **a.** Diagram illustrating genotypic fitness networks and adaptive  
 340 walks between species for a hypothetical two-SNP genotypic fitness landscape. Species A & B are  
 341 separated by four mutational steps. Dashed lines indicate inaccessible paths that decrease in fitness  
 342 leaving a single possible accessible evolutionary trajectory between species A and B (indicated by bold  
 343 arrows). Each node in our study is associated with an empirical measure of hybrid fitness from field  
 344 experiments (17, 18). Edges are always drawn as directed from low to high fitness. **b.** The same network  
 345 as in (a.), with fitness plotted on the Y-axis and number of mutational steps from species A to B on the X-  
 346 axis. The only accessible path between species A and B is indicated by solid arrows. **c.** Number of  
 347 accessible paths between generalists and either specialist, scaled by network size. **d.** Length (# of nodes)  
 348 of the shortest accessible paths. Means (large points)  $\pm$  2 standard errors are plotted. **e.** Ruggedness, as  
 349 measured by the number of peaks (genotypes with no fitter neighbors within a single mutational step  
 350 (32)). **f.** Number of accessible paths to peaks, scaled by network size. **g.** Length of the shortest accessible  
 351 path to the nearest peak. **h.** Odds ratios (OR: ML estimate and 95% CI) for each measure of accessibility  
 352 (x-axis corresponds to panel letters); molluscivore networks have significantly greater summary statistics  
 353 when OR > 1. Molluscivore genotypes are more accessible to generalists than scale-eater genotypes due  
 354 to a significantly greater number of accessible paths separating them (c.) that are significantly shorter (d.).  
 355 Molluscivore genotypic networks were also less rugged, i.e. they contained significantly fewer peaks (e.),  
 356 each of which were in turn more accessible from the generalist genotypes (f., g.).

*Hybridization alters the fitness landscape*

357 *Molluscivore genotypes are more accessible to generalists than scale-eater genotypes on the*  
358 *genotypic fitness landscape*

359 The most accessible paths through genotypic fitness networks are characterized by  
360 monotonically increasing fitness at each mutational step and the smallest possible number of  
361 steps between two states (5, 31, 33) (Figure 4a-b). Furthermore, as described earlier, the  
362 accessibility of individual fitness peaks is predicted to be reduced on increasingly rugged fitness  
363 landscapes that are characterized by a greater number of fitness peaks (8, 30, 33, 101). This  
364 provides three useful metrics of evolutionary accessibility for genotypic trajectories: 1) the total  
365 number of accessible paths relative to network size (Figure 4—figure supplement 1; Appendix  
366 1—table 16), 2) the length of the shortest accessible paths, and 3) the number of fitness peaks  
367 (ruggedness). Here, we define peaks as genotypes with no fitter neighbors and within a single  
368 mutational step (32). With these three metrics, we can quantify the accessibility of interspecific  
369 genotypic pathways.

370 We used these measures of accessibility to ask: 1) whether molluscivore or scale-eater  
371 genotypes were more accessible to generalists on the fitness landscape (Figure 4c-d), and 2)  
372 whether molluscivore and scale-eater genotypic fitness networks differed in their ruggedness,  
373 characterized by peak number (Figure 4e-g). These measures provide insight into the  
374 predictability of evolution and the role that epistasis plays in their evolution (8, 23, 29, 102).

375 We constructed 5,000 genotypic fitness networks from a random sample of five species-  
376 specific candidate adaptive SNPs (Figure 3a) for either molluscivores or scale-eaters, requiring  
377 that at least one SNP of each source of genetic variation be present in the sample. We used odds  
378 ratios to compare the relative accessibility and ruggedness of molluscivore fitness networks

*Hybridization alters the fitness landscape*

379 compared to scale-eater networks (Figure 4h). Thus, odds ratios (OR) greater than 1 imply  
380 summary statistics are greater for molluscivores than for scale-eaters.

381 We found that molluscivore genotypes were significantly more accessible to generalists  
382 on the fitness landscape than scale-eaters (Appendix 1—table 17); molluscivore networks had  
383 significantly more accessible paths [OR: (95% CI)= 2.095: (1.934, 2.274)] that were  
384 significantly shorter [OR and 95% CI = 0.253: (0.231, 0.277)]. Not only were molluscivore  
385 genotypes more accessible to generalists, but molluscivore fitness networks were significantly  
386 less rugged than scale-eater networks, comprised of fewer peaks [OR and 95% CI = 0.604:  
387 (0.575, 0.634)], and connected by significantly more accessible paths [OR and 95% CI = 1.514:  
388 (1.404, 1.635)], that contained fewer mutational steps [OR and 95% CI = 0.539: (0.500, 0.579)].

389

390 *Adaptive introgression and de novo mutations increase accessibility of novel fitness peaks*

391 We further used our two metrics of accessibility and landscape ruggedness to ask how different  
392 sources of adaptive genetic variation may influence the topography of the fitness landscape, the  
393 traversal of fitness paths separating generalists from specialists, and ultimately colonization of  
394 novel fitness peaks. We constructed genotypic fitness networks limited to only one of the three  
395 main sources of adaptive genetic variation: standing genetic variation, introgression from one of  
396 four focal Caribbean generalist populations, or *de novo* mutations unique to San Salvador Island.  
397 We also examined all combinations of these three sources to better reflect the actual process of  
398 adaptive divergence originating from only standing genetic variation, then adaptive introgression  
399 plus standing genetic variation, and finally the refinement stage of *de novo* mutations (55).

Hybridization alters the fitness landscape

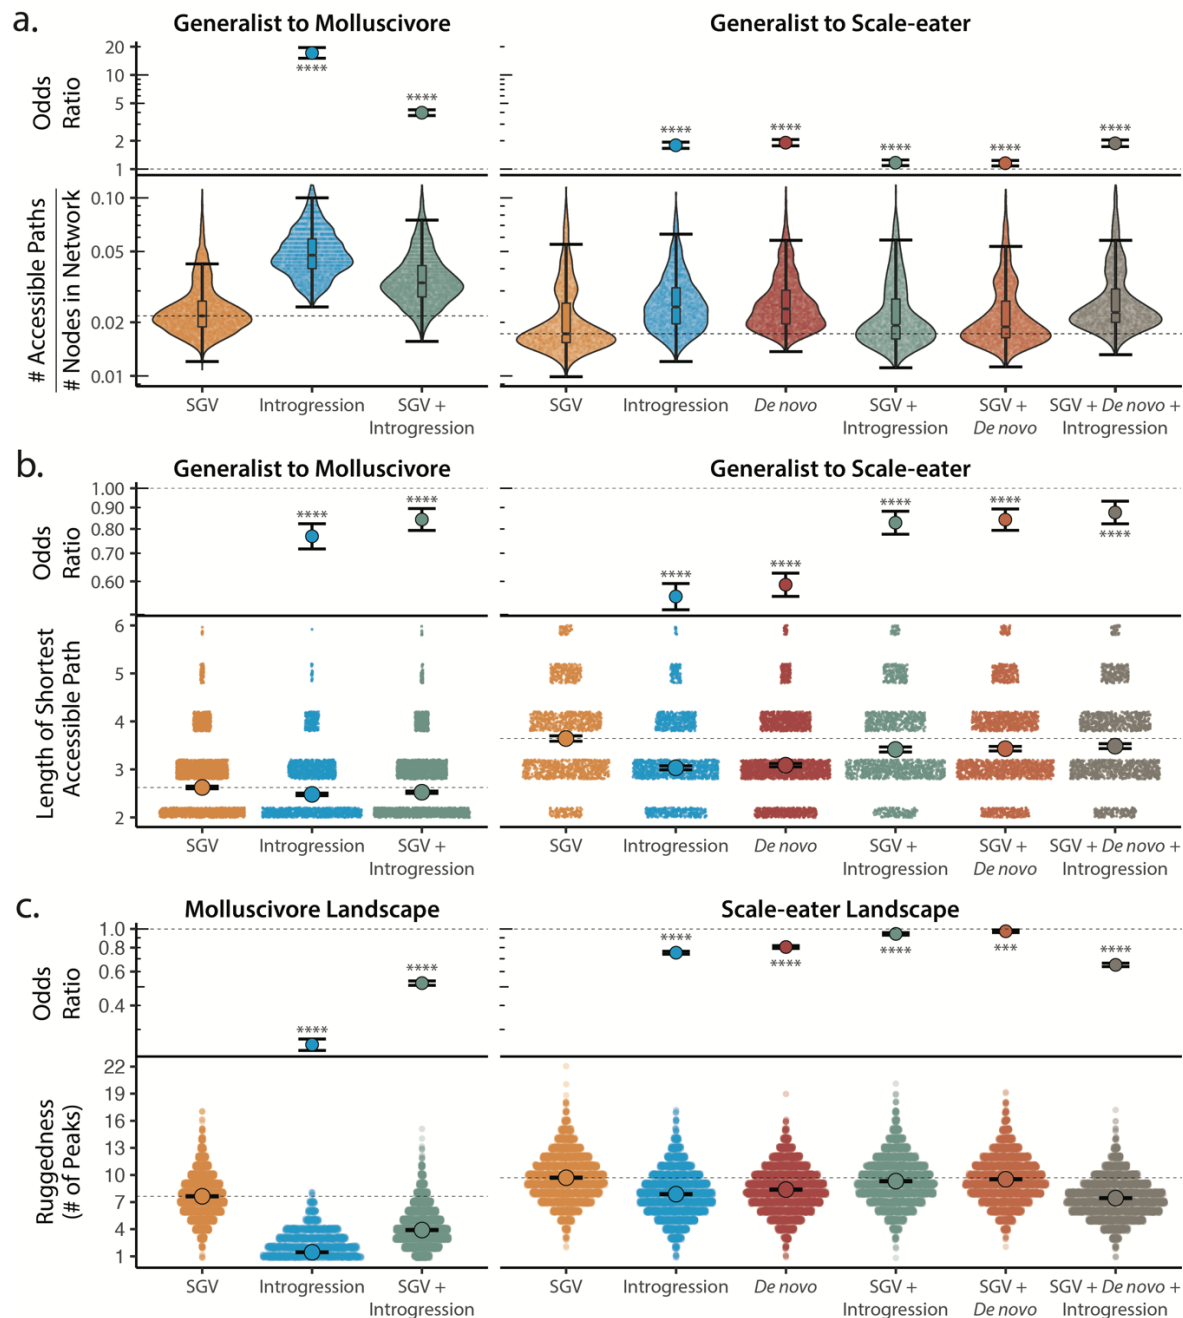

400  
 401 **Figure 5. Adaptive introgression and *de novo* mutations increase access to specialist fitness peaks.**  
 402 Odds ratios (maximum likelihood estimate and 95% CI) indicate the effect of each source of variation on  
 403 accessibility compared to networks estimated from standing variation alone. Asterisks denote significance  
 404 ( $p < 0.0001 = ****$ ,  $< 0.001 = ***$ ). **a.** The number of accessible (i.e. monotonically increasing in fitness)  
 405 paths per network, scaled by the size of the network (# of nodes in network). Significance was assessed  
 406 using a likelihood ratio test, corrected for the false discovery rate (reported in Appendix 1—table 18).  
 407 Dashed lines correspond to the median estimate for standing genetic variation to aid comparison to other  
 408 sources of adaptive variation. **b.** Number of mutational steps in the shortest accessible path. Means are  
 409 plotted as large circles, with two standard errors shown; dashed horizontal lines correspond to the mean  
 410 for standing genetic variation. **c.** Ruggedness of molluscivore and scale-eater genotypic fitness networks  
 411 constructed from each source of genetic variation measured by the number of peaks (genotypes with no  
 412 fitter neighbors).

*Hybridization alters the fitness landscape*

413 We compared sets of 5,000 random 5-SNP genotypic networks drawn from different  
414 sources of adaptive variation (Figure 4a) and compared the effect of each source of variation on  
415 measures of accessibility and landscape ruggedness relative to standing genetic variation. We  
416 treated standing variation as our basis for comparison because this is the source of genetic  
417 variation first available to natural selection (103).

418 We discovered that genotypic trajectories between generalists and either trophic specialist  
419 in genotypic fitness networks constructed from introgressed or *de novo* adaptive mutations were  
420 significantly more accessible than networks constructed from standing genetic variation (Figure  
421 5). Specifically, random networks that included alternate sources of adaptive variation contained  
422 significantly more accessible fitness paths from generalist to specialists than networks  
423 constructed from standing genetic variation alone, while controlling for differences in overall  
424 network size (Figure 5a; Appendix 1—table 18). Furthermore, accessible paths between  
425 generalists and specialists in networks constructed from introgressed or *de novo* adaptive loci  
426 were significantly shorter in length (Figure 5b). We recovered the same pattern whether  
427 constructing fitness networks from these sources of variation alone or in combination. These  
428 results held across all measures of fitness and for analyses repeated using only hybrids sampled  
429 from the second field experiment (Figure 5—figure supplement 1-2, Appendix 1—table 18-19).

430 Our finding of increased accessibility of interspecific genotypic trajectories suggests that  
431 fitness landscapes constructed from adaptive standing genetic variation alone are more rugged  
432 than networks including adaptive loci originating from either introgression or *de novo* mutation.  
433 Quantification of landscape ruggedness supported this hypothesis in all cases (Figure 5c;  
434 Appendix 1—table 18-19). Additionally, increasing landscape ruggedness significantly

*Hybridization alters the fitness landscape*

435 decreased the length of accessible paths to the nearest local peak [glm(Min. Path Length ~ # of  
436 Peaks, family = “poisson”):  $P < 0.0001$ ,  $\beta = -0.088$ , 95% CI = -0.095 – 0.081].  
437         Scale-eater fitness genotypic fitness landscapes constructed from a combination of  
438 adaptive loci sourced from standing variation, introgression, and *de novo* mutations had  
439 significantly more accessible paths (scaled by network size) separating generalists from scale-  
440 eaters [OR and 95% CI = 1.879: (1.743, 2.041); LRT  $P < 0.0001$ ; Figure 5a] and these paths  
441 were significantly shorter in length compared to networks constructed from standing variation  
442 alone [OR and 95% CI = 0.876: (0.823, 0.932); LRT  $P < 0.0001$ ; Figure 5b]. The only exception  
443 to this pattern across all three fitness measures was for growth rate in genotypic fitness networks  
444 constructed for molluscivore adaptive loci; no significant difference was observed in the length  
445 of the shortest accessible path between networks constructed using standing variation alone or  
446 those constructed using introgressed alleles [OR and 95% CI = 0.994: (0.915, 1.079); LRT  $P =$   
447 0.8826; Appendix 1—table 18]. Interestingly, however, for networks constructed from standing  
448 variation and introgressed alleles, we again observed a significant reduction in length of the  
449 shortest accessible paths [OR and 95% CI = 0.897: (0.835, 0.962); LRT  $P = 0.0050$ ; Appendix  
450 1—table 18].

451

452 **Discussion**

453 We developed a new approach for estimating genotypic fitness landscapes for diploid organisms  
454 and applied it to a system in which phenotypic fitness landscapes have been extensively  
455 investigated. We were able to address long-standing questions posed by fitness landscape theory  
456 in an empirical system and assess the extent to which the shape of the fitness landscape and  
457 accessibility of adaptive walks are contingent upon the source of adaptive genetic variation. We

*Hybridization alters the fitness landscape*

458 show that not only are scale-eaters more isolated than molluscivores from generalists on the  
459 fitness landscape, but that the scale-eater fitness landscape is more rugged than molluscivores.  
460 This indicates that epistasis is more pervasive on the scale-eater fitness landscape, leading to less  
461 predictable evolutionary outcomes and fewer accessible trajectories from generalist to scale-eater  
462 genotypes. Overall, we found that most genotypic trajectories were inaccessible and included one  
463 or more mutational steps that decreased in fitness from generalist to specialist. This finding is  
464 consistent with the patterns observed by Weinreich et al. (31), who constructed combinatorially  
465 complete fitness networks for five mutations contributing to antibiotic resistance in *E. coli* and  
466 found that only 18 of 120 possible genotypic trajectories were evolutionarily accessible. In  
467 contrast, Khan et al. (45) estimated that over half of all trajectories were accessible on a complete  
468 fitness landscape constructed using the first five adaptive mutations to fix in an experimental  
469 population of *E. coli*.

470 We also show that fitness landscapes are most rugged, and therefore epistasis is most  
471 pervasive, when constructed from standing genetic variation alone, ultimately leading to a  
472 reduction in the accessibility of fitness peaks on these landscapes (Figure 5). This finding has  
473 significant implications for the predictability of evolution in the earliest stages of the speciation  
474 process. Adaptation from standing genetic variation is thought to initially be more rapid due to  
475 its initial availability and potentially reduced genetic load within a population (103–105). In  
476 contrast, we consistently found that networks constructed from a combination of adaptive  
477 standing variation, introgression, and *de novo* mutations reduced the ruggedness of fitness  
478 landscapes and thus increased accessibility of interspecific evolutionary trajectories (Figure 5).  
479 This would suggest that adaptive introgression or *de novo* mutations reduce the impacts of  
480 epistasis, resulting in a smoother fitness landscape with a greater number of accessible adaptive

*Hybridization alters the fitness landscape*

481 walks, facilitating the colonization of new adaptive zones. Future studies testing the generality of  
482 these findings will be invaluable for our understanding of the speciation process.

483 Furthermore, our results shed light on the classic problem of crossing fitness valleys on  
484 three-dimensional phenotypic fitness landscapes. We show that phenotypic fitness valleys may  
485 be circumvented by rare accessible paths on the genotypic fitness landscape. These results are  
486 consistent with increasing recognition that three-dimensional depictions of the fitness landscape  
487 may lead to incorrect intuitions about how populations evolve (3, 5, 106).

488 Our study represents a significant contribution to the growing body of work applying  
489 fitness landscape theory to empirical systems (39, 46, 107–109). Unlike previous studies that  
490 experimentally generated combinatorically complete fitness landscapes (22, 31, 45), we  
491 subsampled loci across the genome, enabling us to quantify aspects of the genotypic fitness  
492 landscape, despite the limitations imposed by large genome sizes and non-model vertebrates.  
493 One limitation of this approach is that subsampled fitness networks may not directly correspond  
494 to the full landscape (5, 110). For instance, a given subsampled fitness landscape may be present  
495 on multiple global, fully sampled fitness landscapes (110). Secondly, nodes (here, SNP  
496 haplotypes) can appear disconnected in a subsampled fitness landscape, but may be connected in  
497 the full fitness landscape (5). Nevertheless, given that there are more possible genotypes for a  
498 gene of 1,000 base-pairs than particles in the known universe (1, 111), nearly all empirical  
499 fitness landscapes must necessarily be subsampled at some scale.

500 Although inferences from subsampled fitness networks have their limitations, so too do  
501 those obtained from combinatorically complete fitness landscapes, which may themselves be  
502 misleading (102). By including mutations that are not segregating in natural populations, the  
503 shape of the “complete” fitness landscape and thus accessibility of fitness peaks may be quite



*Hybridization alters the fitness landscape*

504 different from what occurs in nature. The shape of fitness landscapes in nature is dictated by the  
505 “realized” epistasis that occurs among naturally segregating loci (102). Changes to “realized”  
506 epistasis induced by introgression or *de novo* mutations appears to be the mechanism altering the  
507 shape of the fitness landscape and thus accessibility of fitness peaks. Our findings that adaptive  
508 introgression and *de novo* mutations make fitness peaks more accessible points towards a  
509 pervasive role of epistasis in determining the predictability of evolution and the speciation  
510 process (5, 8, 22–24, 30).

511 In the present study we have taken snapshots of the fitness landscape from loci that have  
512 already undergone hard selective sweeps. Consequently, we cannot directly assess the influence  
513 of each adaptive allele on the fitness landscape through time as it increases in frequency.  
514 However, so far we have failed to detect evidence of frequency-dependent selection in this  
515 system after experimental manipulations, at least for morphological traits (18). Future  
516 experimental or simulation studies may track how novel adaptive alleles affect fitness landscape  
517 topography as they increase in frequency.

518

519 **Conclusion**

520 Our findings are consistent with a growing body of evidence that *de novo* and introgressed  
521 adaptive variation may contribute to rapid speciation and evolution towards novel fitness peaks  
522 (44, 70, 78, 112–116). We demonstrate that adaptive introgression smooths the fitness landscape  
523 and increases the accessibility of fitness peaks. This provides an alternative mechanism to  
524 explain why hybridization appears to play such a pervasive role in adaptive radiation and  
525 speciation. There are many examples of hybridization promoting or inducing rapid speciation  
526 and adaptive radiation. Whether in Galapagos finches (117), African cichlids (77, 78, 113, 118,

*Hybridization alters the fitness landscape*

527 119), or *Heliconius* butterflies (75, 120), hybridization has been shown to play a generative role  
528 in adaptive radiation and the evolution of novelty. One mechanism is the increased genotypic,  
529 phenotypic, and ecological diversity generated by hybridization in the form of transgressive  
530 phenotypes (74, 121–124). This diversity in turn facilitates the colonization of novel fitness  
531 peaks and ecological niches, particularly after colonization of a new environment rich in  
532 ecological opportunity (73, 74, 125). However, this model often assumes that the fitness  
533 landscape remains static after adaptive introgression. Here we show that adaptive introgression  
534 directly alters the shape of the fitness landscape, making novel fitness peaks more accessible to  
535 natural selection. Thus, hybridization not only generates genetic diversity, but this diversity can  
536 alter the shape of the fitness landscape, changing which genotypic combinations are favored by  
537 natural selection along with the adaptive walks that lead to them.

538

539 **Acknowledgements:**

540 We thank Michelle St. John, David Tian, Jacqueline Galvez, and Maria Fernanda Palominos for  
541 insightful discussion of the results; the Gerace Research Centre and Troy Day for logistical  
542 support; the BEST Commission and the government of the Bahamas for permission to collect,  
543 import, and export samples; the Vincent J. Coates Genomics Sequencing Center and Functional  
544 Genomics Laboratory at UC Berkeley for performing whole genome library preparation and  
545 sequencing (supported by NIH S10 OD018174 Instrumentation Grant), and the University of  
546 California, Berkeley and University of North Carolina at Chapel Hill for computational  
547 resources. This work was funded by the National Science Foundation DEB CAREER grant  
548 #1749764, National Institutes of Health grant 5R01DE027052-02, the University of North  
549 Carolina at Chapel Hill, and the University of California, Berkeley to CHM, graduate research

550 funding from the Museum of Vertebrate Zoology to EJR, and an NSF Postdoctoral Research  
551 Fellowship in Biology under Grant No. 2109838 to AHP.

552

553 **Data availability:**

554 Genomic data are archived at the National Center for Biotechnology Information BioProject  
555 Database (Accessions: PRJNA690558; PRJNA394148, PRJNA391309). Sample metadata  
556 including morphological measurements and admixture proportions have been uploaded to Dryad:  
557 <https://doi.org/10.5061/dryad.0vt4b8h0m>.

558

559 **Methods:**

560 ***Sampling***

561 Our final genomic dataset was comprised of 139 hybrid samples used in two separate field  
562 experiments (17, 18) on San Salvador Island. Experiments were conducted in two lakes: Little  
563 Lake (N = 71) and Crescent Pond (N = 68). Hybrids used in the first field experiment (17) were  
564 comprised of F2 and backcrossed outbred juveniles resulting from crosses between all three  
565 species. Juveniles were raised for 2 months in the lab, individually tagged by injecting a stainless  
566 steel sequential coded wire tag (Northwest Marine Technologies, Inc.) into their left dorsal  
567 musculature, and photographed pre-release for morphometric analyses. Experimental field  
568 enclosures consisted of high- and low-density treatments; density was varied by the number of  
569 tagged juveniles released into each enclosure. Hybrids in the second field experiment (18) were  
570 comprised of F4-F5 outbred juveniles resulting from crosses between all three species.  
571 Individuals were spawned, raised, tagged, and photographed in the same way prior to release.  
572 The second field experiment consisted of high- and low-frequency treatments of approximately

*Hybridization alters the fitness landscape*

573 equal densities. The frequency of rare transgressive hybrid phenotypes was manipulated between  
574 treatments in each lake, such that the high- and low-frequency treatments harbored an artificially  
575 increased and decreased frequency of transgressive phenotypes, respectively (18).

576 All hybrids were measured for 32 external morphological traits (see below). Additionally,  
577 we sequenced parental species of the generalist (N = 17), molluscivores (N = 27), and scale-  
578 eaters (N = 25) sampled from these two lakes and previously included in Richards et al. (55).  
579 Note that we treated samples from Little Lake and Osprey Lake as the same population because  
580 these two lakes are connected through a sand bar and fish from these populations are genetically  
581 undifferentiated (54, 55). For morphological analyses, we additionally measured samples of 60  
582 generalists, 38 molluscivores, and 60 scale-eaters raised in the same laboratory common garden  
583 environment as the hybrids used in field experiments. A full list of samples is included in the  
584 supplement (Appendix 1—table 1).

585

586 ***Sequencing, genotyping, and filtering***

587 Raw reads from a combined set of 396 samples (see supplement) were first mapped to the *C.*  
588 *brontotheroides* reference genome (genome size = 1.16 Gb; scaffold N50 = 32 Mb) (55) using  
589 bwa-mem (v. 0.7.2). Duplicate reads were identified using MarkDuplicates and BAM indices  
590 were subsequently generated using the Picard software package (126). Samples were genotyped  
591 following Richards et al. (55) according to GATK best practices (127). Specifically, Single  
592 Nucleotide Polymorphisms (SNPs) were called and filtered using hard-filtering criteria in  
593 HaplotypeCaller. We used the following criteria in our filtering approach: QD < 2.0; QUAL <  
594 20; FS < 60; MQRankSum < -12.5; ReadPosRankSum < -8 (127–129).

*Hybridization alters the fitness landscape*

595           Following initial genotyping with GATK, we subsequently filtered our data further using  
596 VCFtools (130). Specifically, we filtered using the following flags: --maf 0.05; --min-alleles 2; --  
597 max-alleles 2; --min-meanDP 7; --max-meanDP 100; --max-missing 0.85. Indels were removed.  
598 To reduce non-independence among sites in our final dataset, we conservatively removed sites in  
599 strong linkage disequilibrium using plink v1.9 (--indep-pairwise 10['kb'] 50 0.5: (131)). This  
600 resulted in the retention of 1,129,771 SNPs across 139 hybrid samples and the 69 wild-caught  
601 samples from Richards et al (55). Unless otherwise specified, these SNPs were used for all  
602 downstream analyses.

603

604 ***Hybrid fitness measures***

605 We used three proxies for fitness: survival, growth, or a composite measure of the two. Survival  
606 was a binary trait indicating whether a fish survived (i.e. a tagged fish was recovered) or not  
607 during its exposure period in field enclosures. Growth was a continuous measure, defined as the  
608 proportional increase in Standard Length ( $\frac{Final\ SL - Starting\ SL}{Starting\ SL}$ ). Lastly, we defined composite  
609 fitness as survival \* growth, similar to the metric used in (132), and analogous to composite  
610 fitness in Hereford (133) who used fecundity as their second fitness measure, rather than growth.  
611 Composite fitness is equal to growth for survivors and equals zero for non-survivors because  
612 growth could not be assessed for non-surviving individuals. Because composite fitness represents  
613 the most information-rich metric of fitness, we report composite fitness results in the main text;  
614 results for growth and survival are included in the supplement.

615 ***Population genetic variation***

616 To visualize genetic variation present in hybrids and across lakes (Crescent Pond and Little  
617 Lake), we first used a Principal Components Analysis (PCA) of genetic variation using plink  
618 v1.90 ((131), Figure 1), plotting the first two principal component axes using R (version 3.6.3 (R  
619 Core team 2020)). We then estimated admixture proportions in hybrids using ADMIXTURE  
620 v1.3.0 (82). Populations of each species were substantially differentiated between Crescent Pond  
621 and Little Lake (54, 55); thus, independent ADMIXTURE analyses were conducted for each  
622 lake. Because we were primarily interested in admixture proportions of hybrids, we set  $K = 3$  in  
623 these analyses, corresponding to the three parental species used in hybrid crosses. Using  
624 admixture proportions of hybrid individuals, we tested the hypothesis that ancestry predicts  
625 hybrid composite fitness in experimental field enclosures by fitting a generalized additive model  
626 including either 1) scale-eater ancestry or 2) molluscivore ancestry with fixed effects for  
627 experiment and lake. This was repeated for survival and growth separately. Composite fitness  
628 was analyzed using a tobit (zero-censored) model to account for zero-inflation using the censReg  
629 R package (134), survival was analyzed using a binomial model, and growth was analyzed using  
630 a gaussian model. We conducted additional ADMIXTURE analyses that either 1) were  
631 supervised, with generalist, molluscivore, and scale-eater parentals *a priori* assigned to one of  
632 three populations, with only hybrid ancestry proportions being estimated by admixture, or 2)  
633 using only samples from the second field experiment. The same linear models described above  
634 were subsequently repeated using these alternative admixture proportions.

635 ***Genome-wide association tests***

636 To identify SNPs that were most strongly associated with fitness (survival, growth, or  
637 composite), we implemented the linear mixed model (LMM) approach in GEMMA (v. 0.98.1:  
638 (135)). This analysis was repeated using each fitness measure as the response variable. To  
639 account for relatedness among samples we estimated the kinship matrix among all 139 hybrid  
640 samples, which in turn were used in downstream LMMs. To account for the potentially  
641 confounding effect of year/experiment and lake on estimated fitness measures, we included each  
642 as covariates in the LMMs. To ensure rare variants were not included in these analyses, we only  
643 included sites that had a minor allele frequency greater than 5% across all hybrids. A total of  
644 933,520 SNPs were analyzed; 196,251 SNPs were excluded due to allele frequency change  
645 following removal of parental species. SNPs strongly associated with fitness were identified with  
646 1) a False Discovery Rate (FDR: Benjamini and Hochberg 1995) less than 0.05, or a 2) *P*-value  
647 < 0.05 following Bonferroni correction. We focused primarily on the sites identified by the  
648 conservative Bonferroni correction, however.

649

650 ***Gene ontology enrichment***

651 We annotated sites that were significantly associated with fitness using snpEff (136) and the  
652 annotated *C. brontotheroides* reference genome (55). We constructed a custom database within  
653 snpEff using the functional annotations originally produced by Richards et al. (55), and  
654 subsequently extracted information on the annotations and putative functional consequences of  
655 each variant.

656 Using genes identified for each SNP that was significantly associated with one of the  
657 fitness measures, we performed Gene Ontology (GO) enrichment analyses using ShinyGO v0.61

*Hybridization alters the fitness landscape*

658 (137). For genes identified as being intergenic, we included both flanking genes. As in Richards  
659 et al. (2021), the gene symbol (abbreviation) database that had the greatest overlap with ours was  
660 that of the human database; thus, we tested for enrichment of biological process ontologies  
661 curated for human gene functions, based on annotations from Ensembl. Results are reported for  
662 biological processes that were significantly enriched with  $FDR < 0.05$ . We then compared this  
663 list of candidate loci to those identified in past studies of San Salvador Island pupfishes (55, 88,  
664 138).

665

666 ***Morphometrics***

667 We measured 31 external morphological traits for all 139 hybrids and 69 parental individuals  
668 from Crescent Pond (30 generalists, 19 molluscivores, and 30 scale-eaters) and 85 from Little  
669 Lake (30 generalists, 25 molluscivores, and 30 scale-eaters). We digitally landmarked dorsal and  
670 lateral photographs (both sides) of each lab-reared hybrid (pre-release) or parent using DLTdv8  
671 (139). Measurements included 27 linear distances and three angles. For nearly all individuals,  
672 lateral measurements were collected from both lateral photographs and averaged. Morphological  
673 variables were size-corrected using the residuals of a  $\log_{10}(\text{trait}) \sim \log_{10}(\text{standard length})$   
674 regression standardized for selection analyses as outlined in the supplement. We used these 31  
675 morphological traits to estimate two linear discriminant (LD) axes that best distinguished the  
676 generalist, molluscivore, and scale-eater using the LDA function in the mass package in R. We  
677 then used the resultant LD model to predict LD-scores for the 139 sequenced hybrids for later  
678 use in generalized additive models.

679



680 ***Estimation of adaptive landscapes***

681 We fit generalized additive models (GAMs) using the mgcv package v. 1.8.28 (140) in R to  
682 estimate fitness landscapes for the two discriminant axes (LD1-2) and fitness. All models  
683 included a thin-plate spline fit to the two linear discriminant axes and we included both lake and  
684 experiment in all models as fixed effects. Lake by experiment interaction terms were also  
685 included in some models. Models were ranked using the corrected Akaike Information Criterion  
686 for small sample sizes (AICc) and were considered to be a substantially worse fit to the data if  
687  $\Delta\text{AICc} > 4$  from the best-fit model (141). The best-fit model from the above approach was in  
688 turn used to visualize fitness landscapes, plotting predicted values of fitness measures on the two  
689 discriminant axes in R (Figure 2).

690 Using these results, we tested whether inclusion of SNPs that were strongly associated  
691 with fitness (i.e., those that surpassed the 0.05 Bonferroni threshold) improved estimation of  
692 fitness landscapes. We first extracted genotypes for the highly significant SNPs identified by  
693 GEMMA (13 for composite fitness, four for only growth: see section *Fitness-genotype*  
694 *association test*), and coded these as either reference, single, or double mutants using VCFtools  
695 (130). We then used the best-fit models identified above and fit a range of models that included  
696 one or all SNPs. Individual fitness-associated SNPs were treated as ordered factors (i.e. transition  
697 from homozygous reference to heterozygote to homozygous alternate) and modeled using a  
698 factor-smooth in the generalized additive models. Note that factor “smooths” are effectively  
699 modeled as step-functions.

700 To quantify whether the local features of the complete fitness landscape constructed  
701 using all morphological variables and the most strongly fitness-associated SNPs were robust to  
702 sampling uncertainty, we conducted a bootstrapping procedure for this model. Specifically, we

*Hybridization alters the fitness landscape*

703 resampled hybrids with replacement 10,000 times and refit the full model. We then calculated  
704 the mean predicted composite fitness for each linear discriminant (LD) axis in slices across the  
705 fitness landscape, both for our observed dataset, and for each bootstrap replicate. Slices divided  
706 the fitness landscape into thirds for each LD axis. We then quantified the mean and standard  
707 deviation of the predicted composite fitness for each position along the other LD axis.

708 We quantified uncertainty (mean  $\pm$  SD) around local features of the bootstrapped fitness  
709 landscapes as compared to the observed values of predicted fitness for the same ‘slice’ of the  
710 fitness landscape. We predicted values at the same 30 points along each LD axis. We then  
711 plotted the locations of parents along the x-axis (LD1 or LD2) to enable relation of features on  
712 the fitness landscape to parental phenotypic distributions.

713

714 ***Estimation of genotypic fitness networks***

715 We first estimated genotypic networks using sites previously shown to be highly divergent ( $F_{ST}$   
716  $> 0.95$ ) and showing significant evidence of a hard selective sweep in one of the trophic  
717 specialists (based on evidence from both SweeD and OmegaPlus: (55, 99, 100)). We identified  
718 the SNPs in our unpruned full dataset overlapping with sites inferred to have undergone selective  
719 sweeps (55), resulting in 380 SNPs for molluscivores and 1,118 SNPs for scale-eaters. We  
720 subsequently constructed genotypic fitness networks in igraph v. 1.2.4.1 (142) following the  
721 procedure outlined in the supplement.

722 To visualize the high-dimensional genotypic fitness network, we randomly sampled ten  
723 adaptive loci 100 times and plotted haplotypes connected by edges if they were within five  
724 mutational steps of one another (Figure 3C). Then we calculated the mean distance between all

725 species pairs (in number of mutational steps). We used pairwise Tukey's HSD tests to test whether  
726 inter-species distances differed.

727

### 728 ***Estimation of evolutionary accessibility***

729 We tested whether the evolutionary accessibility of genotypic fitness trajectories through  
730 observed hybrid genotypes from generalist to each specialist species differed based on the source  
731 of genetic variation. We restricted our investigation to networks composed of adaptive loci as  
732 previously described (Figure 3A: Richards et al. 2021). This included a total of 380 SNPs in the  
733 molluscivores, and 1,118 in the scale-eaters. The reduced number of adaptive SNPs sites in our  
734 dataset as compared to that of (55) is due primarily to the increased stringency of our filtering.  
735 We further partitioned these SNPs by their respective sources: standing genetic variation  
736 (molluscivore N = 364; scale-eater N = 1,029), *de novo* mutation (scale-eater N = 24), or  
737 introgression (molluscivore N = 16; scale-eater N = 65), again using the assignments from  
738 Richards et al. (55). For analyses of trajectories between generalists and molluscivores, we  
739 included only SNPs found to be sweeping in molluscivores; likewise, we included only SNPs  
740 sweeping in scale-eaters for analysis of trajectories between generalists and scale-eaters.

741 The full procedure for constructing genotypic fitness networks, identifying accessible  
742 paths, and quantifying accessibility is outlined in the supplement. Briefly, we randomly  
743 generated 5,000 datasets of five SNPs comprised of either 1) standing genetic variation, 2)  
744 adaptive introgression, 3) *de novo* mutation (scale-eaters only), 4) standing genetic variation +  
745 adaptive introgression, 5) standing genetic variation + *de novo* mutation, or 6) standing genetic  
746 variation + adaptive introgression + *de novo* mutation (scale-eaters only). We additionally  
747 repeated this procedure using both classes of SNPs for molluscivores to determine whether

*Hybridization alters the fitness landscape*

748 genotypic trajectories separating generalists to molluscivores are more accessible than those  
749 between generalists and scale-eaters. Because different sets of sites are sweeping in each  
750 specialist, we conducted these analyses separately for each species. We then constructed  
751 genotypic networks, in which nodes are haplotypes of SNPs encoded in 012 format (0 =  
752 homozygous reference, 1 = heterozygote, 2 = homozygous alternate), and edges link mutational  
753 neighbors. When determining whether a path was accessible or not, we only included paths for  
754 which each mutational step (i.e. each intervening haplotype) between generalist to specialist was  
755 observed in at least one hybrid sample.

756         With these networks, we sought to ask 1) whether molluscivores or scale-eaters are more  
757 accessible to generalists on their respective genotypic fitness landscapes, 2) whether the  
758 ruggedness of the genotypic fitness landscape varied among specialists, and 3) whether  
759 accessibility is contingent upon the source of genetic variation available to natural selection. For  
760 each random network sampled and for each measure of fitness we calculated 1) the minimum  
761 length of accessible paths between a random generalist and specialist sampled from our  
762 sequenced individuals, 2) the number of accessible paths between the same generalist and  
763 specialist pair, 3) the number of nodes, 4) the number of edges in the network, 5) the number of  
764 peaks on the landscape (genotypes with no fitter neighbors (32)), 6) the distance of parental  
765 nodes to these peaks, and 7) the number of accessible paths separating them. Larger networks  
766 often have a greater number of potential paths, including both accessible and inaccessible paths  
767 (Figure 4—figure supplement 1), and we were interested in the relative availability of accessible  
768 adaptive pathways. Consequently, we divided the number of accessible paths in each random  
769 network sampled by the number of nodes. Using our six summary statistics, we tested whether  
770 accessibility and landscape ruggedness differed between networks constructed from

*Hybridization alters the fitness landscape*

771 SGV/Introgression/*De novo* mutations (for scale-eaters) or SGV/Introgression (for  
772 molluscivores). To do so, we calculated the mean and standard error of each summary statistic  
773 across all 5,000 replicates. We then modeled the association between each summary statistic and  
774 species using a logistic regression, whereby species was modeled as a binary response variable  
775 (i.e. scale-eater networks = 0, molluscivore networks = 1), with each measure of accessibility as  
776 the predictor. We arbitrarily treated scale-eater networks as the control, and using the estimated  
777 coefficients obtained an odds ratio (OR) that corresponds to the extent to which molluscivore  
778 networks either have increased (OR > 1) or decreased (OR < 1) accessibility measures relative to  
779 scale-eater networks. Significance was similarly assessed using a likelihood ratio test. Additional  
780 details on this procedure may be found in the supplement. Using the fitted logistic model, we  
781 conducted a likelihood ratio test to quantify significance. To explicitly test the hypothesis that  
782 increasing landscape ruggedness reduced the length of accessible paths to the nearest fitness  
783 peak, we fit a Poisson regression model in R in which the number of fitness peaks predicts the  
784 length of the shortest accessible path between any generalist or specialist node and any fitness  
785 peak on that landscape: `glm(Min. Distance to Peak ~ Number of Peaks, family = "poisson")`.

786 A similar procedure was used to assess whether measures of accessibility (scaled number  
787 of accessible paths, length of the shortest accessible path) and landscape ruggedness (number of  
788 peaks) differed within species among networks constructed from different sources of genetic  
789 variation. Here, networks constructed from SGV were treated as the control, to which all other  
790 networks were compared. For example, to test whether accessibility of the generalist-to-scale-  
791 eater paths are greater in networks constructed from *de novo* mutations than those from SGV, a  
792 logistic model was fitted wherein the response variable for SGV networks was assigned to be 0,  
793 and 1 for *de novo* networks. As before, significance was similarly assessed using a likelihood

*Hybridization alters the fitness landscape*

794 ratio test, but here  $P$ -values were corrected for multiple testing using the false discovery rate  
795 (143). We assessed whether differences in these measures among the two alternate generalist to  
796 specialist trajectories in networks constructed from all three sources of variation were significant  
797 using an ANOVA in R (144). Due to the highly skewed nature of these distributions, post-hoc  
798 pairwise significance was assessed using a nonparametric Kruskal-Wallis one-way analysis of  
799 variance in the agricolae package (145) in R.

800 **Literature Cited**

- 801 1. S. Wright, The roles of mutation, inbreeding, crossbreeding and selection in evolution.  
802 *Sixth Int. Congr. Genet.*, 356–366 (1932).
- 803 2. S. Gavrilets, Evolution and speciation on holey adaptive landscapes. *Trends Ecol. Evol.*  
804 **12**, 307–312 (1997).
- 805 3. S. Gavrilets, “High-dimensional fitness landscapes and speciation” in *Evolution—the*  
806 *Extended Synthesis*, M. Pigliucci, G. B. Müller, Eds. (MIT Press, 2010), pp. 51–64.
- 807 4. E. Svensson, R. Calsbeek, *The adaptive landscape in evolutionary biology*, E. Svensson,  
808 R. Calsbeek, Eds. (Oxford University Press, 2012).
- 809 5. I. Fragata, A. Blanckaert, M. A. Dias Louro, D. A. Liberles, C. Bank, Evolution in the  
810 light of fitness landscape theory. *Trends Ecol. Evol.* **34**, 69–82 (2019).
- 811 6. K. K. Fear, T. Price, The adaptive surface in ecology. *Oikos* **82**, 440–448 (1998).
- 812 7. G. G. Simpson, *Tempo and mode in evolution* (Columbia University Press, 1944).
- 813 8. S. Kauffman, S. Levin, Towards a general theory of adaptive walks on rugged landscapes.  
814 *J. Theor. Biol.* **128**, 11–45 (1987).
- 815 9. R. Lande, S. J. Arnold, The measurement of selection on correlated characters. *Evolution*  
816 **37**, 1226 (1983).
- 817 10. S. J. Arnold, M. E. Pfrender, A. G. Jones, “The adaptive landscape as a conceptual bridge  
818 between micro- and macroevolution” in *Microevolution Rate, Pattern, Process*, (Springer,  
819 Dordrecht, 2001), pp. 9–32.
- 820 11. S. J. Arnold, Performance surfaces and adaptive landscapes. *Integr. Comp. Biol.* **43**, 367–  
821 375 (2003).
- 822 12. D. Schluter, P. R. Grant, Determinants of morphological patterns in communities of  
823 Darwin’s finches. *Am. Nat.* **123**, 175–196 (1984).
- 824 13. D. Schluter, Estimating the form of natural selection on a quantitative trait. *Evolution* **42**,  
825 849–861 (1988).
- 826 14. A. P. Hendry, S. K. Huber, L. F. De León, A. Herrel, J. Podos, Disruptive selection in a  
827 bimodal population of Darwin’s finches. *Proc. R. Soc. B Biol. Sci.* **276**, 753–759 (2009).
- 828 15. M. O. Beausoleil, *et al.*, Temporally varying disruptive selection in the medium ground  
829 finch (*Geospiza fortis*). *Proc. R. Soc. B Biol. Sci.* **286** (2019).
- 830 16. C. W. Benkman, Divergent selection drives the adaptive radiation of crossbills. *Evolution*  
831 **57**, 1176–1181 (2003).
- 832 17. C. H. Martin, P. C. Wainwright, Multiple fitness peaks on the adaptive landscape drive  
833 adaptive radiation in the wild. *Science* **339**, 208–211 (2013).
- 834 18. C. H. Martin, K. J. Gould, Surprising spatiotemporal stability of a multi-peak fitness  
835 landscape revealed by independent field experiments measuring hybrid fitness. *Evol. Lett.*  
836 **4**, 530–544 (2020).
- 837 19. S. Gavrilets, *Fitness landscapes and the origin of species* (Princeton University Press,  
838 2004).
- 839 20. M. Turelli, N. H. Barton, J. A. Coyne, Theory and speciation. *Trends Ecol. Evol.* **16**, 330–  
840 343 (2001).
- 841 21. M. R. Servedio, J. W. Boughman, The role of sexual selection in local adaptation and  
842 speciation. *Annu. Rev. Ecol. Evol. Syst.* **48**, 85–109 (2017).
- 843 22. C. Bank, S. Matuszewski, R. T. Hietpas, J. D. Jensen, On the (un)predictability of a large  
844 intragenic fitness landscape. *Proc. Natl. Acad. Sci. U. S. A.* **113**, 14085–14090 (2016).
- 845 23. S. Wright, Evolution in Mendelian Populations. *Genetics* **16**, 97–159 (1931).

- 846 24. T. Aita, M. Iwakura, Y. Husimi, A cross-section of the fitness landscape of dihydrofolate  
847 reductase. *Protein Eng. Des. Sel.* **14**, 633–638 (2001).
- 848 25. M. C. Whitlock, P. C. Phillips, F. B. G. Moore, S. J. Tonsor, Multiple fitness peaks and  
849 epistasis. <https://doi.org/10.1146/annurev.es.26.110195.003125> **26**, 601–629 (1995).
- 850 26. F. J. Poelwijk, D. J. Kiviet, D. M. Weinreich, S. J. Tans, Empirical fitness landscapes  
851 reveal accessible evolutionary paths. *Nature* **445**, 383–386 (2007).
- 852 27. F. J. Poelwijk, S. Tănase-Nicola, D. J. Kiviet, S. J. Tans, Reciprocal sign epistasis is a  
853 necessary condition for multi-peaked fitness landscapes. *J. Theor. Biol.* **272**, 141–144  
854 (2011).
- 855 28. F. J. Poelwijk, S. Tănase-Nicola, D. J. Kiviet, S. J. Tans, Reciprocal sign epistasis is a  
856 necessary condition for multi-peaked fitness landscapes. *J. Theor. Biol.* **272**, 141–144  
857 (2011).
- 858 29. J. Neidhart, I. G. Szendro, J. Krug, Adaptation in tunably rugged fitness landscapes: The  
859 Rough Mount Fuji model. *Genetics* **198**, 699–721 (2014).
- 860 30. J. Neidhart, I. G. Szendro, J. Krug, Adaptation in tunably rugged fitness landscapes: The  
861 Rough Mount Fuji model. *Genetics* **198**, 699–721 (2014).
- 862 31. D. M. Weinreich, N. F. Delaney, M. A. DePristo, D. L. Hartl, Darwinian evolution can  
863 follow only very few mutational paths to fitter proteins. *Science* **312**, 111–114 (2006).
- 864 32. L. Ferretti, D. Weinreich, F. Tajima, G. Achaz, Evolutionary constraints in fitness  
865 landscapes. *Heredity (Edinb.)* **121**, 466–481 (2018).
- 866 33. J. Franke, A. Klözer, J. A. G. M. de Visser, J. Krug, Evolutionary accessibility of  
867 mutational pathways. *PLoS Comput. Biol.* **7**, 1002134 (2011).
- 868 34. J. A. G. M. De Visser, J. Krug, Empirical fitness landscapes and the predictability of  
869 evolution. *Nat. Rev. Genet.* **2014** *157* **15**, 480–490 (2014).
- 870 35. J. Maynard Smith, Natural selection and the concept of a protein space. *Nat.* **1970**  
871 *2255232* **225**, 563–564 (1970).
- 872 36. C. Brandon Ogbunugafor, A reflection on 50 years of John Maynard Smith’s “Protein  
873 Space.” *Genetics* **214**, 749–754 (2020).
- 874 37. R. A. Fisher, *The genetical theory of natural selection* (Oxford University Press, 1930).
- 875 38. H. A. Orr, The genetic theory of adaptation: A brief history. *Nat. Rev. Genet.* **6**, 119–127  
876 (2005).
- 877 39. M. Karageorgi, *et al.*, Genome editing retraces the evolution of toxin resistance in the  
878 monarch butterfly. *Nature* **574**, 409–412 (2019).
- 879 40. M. A. Siddiq, D. W. Loehlin, K. L. Montooth, J. W. Thornton, Experimental test and  
880 refutation of a classic case of molecular adaptation in *Drosophila melanogaster*. *Nat. Ecol.*  
881 *Evol.* **1**, 25 (2017).
- 882 41. M. A. Siddiq, J. W. Thornton, Fitness effects but no temperature-mediated balancing  
883 selection at the polymorphic *Adh* gene of *Drosophila melanogaster*. *Proc. Natl. Acad. Sci.*  
884 *U. S. A.* **116**, 21634–21640 (2019).
- 885 42. K. S. Singh, *et al.*, The genetic architecture of a host shift: An adaptive walk protected an  
886 aphid and its endosymbiont from plant chemical defenses. *Sci. Adv.* **6**, eaba1070 (2020).
- 887 43. F. Peng, *et al.*, Effects of beneficial mutations in *pykF* gene vary over time and across  
888 replicate populations in a long-term experiment with bacteria. *Mol. Biol. Evol.* **35**, 202–  
889 210 (2018).
- 890 44. Z. D. Blount, C. Z. Borland, R. E. Lenski, Historical contingency and the evolution of a  
891 key innovation in an experimental population of *Escherichia coli*. *Proc. Natl. Acad. Sci.*



- 892 *U. S. A.* **105**, 7899–7906 (2008).
- 893 45. A. I. Khan, D. M. Dinh, D. Schneider, R. E. Lenski, T. F. Cooper, Negative epistasis  
894 between beneficial mutations in an evolving bacterial population. *Science* **332**, 1193–1196  
895 (2011).
- 896 46. P. Nosil, *et al.*, Ecology shapes epistasis in a genotype–phenotype–fitness map for stick  
897 insect colour. *Nat. Ecol. Evol.* **4**, 1673–1684 (2020).
- 898 47. C. H. Martin, P. C. Wainwright, A remarkable species flock of Cyprinodon pupfishes  
899 endemic to San Salvador Island, Bahamas. *Bull. Peabody Museum Nat. Hist.* **54**, 231–241  
900 (2013).
- 901 48. C. H. Martin, Context dependence in complex adaptive landscapes: frequency and trait-  
902 dependent selection surfaces within an adaptive radiation of Caribbean pupfishes.  
903 *Evolution* **70**, 1265–1282 (2016).
- 904 49. B. J. Turner, D. D. Duvernell, T. M. Bunt, M. G. Barton, Reproductive isolation among  
905 endemic pupfishes (Cyprinodon) on San Salvador Island, Bahamas: Microsatellite  
906 evidence. *Biol. J. Linn. Soc.* **95**, 566–582 (2008).
- 907 50. C. H. Martin, P. C. Wainwright, Trophic novelty is linked to exceptional rates of  
908 morphological diversification in two adaptive radiations of cyprinodon pupfish. *Evolution*  
909 **65**, 2197–2212 (2011).
- 910 51. M. E. St. John, K. E. Dixon, C. H. Martin, Oral shelling within an adaptive radiation of  
911 pupfishes: Testing the adaptive function of a novel nasal protrusion and behavioural  
912 preference. *J. Fish Biol.* **97**, 163–171 (2020).
- 913 52. C. H. Martin, J. A. McGirr, E. J. Richards, M. E. St. John, How to investigate the origins  
914 of novelty: Insights gained from genetic, behavioral, and fitness perspectives. *Integr. Org.*  
915 *Biol.* **1** (2019).
- 916 53. M. E. St. John, R. Holzman, C. H. Martin, Rapid adaptive evolution of scale-eating  
917 kinematics to a novel ecological niche. *J. Exp. Biol.* **223** (2020).
- 918 54. C. H. Martin, L. C. Feinstein, Novel trophic niches drive variable progress towards  
919 ecological speciation within an adaptive radiation of pupfishes. *Mol. Ecol.* **23**, 1846–1862  
920 (2014).
- 921 55. E. J. Richards, *et al.*, A vertebrate adaptive radiation is assembled from an ancient and  
922 disjunct spatiotemporal landscape. *Proc. Natl. Acad. Sci.* **118**, e2011811118 (2021).
- 923 56. D. B. Weissman, M. W. Feldman, D. S. Fisher, The rate of fitness-valley crossing in  
924 sexual populations. *Genetics* **186**, 1389–1410 (2010).
- 925 57. D. B. Weissman, M. M. Desai, D. S. Fisher, M. W. Feldman, The rate at which asexual  
926 populations cross fitness valleys. *Theor. Popul. Biol.* **75**, 286–300 (2009).
- 927 58. Y. Iwasa, F. Michor, M. A. Nowak, Stochastic tunnels in evolutionary dynamics. *Genetics*  
928 **166**, 1571–1579 (2004).
- 929 59. A. F. Bitbol, D. J. Schwab, Quantifying the role of population subdivision in evolution on  
930 rugged fitness landscapes. *PLoS Comput. Biol.* **10**, e1003778 (2014).
- 931 60. A. Wagner, “High-dimensional adaptive landscapes facilitate evolutionary innovation” in  
932 *The Adaptive Landscape in Evolutionary Biology*, E. I. Svensson, R. Calsbeek, Eds.  
933 (Oxford University Press, 2012), pp. 271–282.
- 934 61. M. Conrad, The geometry of evolution. *Biosystems* **24**, 61–81 (1990).
- 935 62. A. C. Whibley, *et al.*, Evolutionary paths underlying flower color variation in  
936 *Antirrhinum*. *Science* **313**, 963–966 (2006).
- 937 63. G. Martin, S. F. Elena, T. Lenormand, Distributions of epistasis in microbes fit predictions

- 938 from a fitness landscape model. *Nat. Genet.* 2007 394 **39**, 555–560 (2007).
- 939 64. P. A. Gros, H. Le Nagard, O. Tenaillon, The evolution of epistasis and its links with  
940 genetic robustness, complexity and drift in a phenotypic model of adaptation. *Genetics*  
941 **182**, 277–293 (2009).
- 942 65. S. Hwang, S. C. Park, J. Krug, Genotypic complexity of Fisher’s Geometric Model.  
943 *Genetics* **206**, 1049–1079 (2017).
- 944 66. S. C. Park, S. Hwang, J. Krug, Distribution of the number of fitness maxima in Fisher’s  
945 geometric model. *J. Phys. A Math. Theor.* **53**, 385601 (2020).
- 946 67. R. Froese, D. Pauly, FishBase. *FishBase* (2021).
- 947 68. O. Seehausen, others, Genomics and the origin of species. *Nat. Rev. Genet.* **15**, 176–192  
948 (2014).
- 949 69. S. H. Martin, C. D. Jiggins, Interpreting the genomic landscape of introgression. *Curr.*  
950 *Opin. Genet. Dev.* **47**, 69–74 (2017).
- 951 70. D. A. Marques, J. I. Meier, O. Seehausen, A Combinatorial View on Speciation and  
952 Adaptive Radiation. *Trends Ecol. Evol.* **34**, 531–544 (2019).
- 953 71. T. C. Nelson, W. A. Cresko, Ancient genomic variation underlies repeated ecological  
954 adaptation in young stickleback populations. *Evol. Lett.* **2**, 9–21 (2018).
- 955 72. K. A. Thompson, M. M. Osmond, D. Schluter, Parallel genetic evolution and speciation  
956 from standing variation. *Evol. Lett.* **3**, 129–141 (2019).
- 957 73. J. Mallet, Hybrid speciation. *Nature* **446**, 279–83 (2007).
- 958 74. O. Seehausen, Hybridization and adaptive radiation. *Trends Ecol. Evol.* **19**, 198–207  
959 (2004).
- 960 75. C. Pardo-Diaz, *et al.*, Adaptive introgression across species boundaries in *Heliconius*  
961 butterflies. *PLoS Genet.* **8**, e1002752 (2012).
- 962 76. J. B. Pease, D. C. Haak, M. W. Hahn, L. C. Moyle, Phylogenomics reveals three sources  
963 of adaptive variation during a rapid radiation. *PLoS Biol.* **14**, e1002379 (2016).
- 964 77. E. J. Richards, J. W. Poelstra, C. H. Martin, Don’t throw out the sympatric speciation with  
965 the crater lake water: fine-scale investigation of introgression provides equivocal support  
966 for causal role of secondary gene flow in one of the clearest examples of sympatric  
967 speciation. *Evol. Lett.* **2**, 524–540 (2018).
- 968 78. J. I. Meier, *et al.*, Ancient hybridization fuels rapid cichlid fish adaptive radiations. *Nat.*  
969 *Commun.* **8**, 14363 (2017).
- 970 79. M. D. McGee, *et al.*, The ecological and genomic basis of explosive adaptive radiation.  
971 *Nature* **586**, 75–79 (2020).
- 972 80. I. Irisarri, *et al.*, Phylogenomics uncovers early hybridization and adaptive loci shaping the  
973 radiation of Lake Tanganyika cichlid fishes. *Nat. Commun.* **9**, 1–12 (2018).
- 974 81. E. J. Richards, C. H. Martin, Adaptive introgression from distant Caribbean islands  
975 contributed to the diversification of a microendemic adaptive radiation of trophic  
976 specialist pupfishes. *PLoS Genet.* **13**, e1006919 (2017).
- 977 82. D. H. Alexander, J. Novembre, K. Lange, Fast model-based estimation of ancestry in  
978 unrelated individuals. *Genome Res.* **19**, 1655–1664 (2009).
- 979 83. D. H. Alexander, K. Lange, Enhancements to the ADMIXTURE algorithm for individual  
980 ancestry estimation. *BMC Bioinformatics* **12**, 1–6 (2011).
- 981 84. M. E. Arnegard, *et al.*, Genetics of ecological divergence during speciation. *Nature* **511**,  
982 307–311 (2014).
- 983 85. S. Wang, J. J. Hard, F. Utter, Genetic variation and fitness in salmonids. *Conserv. Genet.*

- 984 3, 321–333 (2002).
- 985 86. R. Leimu, P. Mutikainen, J. Koricheva, M. Fischer, How general are positive relationships  
986 between plant population size, fitness and genetic variation? *J. Ecol.* **94**, 942–952 (2006).
- 987 87. D. Schluter, *et al.*, Fitness maps to a large-effect locus in introduced stickleback  
988 populations. *Proc. Natl. Acad. Sci. U. S. A.* **118**, 1914889118 (2021).
- 989 88. J. A. McGirr, C. H. Martin, Ecological divergence in sympatry causes gene misexpression  
990 in hybrids. *Mol. Ecol.* **29**, 2707–2721 (2020).
- 991 89. Y. Nakamura, *et al.*, Wwp2 is essential for palatogenesis mediated by the interaction  
992 between Sox9 and mediator subunit 25. *Nat. Commun.* **2**, 1–10 (2011).
- 993 90. L. Mork, G. Crump, “Zebrafish craniofacial development: A Window into early  
994 patterning” in *Current Topics in Developmental Biology*, Y. Chai, Ed. (Academic Press  
995 Inc., 2015), pp. 235–269.
- 996 91. T. Manousaki, *et al.*, Parsing parallel evolution: ecological divergence and differential  
997 gene expression in the adaptive radiations of thick-lipped Midas cichlid fishes from  
998 Nicaragua. *Mol. Ecol.* **22**, 650–669 (2013).
- 999 92. S. J. Lim, *et al.*, Taurine is an essential nutrient for juvenile parrot fish *Oplegnathus*  
1000 *fasciatus*. *Aquaculture* **414–415**, 274–279 (2013).
- 1001 93. T. G. Gaylord, A. M. Teague, F. T. Barrows, Taurine supplementation of all-plant protein  
1002 diets for rainbow trout (*Oncorhynchus mykiss*). *J. World Aquac. Soc.* **37**, 509–517 (2006).
- 1003 94. M. Yokoyama, T. Takeuchi, G. S. Park, J. Nakazoe, Hepatic cysteinesulphinate  
1004 decarboxylase activity in fish. *Aquac. Res.* **32**, 216–220 (2001).
- 1005 95. Z. Zhou, *et al.*, Genome-wide association study of growth and body-shape related traits in  
1006 large yellow croaker (*Larimichthys crocea*) using ddRAD sequencing. *Mar. Biotechnol.*  
1007 **21**, 655–670 (2019).
- 1008 96. G. M. Yoshida, J. M. Yáñez, Multi-trait GWAS using imputed high-density genotypes  
1009 from whole-genome sequencing identifies genes associated with body traits in Nile tilapia.  
1010 *BMC Genomics* **22**, 1–13 (2021).
- 1011 97. J. Kulmuni, A. M. Westram, Intrinsic incompatibilities evolving as a by-product of  
1012 divergent ecological selection: Considering them in empirical studies on divergence with  
1013 gene flow. *Mol. Ecol.* **26**, 3093–3103 (2017).
- 1014 98. L. F. S. Fonseca, *et al.*, Gene expression profiling and identification of hub genes in  
1015 Nellore cattle with different marbling score levels. *Genomics* **112**, 873–879 (2020).
- 1016 99. P. Pavlidis, D. Živković, A. Stamatakis, N. Alachiotis, SweeD: Likelihood-based  
1017 detection of selective sweeps in thousands of genomes. *Mol. Biol. Evol.* **30**, 2224–2234  
1018 (2013).
- 1019 100. N. Alachiotis, A. Stamatakis, P. Pavlidis, OmegaPlus: A scalable tool for rapid detection  
1020 of selective sweeps in whole-genome datasets. *Bioinformatics* **28**, 2274–2275 (2012).
- 1021 101. J. A. G. M. De Visser, J. Krug, Empirical fitness landscapes and the predictability of  
1022 evolution. *Nat. Rev. Genet.* **15**, 480–490 (2014).
- 1023 102. M. C. Whitlock, P. C. Phillips, F. B. G. Moore, S. J. Tonsor, Multiple fitness peaks and  
1024 epistasis. <https://doi.org/10.1146/annurev.es.26.110195.003125> **26**, 601–629 (1995).
- 1025 103. R. D. H. Barrett, D. Schluter, Adaptation from standing genetic variation. *Trends Ecol.*  
1026 *Evol.* **23**, 38–44 (2008).
- 1027 104. J. Hermisson, P. S. Pennings, Soft sweeps and beyond: understanding the patterns and  
1028 probabilities of selection footprints under rapid adaptation. *Methods Ecol. Evol.* **8**, 700–  
1029 716 (2017).

- 1030 105. P. W. Hedrick, Adaptive introgression in animals: examples and comparison to new  
1031 mutation and standing variation as sources of adaptive variation. *Mol. Ecol.* **22**, 4606–  
1032 4618 (2013).
- 1033 106. J. Kaplan, The end of the adaptive landscape metaphor? *Biol. Philos.* 2008 235 **23**, 625–  
1034 638 (2008).
- 1035 107. V. O. Pokusaeva, *et al.*, An experimental assay of the interactions of amino acids from  
1036 orthologous sequences shaping a complex fitness landscape. *PLOS Genet.* **15**, e1008079  
1037 (2019).
- 1038 108. L. I. Gong, M. A. Suchard, J. D. Bloom, Stability-mediated epistasis constrains the  
1039 evolution of an influenza protein. *Elife* **2013** (2013).
- 1040 109. L. I. Gong, J. D. Bloom, Epistatically interacting substitutions are enriched during  
1041 adaptive protein evolution. *PLOS Genet.* **10**, e1004328 (2014).
- 1042 110. F. Blanquart, T. Bataillon, Epistasis and the structure of fitness landscapes: Are  
1043 experimental fitness landscapes compatible with fisher’s geometric model? *Genetics* **203**,  
1044 847–862 (2016).
- 1045 111. I. G. Szendro, M. F. Schenk, J. Franke, J. Krug, J. A. G. M. De Visser, Quantitative  
1046 analyses of empirical fitness landscapes. *J. Stat. Mech. Theory Exp.*, P01005 (2013).
- 1047 112. T. C. Nelson, *et al.*, Ancient and recent introgression shape the evolutionary history of  
1048 pollinator adaptation and speciation in a model monkeyflower radiation (Mimulus section  
1049 Erythranthe). *PLoS Genet.* **17**, e1009095 (2021).
- 1050 113. H. Svardal, *et al.*, Ancestral hybridization facilitated species diversification in the lake  
1051 malawi cichlid fish adaptive radiation. *Mol. Biol. Evol.* **37**, 1100–1113 (2020).
- 1052 114. S. Lamichhaney, *et al.*, Rapid hybrid speciation in Darwin’s Finches. *Science* **359**, 224–  
1053 228 (2018).
- 1054 115. P. R. Grant, B. R. Grant, Hybridization increases population variation during adaptive  
1055 radiation. *Proc. Natl. Acad. Sci. U. S. A.* **116**, 23216–23224 (2019).
- 1056 116. N. B. Edelman, J. Mallet, Prevalence and adaptive impact of introgression. *Annu. Rev.*  
1057 *Genet.* **55**, 265–283 (2021).
- 1058 117. P. R. Grant, B. R. Grant, Hybridization increases population variation during adaptive  
1059 radiation. *Proc. Natl. Acad. Sci. U. S. A.* **116**, 23216–23224 (2019).
- 1060 118. J. I. Meier, *et al.*, The coincidence of ecological opportunity with hybridization explains  
1061 rapid adaptive radiation in Lake Mweru cichlid fishes. *Nat. Commun.* **10** (2019).
- 1062 119. J. W. Poelstra, E. J. Richards, C. H. Martin, Speciation in sympatry with ongoing  
1063 secondary gene flow and a potential olfactory trigger in a radiation of Cameroon cichlids.  
1064 *Mol. Ecol.* **27**, 4270–4288 (2018).
- 1065 120. M. Moest, *et al.*, Selective sweeps on novel and introgressed variation shape mimicry loci  
1066 in a butterfly adaptive radiation. *PLoS Biol.* **18**, e3000597 (2020).
- 1067 121. R. C. Lewontin, L. C. Birch, Hybridization as a Source of Variation for Adaptation to  
1068 New Environments. *Evolution* **20**, 315–336 (1966).
- 1069 122. L. H. Rieseberg, M. A. Archer, R. K. Wayne, Transgressive segregation, adaptation and  
1070 speciation. *Heredity (Edinb)*. **83**, 363 (1999).
- 1071 123. K. Kagawa, G. Takimoto, Hybridization can promote adaptive radiation by means of  
1072 transgressive segregation. *Ecol. Lett.* **21**, 264–274 (2018).
- 1073 124. R. Abbott, *et al.*, Hybridization and speciation. *J. Evol. Biol.* **26**, 229–46 (2013).
- 1074 125. N. B. Edelman, J. Mallet, Prevalence and adaptive impact of introgression. *Annu. Rev.*  
1075 *Genet.* **55**, 265–283 (2021).

- 1076 126. Broad Institute, Picard Toolkit (2018).  
1077 127. M. A. DePristo, *et al.*, A framework for variation discovery and genotyping using next-  
1078 generation DNA sequencing data. *Nat. Genet.* **43**, 491–501 (2011).  
1079 128. R. Poplin, *et al.*, Scaling accurate genetic variant discovery to tens of thousands of  
1080 samples. *bioRxiv*, 201178 (2017).  
1081 129. C. D. Marsden, *et al.*, Diversity, differentiation, and linkage disequilibrium: Prospects for  
1082 association mapping in the malaria vector *Anopheles arabiensis*. *G3 Genes, Genomes,*  
1083 *Genet.* **4**, 121–131 (2014).  
1084 130. P. Danecek, *et al.*, The variant call format and VCFtools. *Bioinformatics* **27**, 2156–2158  
1085 (2011).  
1086 131. S. Purcell, *et al.*, PLINK: A tool set for whole-genome association and population-based  
1087 linkage analyses. *Am. J. Hum. Genet.* **81**, 559–575 (2007).  
1088 132. C. T. DiVittorio, *et al.*, Natural selection maintains species despite frequent hybridization  
1089 in the desert shrub *Encelia*. *Proc. Natl. Acad. Sci. U. S. A.* **117**, 33373–33383 (2021).  
1090 133. J. Hereford, A quantitative survey of local adaptation and fitness trade-offs. *Am. Nat.* **173**,  
1091 579–588 (2009).  
1092 134. A. Henningsen, censReg: Censored regression (Tobit) models. (2020).  
1093 135. X. Zhou, M. Stephens, Genome-wide efficient mixed-model analysis for association  
1094 studies. *Nat. Genet.* **44**, 821–824 (2012).  
1095 136. P. Cingolani, *et al.*, Using *Drosophila melanogaster* as a model for genotoxic chemical  
1096 mutational studies with a new program, SnpSift. *Front. Genet.* **3** (2012).  
1097 137. S. X. Ge, D. Jung, D. Jung, R. Yao, ShinyGO: A graphical gene-set enrichment tool for  
1098 animals and plants. *Bioinformatics* **36**, 2628–2629 (2020).  
1099 138. J. A. McGirr, C. H. Martin, Few fixed variants between trophic specialist pupfish species  
1100 reveal candidate cis-regulatory alleles underlying rapid craniofacial divergence. *Mol. Biol.*  
1101 *Evol.* **38**, 405–423 (2021).  
1102 139. T. L. Hedrick, Software techniques for two- and three-dimensional kinematic  
1103 measurements of biological and biomimetic systems. *Bioinspiration and Biomimetics* **3**,  
1104 034001 (2008).  
1105 140. S. N. Wood, Fast stable restricted maximum likelihood and marginal likelihood estimation  
1106 of semiparametric generalized linear models. *J. R. Stat. Soc. Ser. B (Statistical Methodol.*  
1107 **73**, 3–36 (2011).  
1108 141. K. P. Burnham, D. R. Anderson, *Model Selection and Multimodel Inference* (Springer  
1109 New York, 2002).  
1110 142. G. Csardi, T. Nepusz, The igraph software package for complex network research.  
1111 *InterJournal Complex Syst.* **1695**, 1–9 (2006).  
1112 143. Y. Benjamini, Y. Hochberg, Controlling the false discovery rate: a practical and powerful  
1113 approach to multiple testing. *J. R. Stat. Soc. Ser. B*, 289–300 (1995).  
1114 144. R. C. Team, R: A language and environment for statistical computing. (2019).  
1115 145. F. de Mendiburu, agricolae: Statistical procedures for agricultural research (2020).  
1116 146. T. Guillerme, dispRity: A modular R package for measuring disparity. *Methods Ecol.*  
1117 *Evol.* **9**, 1755–1763 (2018).  
1118 147. B. J. Knaus, N. J. Grünwald, VCFR: a package to manipulate and visualize variant call  
1119 format data in R. *Mol. Ecol. Resour.* **17**, 44–53 (2017).  
1120 148. S. Der Yang, T. S. Lin, F. G. Liu, C. H. Liou, Influence of dietary phosphorus levels on  
1121 growth, metabolic response and body composition of juvenile silver perch (*Bidyanus*

*Hybridization alters the fitness landscape*

- 1122 bidyanus). *Aquaculture* **253**, 592–601 (2006).  
1123 149. J. M. Costa, *et al.*, Inadequate dietary phosphorus levels cause skeletal anomalies and alter  
1124 osteocalcin gene expression in Zebrafish. *Int. J. Mol. Sci.* **19**, 364 (2018).  
1125 150. H. Yu, *et al.*, Effects of stocking density and dietary phosphorus levels on the growth  
1126 performance, antioxidant capacity, and nitrogen and phosphorus emissions of juvenile  
1127 blunt snout bream (*Megalobrama amblycephala*). *Aquac. Nutr.* **27**, 581–591 (2021).  
1128

1129 **Appendix 1:**

1130 **Supplementary Methods**

1131 ***Sampling of hybrid individuals***

1132 Samples of hybrid *Cyprinodon* pupfish included herein were first collected following two  
1133 separate fitness experiments, conducted on San Salvador Island in 2011 (17) and 2016 (18)  
1134 respectively. Experiments were carried out in two lakes: Little Lake (LL), and Crescent Pond  
1135 (CP). Following their initial collection at the conclusion of their respective experiments (see (17)  
1136 and (18) for protocols), samples were stored in ethanol. In late 2018, 149 hybrid samples were  
1137 selected for use in this experiment. Of these, 27 are from the experiment conducted in 2011 (14  
1138 from LL, 13 from CP), and the remaining 122 are from the 2016 experiment (58 from LL, 64  
1139 from CP). Due to reduced sample size for some species within Little Lake, we include fish  
1140 obtained from Osprey Lake for downstream analyses comparing hybrids to Little Lake, as the  
1141 two comprise a single, interconnected body of water.

1142

1143 ***Genomic Library Prep***

1144 DNA was extracted from the muscle tissue of hybrids using DNeasy Blood and Tissue kits  
1145 (Qiagen, Inc.); these extractions were then quantified using a Qubit 3.0 fluorometer (Thermo  
1146 Scientific, Inc). Genomic libraries were prepared by the Vincent J. Coates Genomic Sequencing  
1147 Center (QB3) on the automated Apollo 324 system (WaterGen Biosystems, Inc.). Samples were  
1148 fragmented using a Covaris sonicator, and barcoded with Illumina indices. Samples were quality  
1149 checked using a Fragment Analyzer (Advanced Analytical Technologies, Inc.). All samples were  
1150 sequenced to approximately 10x raw coverage on an Illumina NovaSeq.

1151

1152 ***Genotyping and filtering***

1153 Because we are interested in genomic variants found not only within our hybrid samples but  
1154 across San Salvador island and the Caribbean, we conducted genotyping including all 247  
1155 samples from Richards et al. (55). These samples include members of the three species (*C.*  
1156 *variegatus*, *C. brontotheroides*, *C. desquamator*) found on San Salvador Island, as well as  
1157 individuals of *C. variegatus* found throughout the Caribbean, and numerous outgroups (*C.*  
1158 *laciniatus*, *C. higuey*, *C. dearborni*, *Megupsilon aporus*, and *Cualac tesselatus*). We then  
1159 excluded *M. aporus* and *C. tesselatus* along with 18 additional samples for which necessary data  
1160 for downstream analyses were missing (e.g. quality photographs for the collection of  
1161 morphological data). This approach led to the retention of a total of 4,206,786 total SNPs and  
1162 139 hybrid individuals.

1163

1164 ***Morphometrics***

1165 Because the morphological measurements used in the 2013 and 2016 experiments differ slightly,  
1166 we remeasured all sequenced hybrid individuals and up to 30 individuals of each parent species  
1167 for the 30 morphological characters described in Martin & Gould (18), as well as for standard  
1168 length (SL).

1169 For each photograph, unit-scale was obtained by additionally landmarking points on a  
1170 regular grid included in each photograph using DLTdv8a (139). Landmark data (x-y coordinates  
1171 in units of pixels) were subsequently uploaded into R and converted to millimeters (in the case of  
1172 linear measurements) or degrees (for angular measurements) using a custom script.

1173 We then assessed, for each trait, the need for size-correction. That is, we sought to avoid  
1174 an outsized role of body size in downstream interpretation. Thus, if a trait was colinear with SL,

1175 we regressed the two (treating SL as the predictor) and took the residuals. In each case, both SL  
1176 and the response were Log-10 transformed. Subsequently, residuals were scaled such that their  
1177 distribution had a mean of 0, and a standard deviation of 1. Traits that did not need size  
1178 correction were also Log-transformed and unit-scaled.

1179 We used these morphological measurements to estimate two linear discriminant (LD)  
1180 axes that distinguish the generalist, molluscivore, and scale-eater using the LDA function in R.  
1181 That is, we used morphological data from the 165 parental fish to estimate LD scores for each  
1182 individual. Doing so, we were able to correctly assign individual fish to their corresponding  
1183 species with 99.4% accuracy (Figure 2—figure supplement 4-5). Attempting to predict species  
1184 assignment by lake did not improve this prediction accuracy (instead reducing prediction  
1185 accuracy to 98.7%); consequently, we proceeded with the LD axes estimated without accounting  
1186 for lake.

1187 We additionally asked whether 1) specialists were more morphologically constrained  
1188 than generalists and 2) if hybrids were less constrained than the three parental species. To do so,  
1189 we calculated morphological disparity per group using the `dispRity.per.group` function  
1190 implemented in the R package `dispRity` v1.3.3 (146). Specifically, this function calculates the  
1191 median distance between each row (sample) and the centroid of the matrix per group. By  
1192 bootstrapping the data 100 times, we tested the hypothesis that each of the three parental species  
1193 differed significantly in their morphological disparity, first using an ANOVA, followed by a  
1194 post-hoc pairwise t-test to assess pairwise significance in R. We corrected for multiple tests  
1195 using an FDR correction.

1196 To test whether genetic distance predicts morphological distance, we calculated two  
1197 distance matrices. First, we calculated pairwise Euclidean distances between all hybrids using all  
1198 morphological variables. Then, we calculated pairwise genetic distances between all hybrids  
1199 using the final set of SNPs described above with the `genet.dist` function implemented in `vcfR`  
1200 (147). We then fit a simple linear model, regressing genetic distance on morphological distance.

1201

### 1202 ***Estimation of Adaptive Landscapes***

1203 We sought to characterize the extent to which the three measures of fitness are predicted by  
1204 morphology alone and to, in turn, visualize fitness landscapes for our sequenced hybrids. To do  
1205 so, we fitted six generalized additive models (GAMs) using the `mgecv` package v. 1.8.28 (140) in  
1206 R. All models included a thin-plate spline fitted for the two linear discriminant axes. Because we  
1207 have strong *a priori* knowledge that fitness outcomes will be contingent to some extent on  
1208 experiment year and on the lake in which hybrids were placed, we include experiment and lake  
1209 in all fitted models, modeled either as fixed effects, or as an interaction term between the two.  
1210 Additionally, we fitted models that included individual splines for each linear discriminant axis,  
1211 either with or without experiment or lake as a factor smooth. The full list of models and their  
1212 respective fits are included in the supplement (Appendix 1—table 11-13).

1213 For composite fitness, we excluded three SNPs that were within close proximity (i.e. <  
1214 1000bp) to a SNP that was more significantly associated. Because of the reduced number of  
1215 significantly associated SNPs identified for growth (four) as compared to composite fitness (ten),  
1216 we were able to fit and compare all combinations of significantly associated SNPs for the former.  
1217 The best-fit model for composite fitness was also the most complex, including all fitness  
1218 associated SNPs. Thus, to reduce model complexity, we fit one additional model, excluding any  
1219 of the three SNP (fixed effect) that was not significant in the full model. The full range of models



1220 and their associated fits are reported in Appendix 1—table 14-15. As before, predicted fitness  
1221 values across LD space were extracted from the best-fit model and plotted using R.

1222

### 1223 ***Genotypic Fitness Networks***

1224 Recent work has shown that the adaptive radiation of the pupfish of San Salvador island involved  
1225 selection on standing genetic variation, adaptive introgression, and *de novo* mutation (55).  
1226 Furthermore, the specialists on San Salvador Island received approximately twice as much  
1227 adaptive introgression as did generalists on neighboring islands. These findings imply that each  
1228 source of genetic variation may exert a unique influence on the fitness landscape, in turn  
1229 facilitating the radiation. We sought to explore this possibility and so estimated genotypic fitness  
1230 networks using sites previously shown to have undergone hard selective sweeps in specialists. To  
1231 do so, we identified the SNPs in our un-thinned dataset overlapping with sites inferred to have  
1232 undergone selective sweeps (55) to produce two datasets (one for each specialist). We then  
1233 constructed networks using the following procedure:

1234

1235 1) Target SNPs were extracted from the vcf file of all sequenced hybrids and parental species  
1236 from Crescent Pond and Little Lake in 0/1/2 format using VCFtools. That is, individuals  
1237 genotyped as homozygote reference were coded as 0, heterozygotes as 1, and homozygote  
1238 alternatives as 2. Note again that the reference genome used was that of the molluscivore,  
1239 *C. brontotheroides*.

1240 2) These SNPs were subsequently loaded into R, and concatenated into haplotypes, such that  
1241 each sequenced individual has a haplotype. These per-sample haplotypes were  
1242 subsequently associated with metadata, namely the observed binary survival, growth,  
1243 assignment as hybrid or one of the three parental species, and lake of origin.

1244 3) Each haplotype was subsequently collapsed and summarized, such that mean survival,  
1245 growth, and composite fitness are retained for each unique haplotype. Additionally, the  
1246 number of hybrids, generalists, molluscivores and scale-eaters that have the haplotype were  
1247 recorded.

1248 4) The distance, in number of mutational steps was then calculated for each pairwise  
1249 combination of haplotypes. For example, the distance between haplotype 000 and 001 is a  
1250 single mutational step, whereas haplotypes 000 and 002 are two steps away.

1251 5) Lastly, we constructed networks using the R package igraph v. 1.2.4.1 (142). Specifically,  
1252 nodes represent haplotypes, and edges are drawn between haplotypes that are mutational  
1253 neighbors (i.e. are a single mutational step away). Nodes present in hybrids were colored  
1254 and sized proportional to their respective mean fitness. Nodes present only in parental  
1255 species were colored according to the species in which that haplotype is unique to.

1256

### 1257 ***Estimation of evolutionary accessibility***

1258 The large number of SNPs in our dataset above raises numerous challenges in the visualization  
1259 and summarization of fitness networks. Perhaps most significant, is that as the number of sites  
1260 assessed increases, the sequence space increases vastly; the number of potential haplotypes is  
1261 defined by 3 to the power of the number of SNPs, and the number of potential edges is defined  
1262 by the number of haplotypes choose 2. Consequently, networks constructed from a larger  
1263 number of focal SNPs are comprised of haplotypes that are separated on average by more  
1264 mutational steps than those constructed from fewer SNPs. Because we can only interpret the  
1265 fitness consequences of evolutionary trajectories for which we have data along each mutational

1266 step, we restricted analysis to haplotypes that are mutational neighbors (i.e., separated by a single  
1267 mutational step).

1268 To do so, we developed a permutation approach to construct fitness networks from SNPs  
1269 that were sourced from the three sources of genetic variation defined above as well as all  
1270 possible combinations including standing variation (i.e. standing genetic variation + adaptive  
1271 introgression and/or de novo mutation). Specifically, from each set we sampled five SNPs up to  
1272 5000 times. For networks constructed from combinations of sources (e.g. SGV + introgression),  
1273 we ensured that at least one of each source was present. To do so, we generated 1000 random  
1274 sets of SNPs for all possible combinations (e.g. 1 SGV - 4 introgression, 2 SGV - 3  
1275 introgression, etc). Then, we sampled up to 5000 of these combinations; these samples comprise  
1276 our permutations. Then, from each permutation, we constructed fitness networks using the five  
1277 steps defined above; these networks served as the subsequent assessment of evolutionary  
1278 accessibility of genotypic trajectories separating the generalists from either specialist. Edges  
1279 were only drawn such that the network is directed; that is, edges were drawn from low to higher  
1280 or equal fitness nodes.

1281 We constructed networks using both parental species and hybrids. For each trajectory  
1282 under consideration (generalist → molluscivore & generalist → scale-eater), we first identified  
1283 all generalist to specialist trajectories that are connected by accessible (monotonically increasing)  
1284 paths. From these connected generalist-specialist node pairs, we randomly sampled a single pair.  
1285 We then identified the number and length of accessible paths separating the generalist node from  
1286 the specialist node and recorded these values using the “all\_simple\_paths” function in igraph and  
1287 excluded any paths that traversed through haplotypes not found in any hybrid (i.e., exclusive to  
1288 parental species) and thus had no information on fitness.

1289 Specifically, two node paths (a single mutational step from generalist to specialist) were  
1290 allowed only if both parental nodes (SNP haplotypes) were also observed in hybrids, with fitness  
1291 data. Three-node paths were allowed if hybrid fitness data was present for at least one of the  
1292 parental nodes and the intervening node between the two parental nodes. Paths that were four  
1293 nodes or longer were allowed only if all intervening nodes between parental nodes had  
1294 associated hybrid fitness data.

1295 We additionally calculated the number of peaks on the genotypic fitness landscape, as  
1296 well as the number of accessible paths between parental nodes and these peaks, and the  
1297 minimum distance from parental nodes to a peak on the landscape. We define ‘peaks’ on the  
1298 genotypic fitness landscape as genotypes (SNP haplotypes) with no-fitter neighboring genotype,  
1299 follow the definition of Ferretti et al. (32). This definition is inclusive of nodes/genotypes that  
1300 are equal in fitness to their neighbors, which may be fitter than all other neighboring nodes. We  
1301 conservatively excluded nodes that shared only a single neighbor.

## 1302 **Supplementary Results**

### 1304 *Population ancestry associations with fitness*

1305 When repeating our test for an association between fitness measures and ancestry proportions as  
1306 estimated from a supervised ADMIXTURE analyses, we recovered similar results with one  
1307 exception; generalist ancestry was significantly associated with growth rate (generalist:  $P =$   
1308 0.021). Admixture proportions estimated from an unsupervised analysis did not significantly  
1309 predict any measure of fitness when only using hybrids from the second field experiment  
1310 (Appendix 1—table 4) (18). Genome-wide PC1 was associated with composite fitness ( $P =$   
1311 0.004) and survival ( $P < 0.001$ ), whereas PC2 was not (Appendix 1—table 5). However, PC1

1312 largely explains differences among lakes (Figure 1c); thus, the positive correlation between PC1  
1313 and fitness is likely explained by the previously described overall differences in survival  
1314 observed between the two lakes in past experiments (17, 18).

1315

1316 *Genomic associations recovered for composite fitness and growth, not survival*

1317 Whereas we identified 132 SNPs that were associated with composite fitness, only 58 were  
1318 associated with growth and none were associated with survival. Of the SNPs associated with  
1319 growth, only four remained significant using the conservative Bonferroni threshold. Across all  
1320 significant sites (either via FDR or Bonferroni correction) a total of 11 were shared across  
1321 analyses. The only gene proximate to a growth associated SNP was *csad*. Lastly, we found a  
1322 single gene shared between our study and the 125 ecological DMIs (putative genetic  
1323 incompatibilities that are differentially expressed among specialists and misexpressed in F1  
1324 hybrids) presented in McGirr & Martin (88). This gene, associated with growth (but not  
1325 composite fitness) in our study, is *mettl21e*.

1326 When considering SNPs found to be associated with growth, we did not identify any gene  
1327 ontologies that were significantly enriched at a False Discovery Rate < 0.01. However, looking  
1328 at those enriched at an FDR < 0.05, we do observe a number of ontologies related to biosynthetic  
1329 processes, and regulation of metabolic processes (Figure 2—figure supplement 3). Specifically,  
1330 the greatest (and most significant) enrichment was for that of phosphorus and phosphate  
1331 containing compound metabolic processes and their regulation. Phosphorous deficiencies have  
1332 previously been associated with poor growth in silver perch (*Bidyanus bidyanus*: (148)) and  
1333 skeletal deformities (including vertebral compression and craniofacial deformities) in zebrafish  
1334 (*Danio rerio*: (149)). Similarly, blunt snout bream (*Megalobrama amblycephala*) exhibited  
1335 greater growth rates with increasing phosphorous levels in their diets (150). In short, enrichment  
1336 of growth-associated SNPs for ontologies pertaining to phosphorous metabolism is consistent  
1337 with the substantial literature documenting that phosphorous availability and metabolism is a  
1338 determinant of growth in fishes.

1339

1340 *Morphological variation within sampled hybrids*

1341 As in the previous two experiments, there is a relative paucity of hybrids exhibiting the  
1342 morphologies that characterize either specialist. Rather, most hybrids fall near the generalists,  
1343 with a number exhibiting transgressive morphologies (Figure 2—figure supplement 5a). As  
1344 expected, both specialists exhibit reduced morphological disparity as compared to generalists,  
1345 and hybrids show the greatest (Figure 2—figure supplement 5b). That is, the specialists appear  
1346 more morphologically constrained than generalists, falling on average closer to the group  
1347 centroid. Interestingly molluscivores exhibit the least disparity, even less so than scale-eaters.

1348

1349 *Fitness-associated SNPs influence shape of the adaptive landscape*

1350 Using morphology alone, the best fit generalized additive model for survival, growth, and  
1351 composite fitness were simpler than the model for composite fitness using both morphology and  
1352 fitness-associated SNPs (Appendix 1—table 11-13). For survival and composite fitness (Figure  
1353 2—figure supplement 6a-6b), this model included a thin-plate spline for LD1 & LD2, with  
1354 experiment and lake included as fixed effects. The resultant landscape was also similar for these  
1355 two analyses, supporting an interpretation of directional selection, favoring molluscivores. For  
1356 growth, the best-fit model had the thin-plate spline for LD1 & LD2, but included an interaction  
1357 term between experiment and lake (Figure 2—figure supplement 6c; Appendix 1—table 12). In

*Hybridization alters the fitness landscape*

1358 contrast to the previous two models, the landscape predicted using growth as our proxy of fitness  
1359 supported an interpretation of directional selection in favor of hybrids most similar to generalists,  
1360 and to a lesser extent, scale-eaters.

1361 Notably, model selection using AICc invariably supported the inclusion of fitness  
1362 associated SNPs for growth and composite fitness (Appendix 1—table 14-15). For growth, the  
1363 best-fit model including genotypes was an improvement of 22.99 AICc over the model including  
1364 morphology alone, whereas for composite fitness, the improvement was 94.527 AICc.  
1365 Interestingly, the best-fit models and growth including associated SNPs was similar to that of the  
1366 landscape without fitness-associated SNPs, but largely supported an interpretation of directional  
1367 selection in favor of scale-eaters, and to a lesser extent generalists.

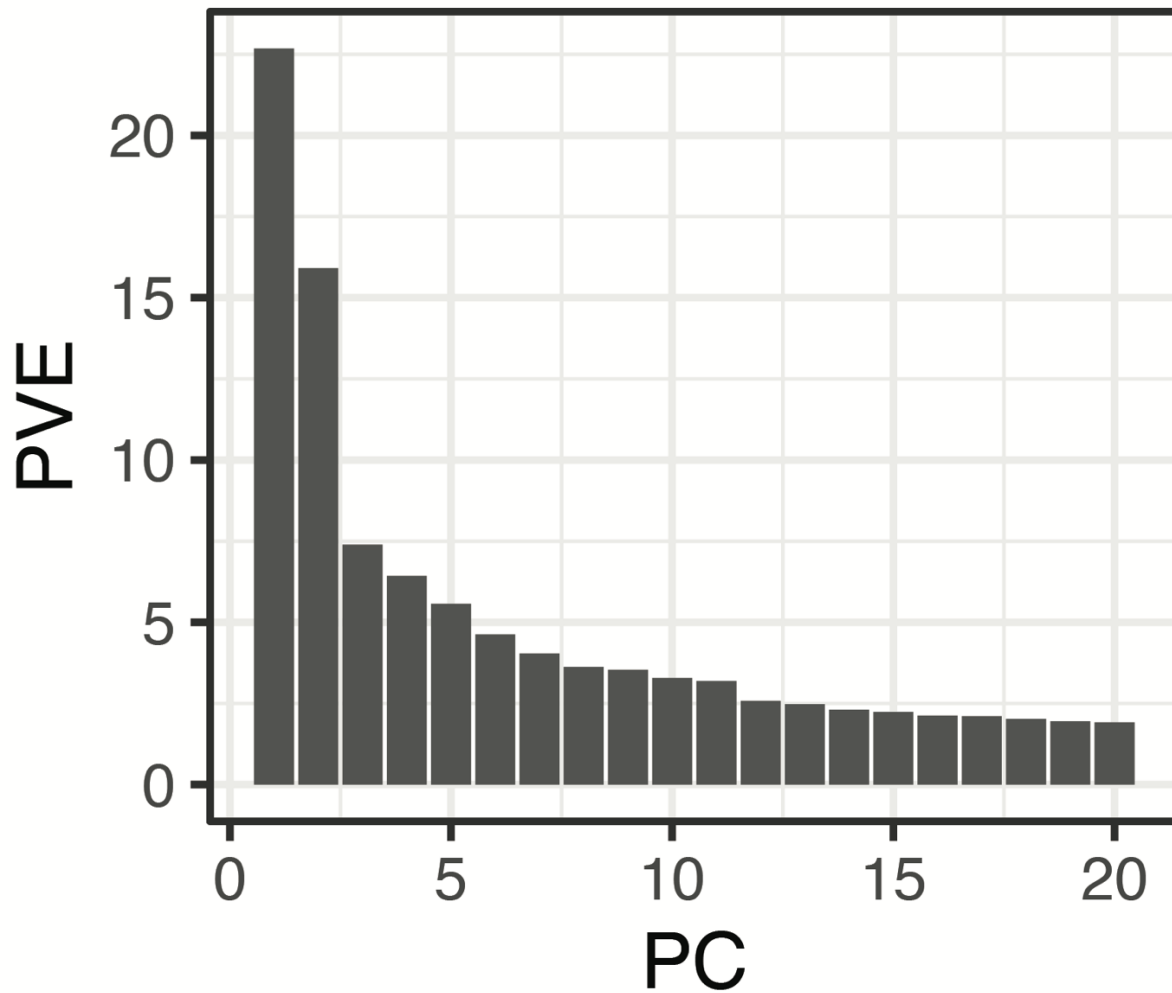

**Figure 1—figure supplement 1. Proportion (%) genetic variance explained by the first 20 Principal Components obtained using all SNPs and individuals from Crescent Pond, Little Lake, and Osprey Lake, as well as experimental hybrids. The first two principal component axes are plotted in Figure 1.**

*Hybridization alters the fitness landscape*

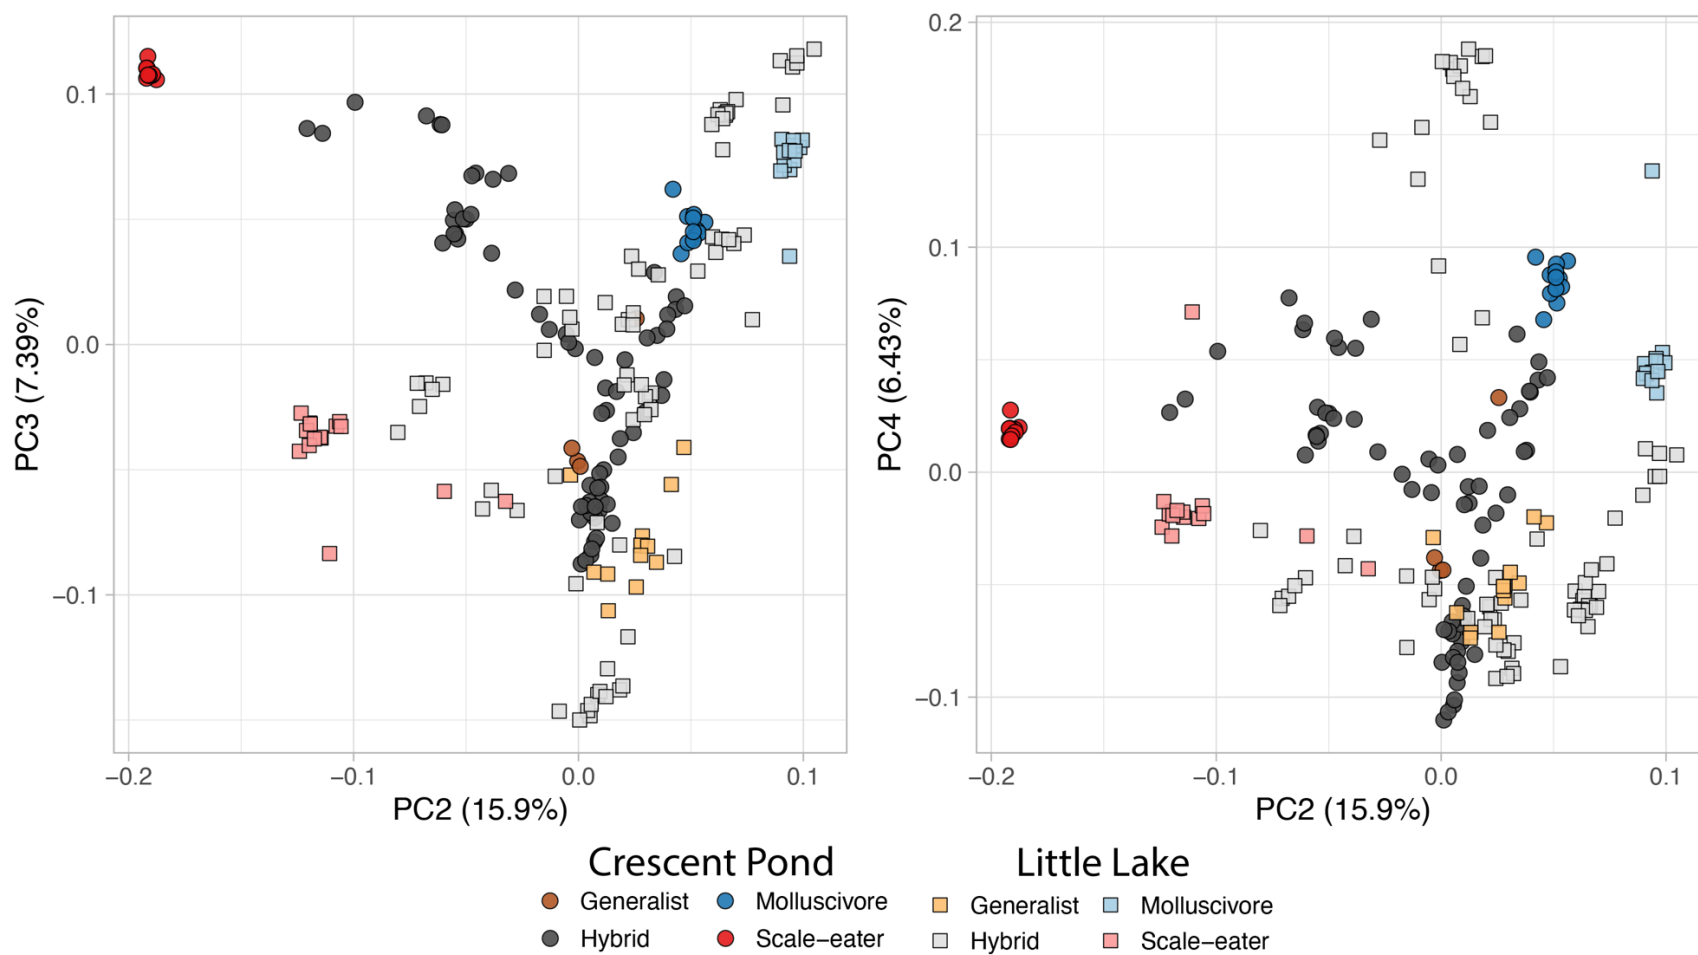

**Figure 1—figure supplement 2. Principal components two, three, and four.**

*Hybridization alters the fitness landscape*

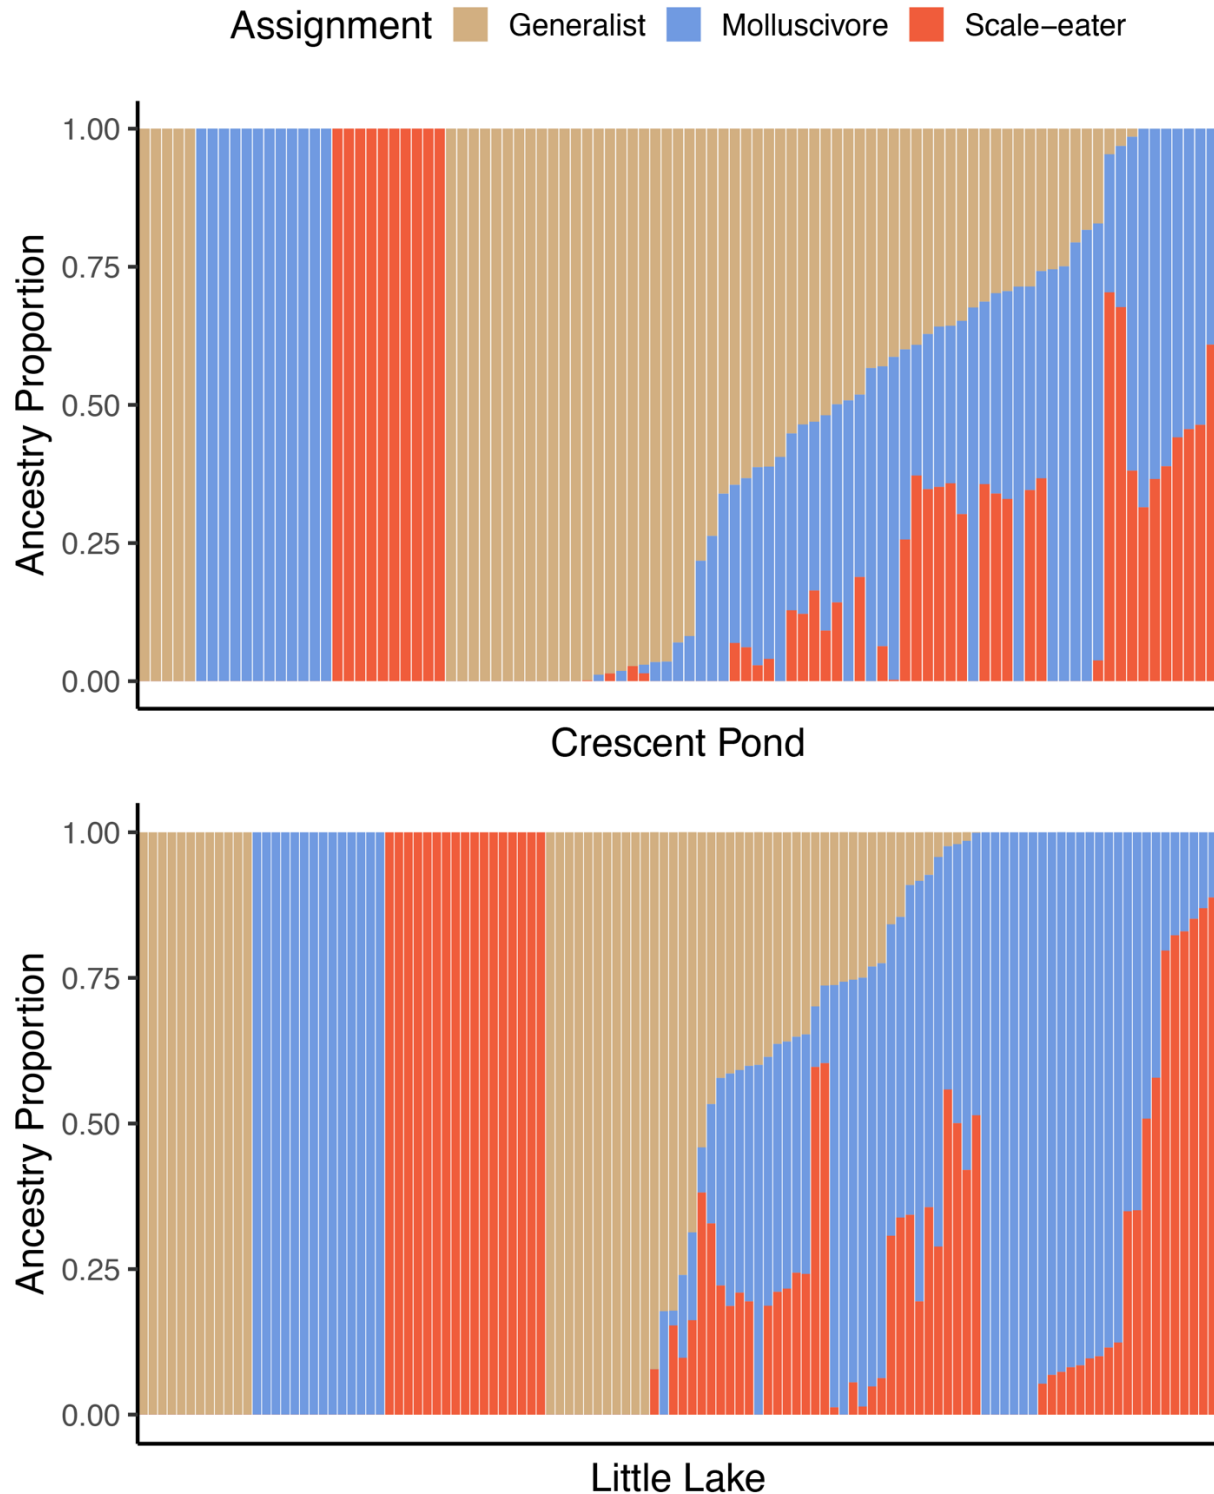

**Figure 1—figure supplement 3. Supervised ADMIXTURE analyses for Crescent Pond (top) and Little Lake (bottom).** Sampled individuals of each species (leftmost) individuals were assigned to one of three populations, whereas ancestry proportions were estimated for all resequenced hybrid individuals from field experiments. Colors correspond to probability of assignment to one of three assumed populations/species ( $K = 3$ ) in this analysis).

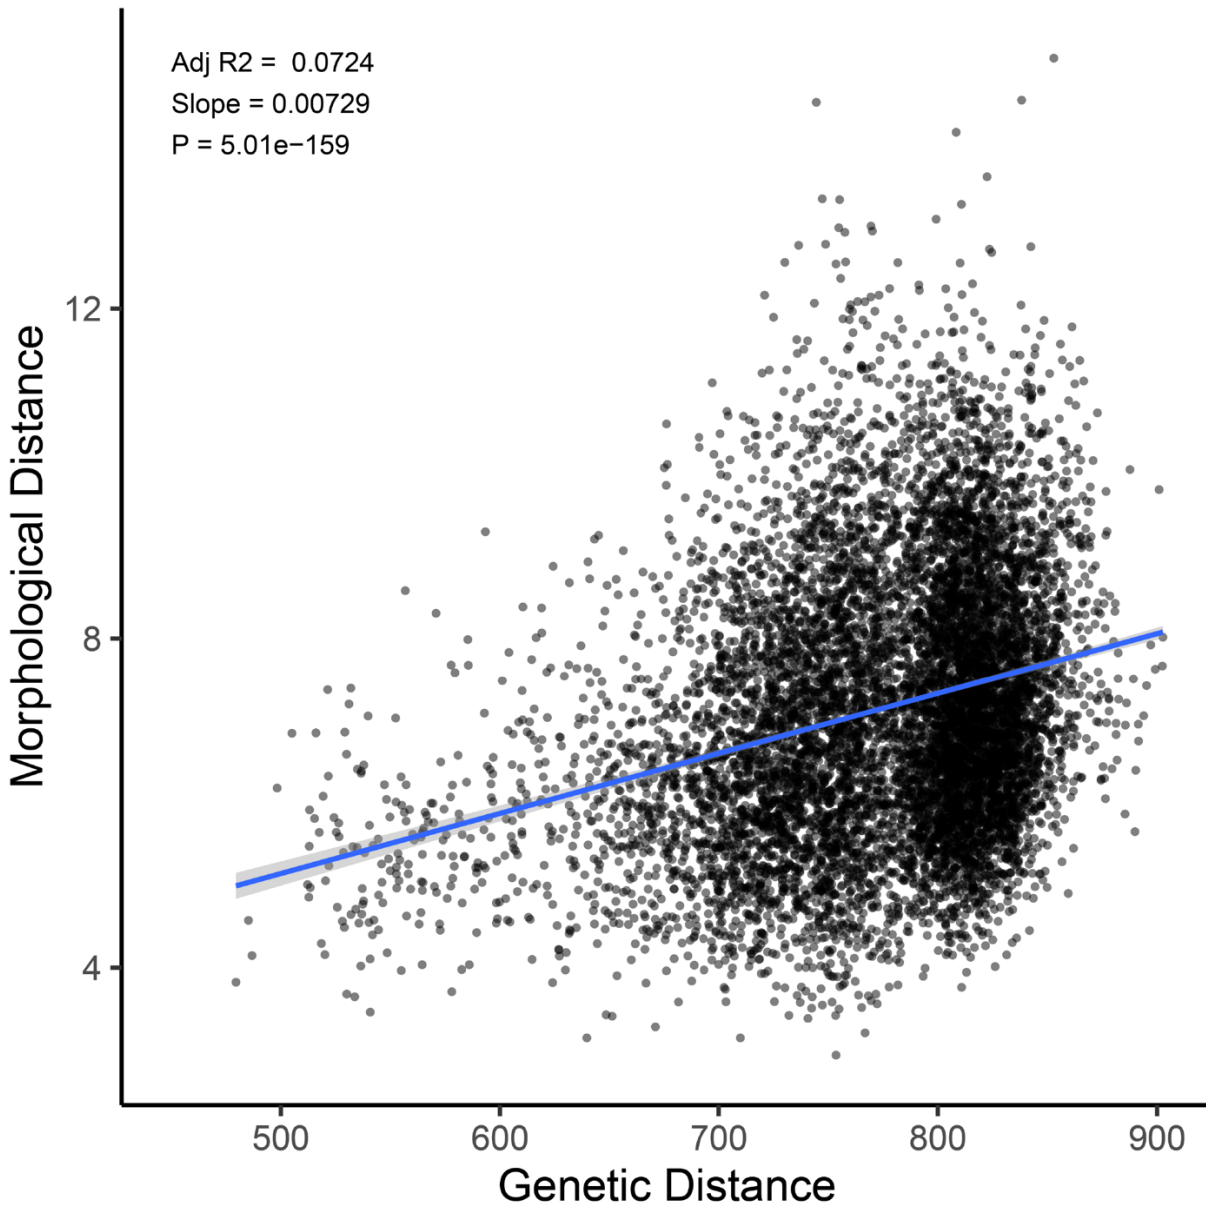

**Figure 1—figure supplement 4. Genetic distance predicts morphological distance among sampled hybrids.**



Hybridization alters the fitness landscape

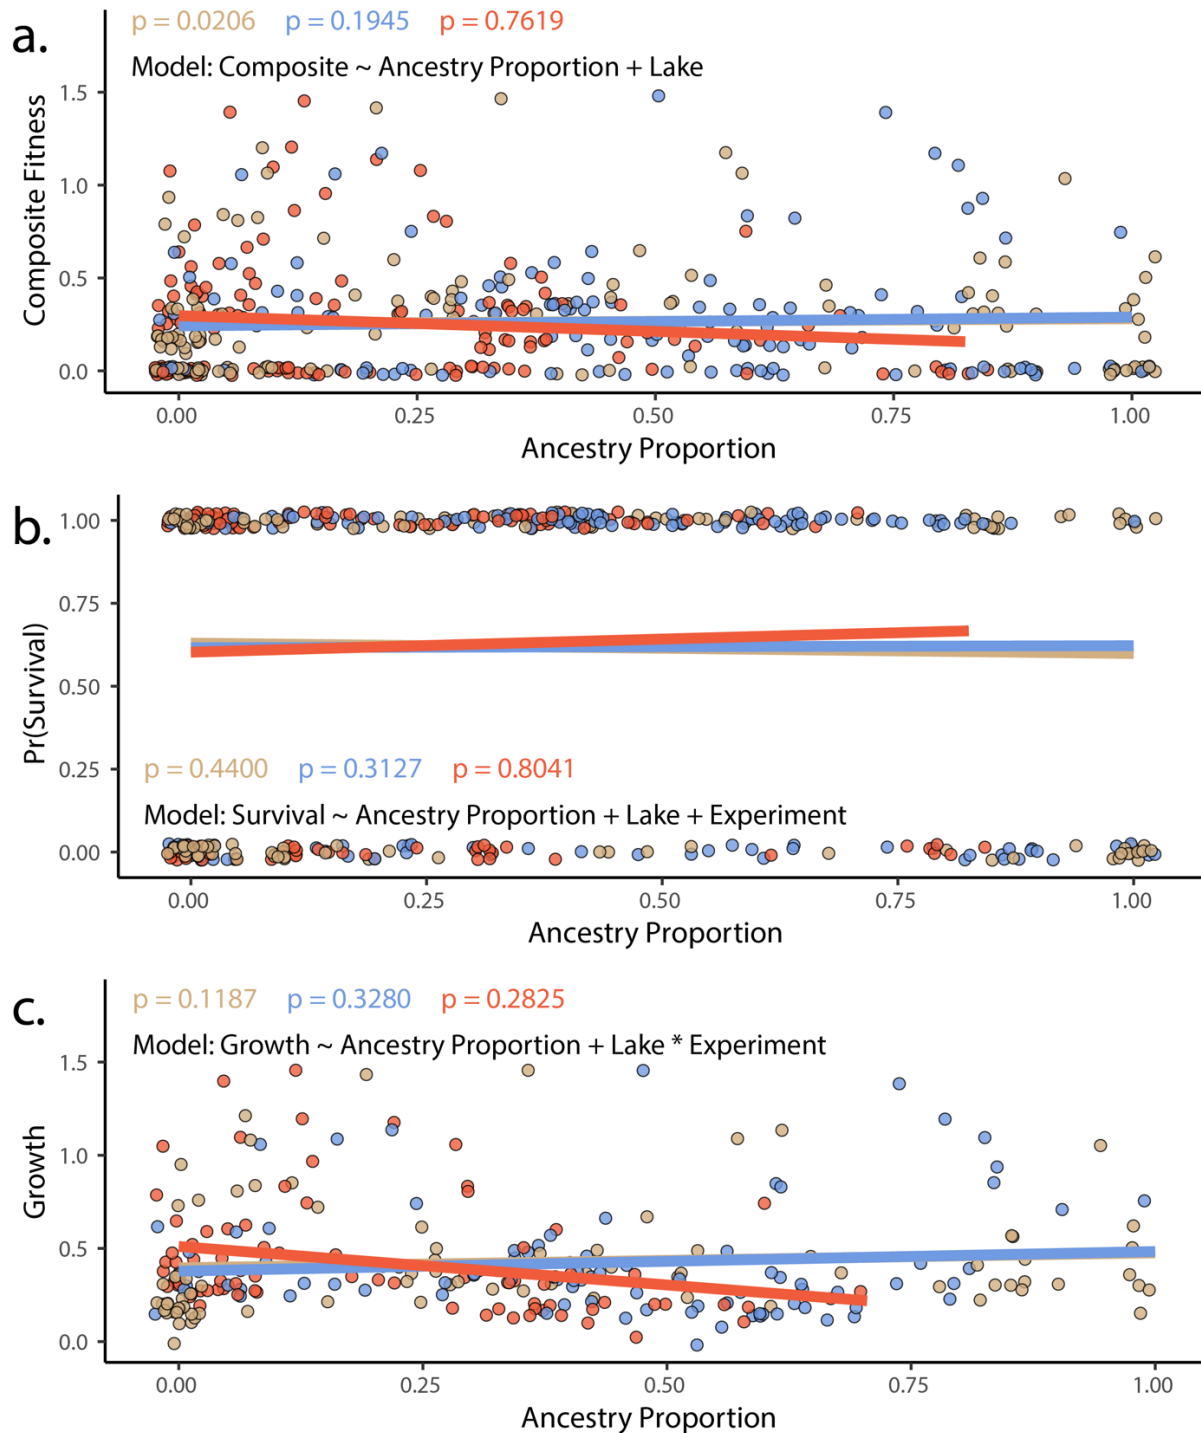

**Figure 1—figure supplement 5. The proportion of generalist or specialist ancestry in hybrids did not predict in experimental hybrids using either A) composite fitness (tobit/zero-censored), B) survival (binomial) or C) growth (gaussian).** Results of a generalized in which survival (modeled as a binomial) is predicted by ancestry proportion, including lake and experiment as fixed effects. Points represent individual hybrids, with each individual represented by two points, one indicating their respective scale-eater (salmon, and molluscivore (blue) ancestry proportions.  $P$ -values correspond to the effect of each type of ancestry (scale-eater – red, molluscivore – blue) on survival probability. Lines are predicted values and are colored according to species.

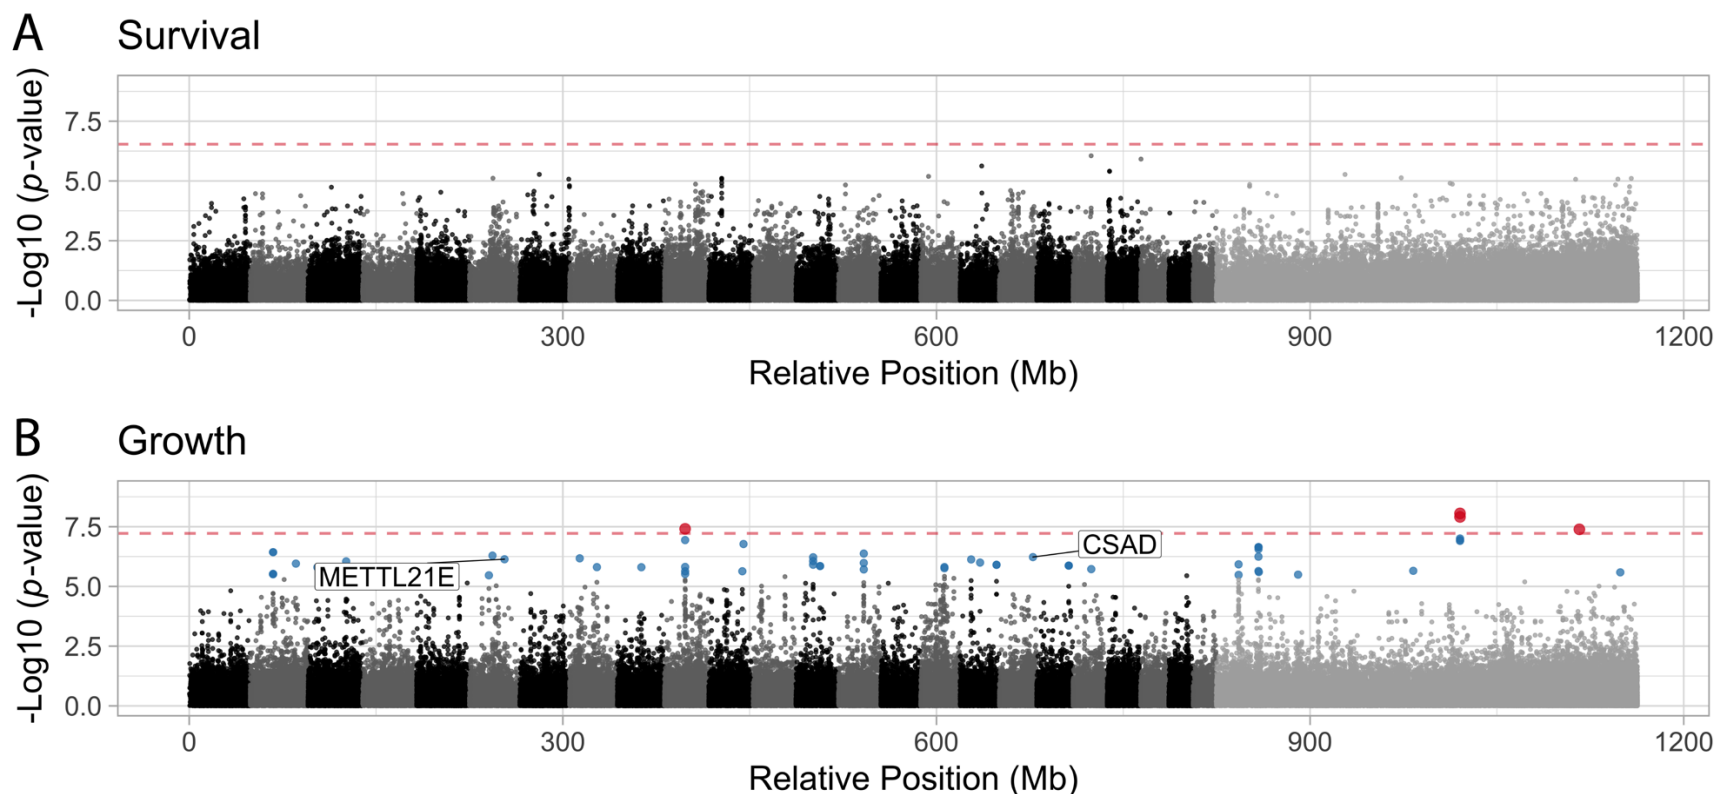

**Figure 2—figure supplement 1. Manhattan plots illustrating the strength of association between individual SNPs and either Survival (A) or Growth (B) as inferred by GEMMA.** Significant associations are highlighted in blue (FDR < 0.05) or red (Bonferroni correction  $P < 0.05$ ). The dashed red line indicates the threshold for significance following Bonferroni p-value adjustment. METTL21E and CSAD are both highly differentiated ( $F_{ST} > 0.95$ ) among specialists, differentially expressed. METTL21E is also misexpressed in F1 hybrids, meaning it exhibits gene expression that is higher or lower than observed in both parental species (88), indicating it is involved in intrinsic incompatibilities.

*Hybridization alters the fitness landscape*

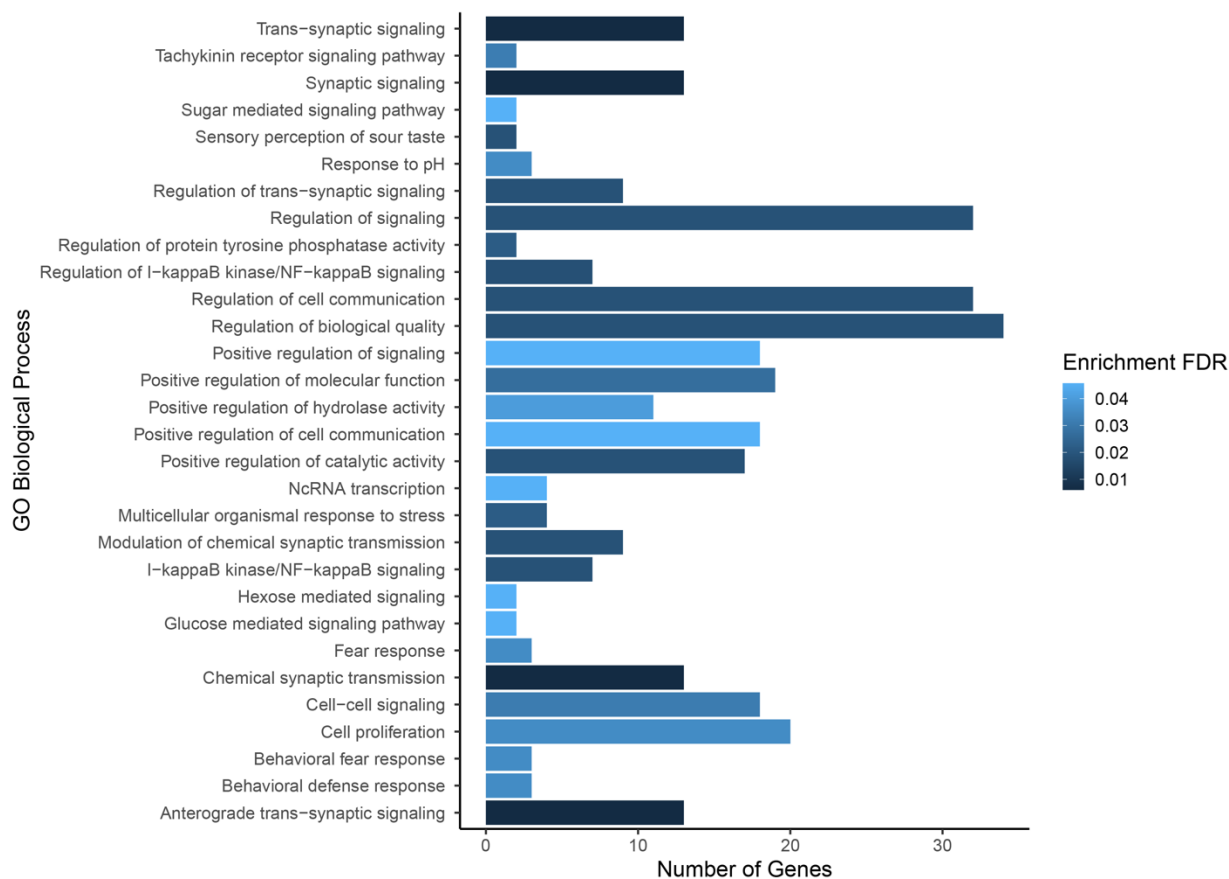

**Figure 2—figure supplement 2. Gene ontology enrichment for SNPs found to be associated with composite fitness.** Darker colors indicate ontologies that are more significantly enriched following FDR correction. Length of bar is proportional to the number of genes assigned to an ontology.

*Hybridization alters the fitness landscape*

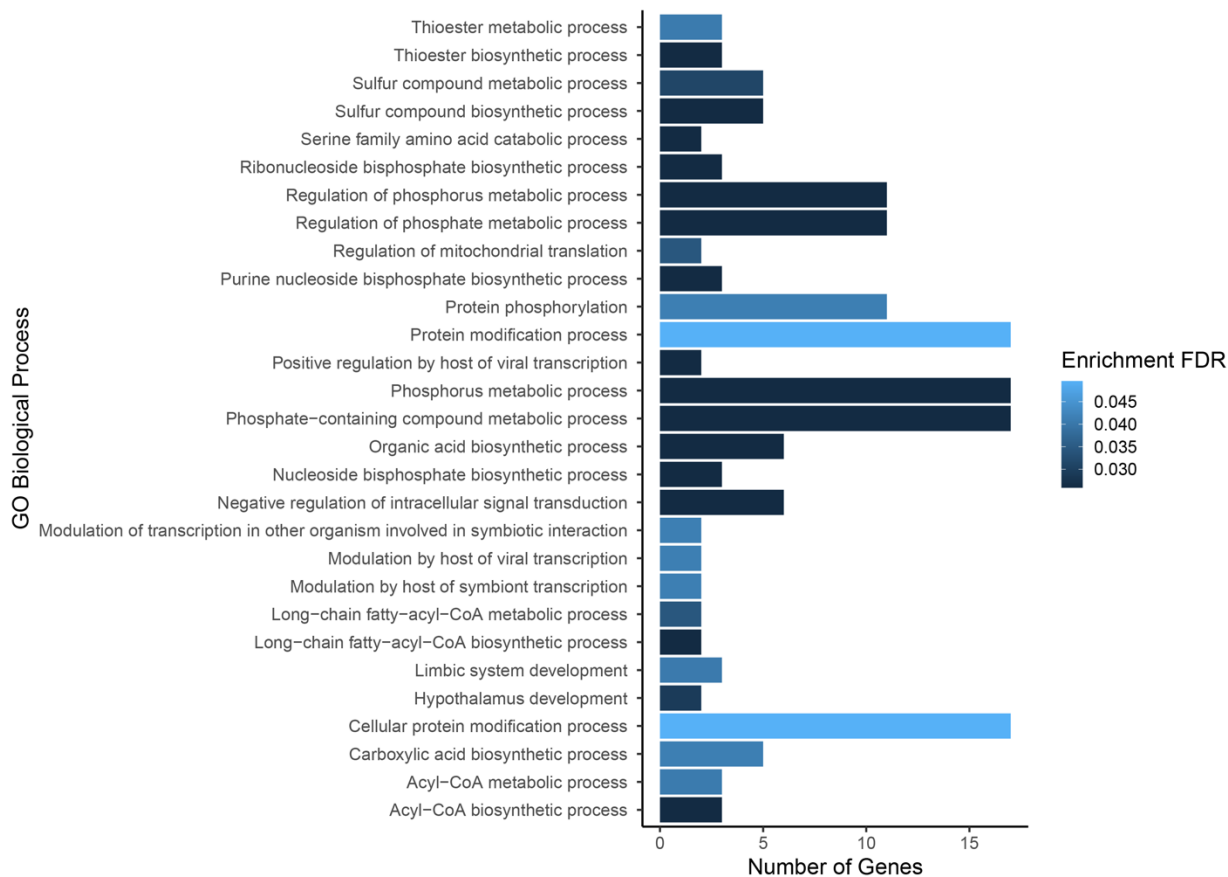

**Figure 2—figure supplement 3. Gene ontology enrichment for SNPs found to be associated with growth.** Darker colors indicate ontologies that are more significantly enriched following FDR correction. Length of bar is proportional to the number of genes assigned to an ontology.

*Hybridization alters the fitness landscape*

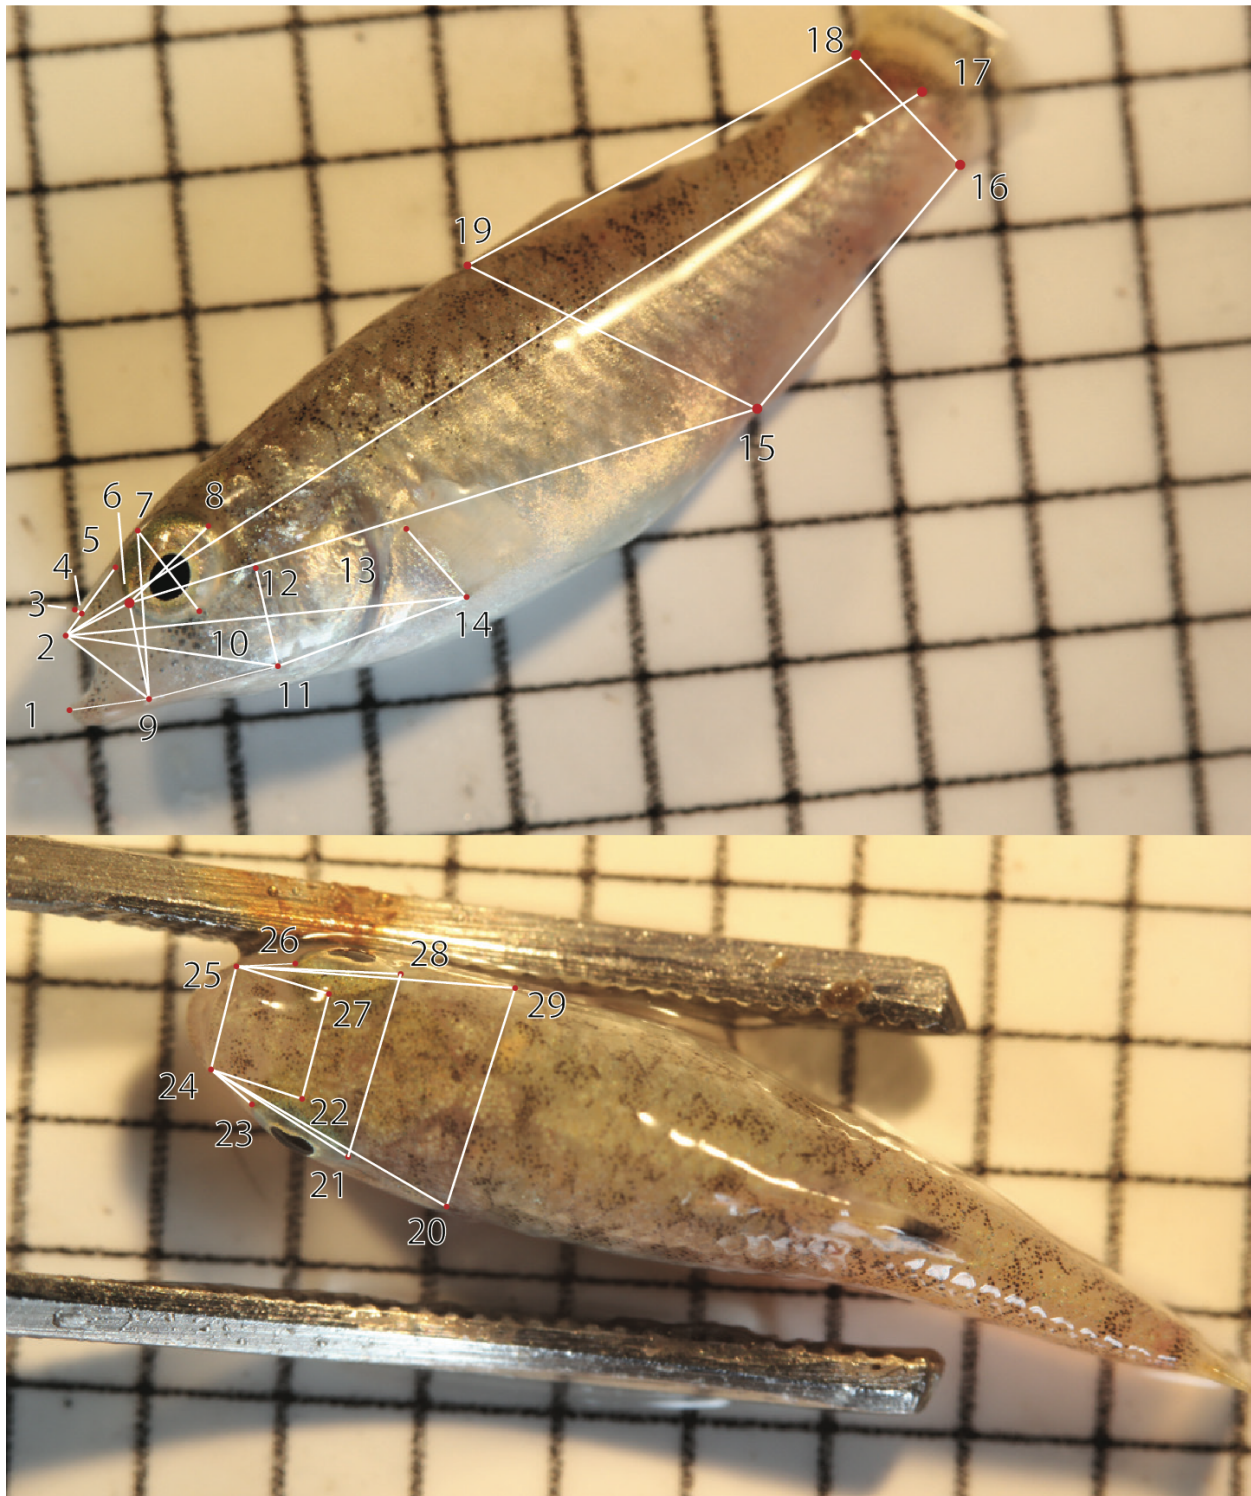

**Figure 2—figure supplement 4.** The 29 landmarks used to digitally measure thirty traits plus standard length using DLTDV8a (139). The corresponding traits are shown in Appendix 1—table 7.

*Hybridization alters the fitness landscape*

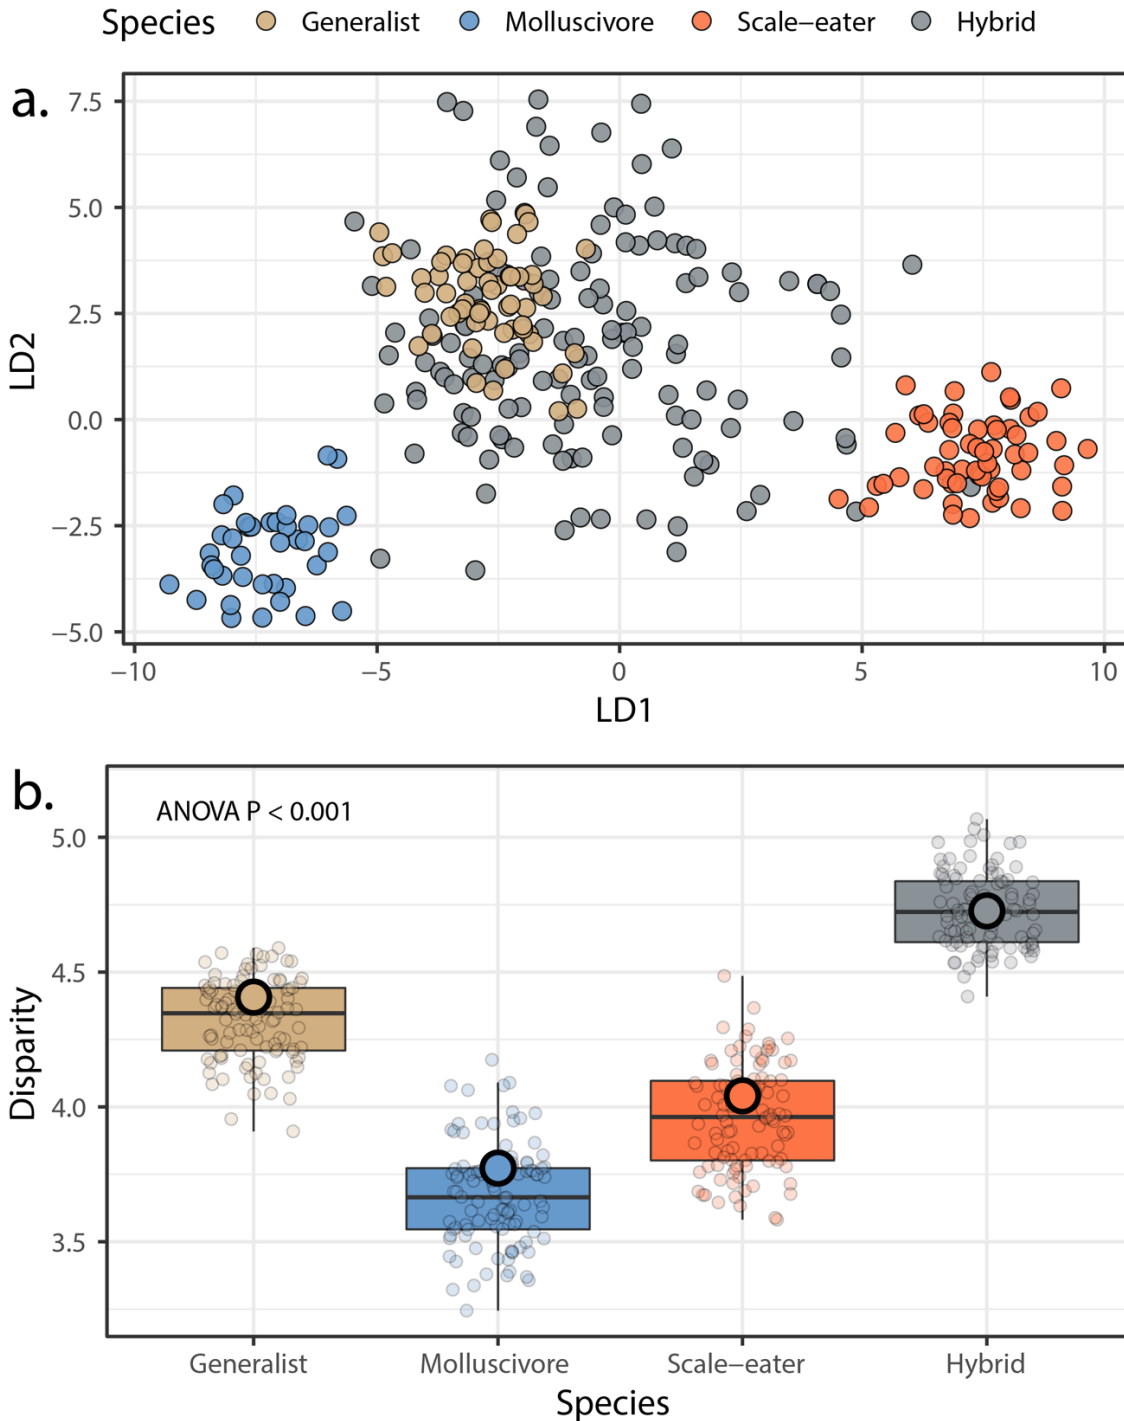

**Figure 2—figure supplement 5. Morphological variation in the three San Salvador Island pupfish species and their experimentally produced hybrids.** **A.** Linear discriminant (LD) morphospace. Parent species and hybrids are plotted using the two LD axes that together serve to distinguish species with 99.4% accuracy. **B.** Within-group disparity calculated as the median distance between each individual and the groups centroid. Small, semitransparent points are the result of 100 bootstrap replicates, and are summarized by box plots, which in turn show the median and interquartile ranges of these bootstrap replicates. Large, opaque points are the observed disparities using the full dataset per group. All pairwise comparisons using t-tests following correction for the false discovery rate were significant ( $P < 0.001$ ).

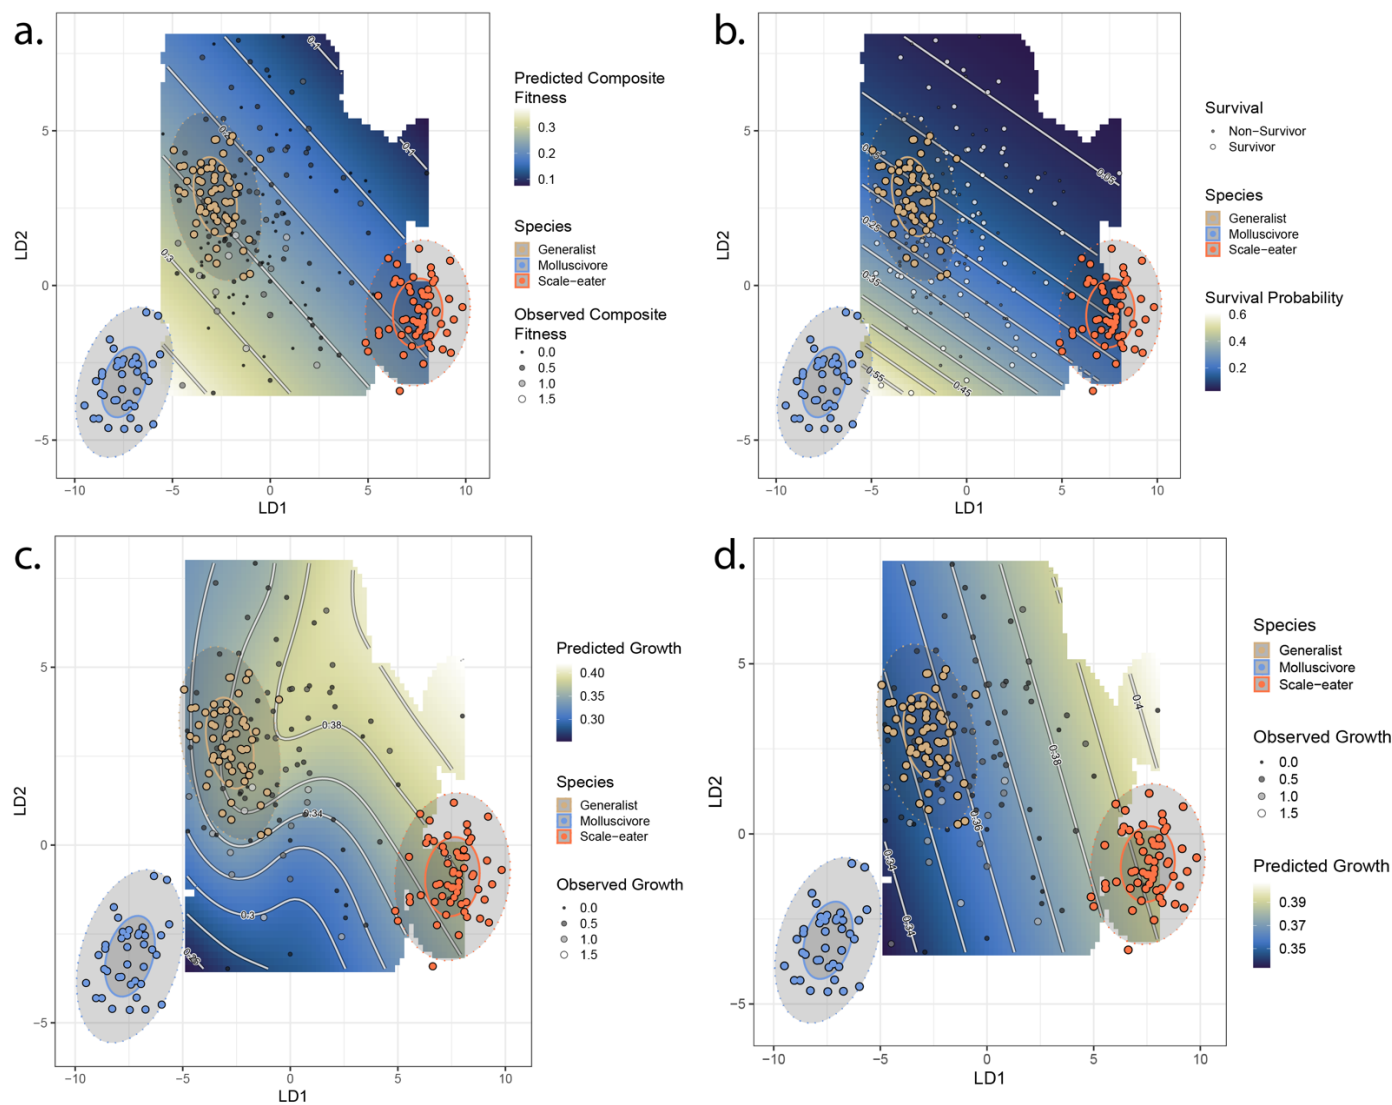

**Figure 2—figure supplement 6. Best-fit fitness landscapes for composite fitness (a) survival (b), and growth without associated SNPs (c) and growth including associated SNPs (d).** Colored points indicate locations of parent species in LD morphospace, and ellipses indicate their 50% (solid) and 95% (dotted) confidence intervals. Grey points indicate location of hybrid individuals, with size proportional to their fitness measure. Cooler colors on the adaptive landscape indicate lower predicted fitness.

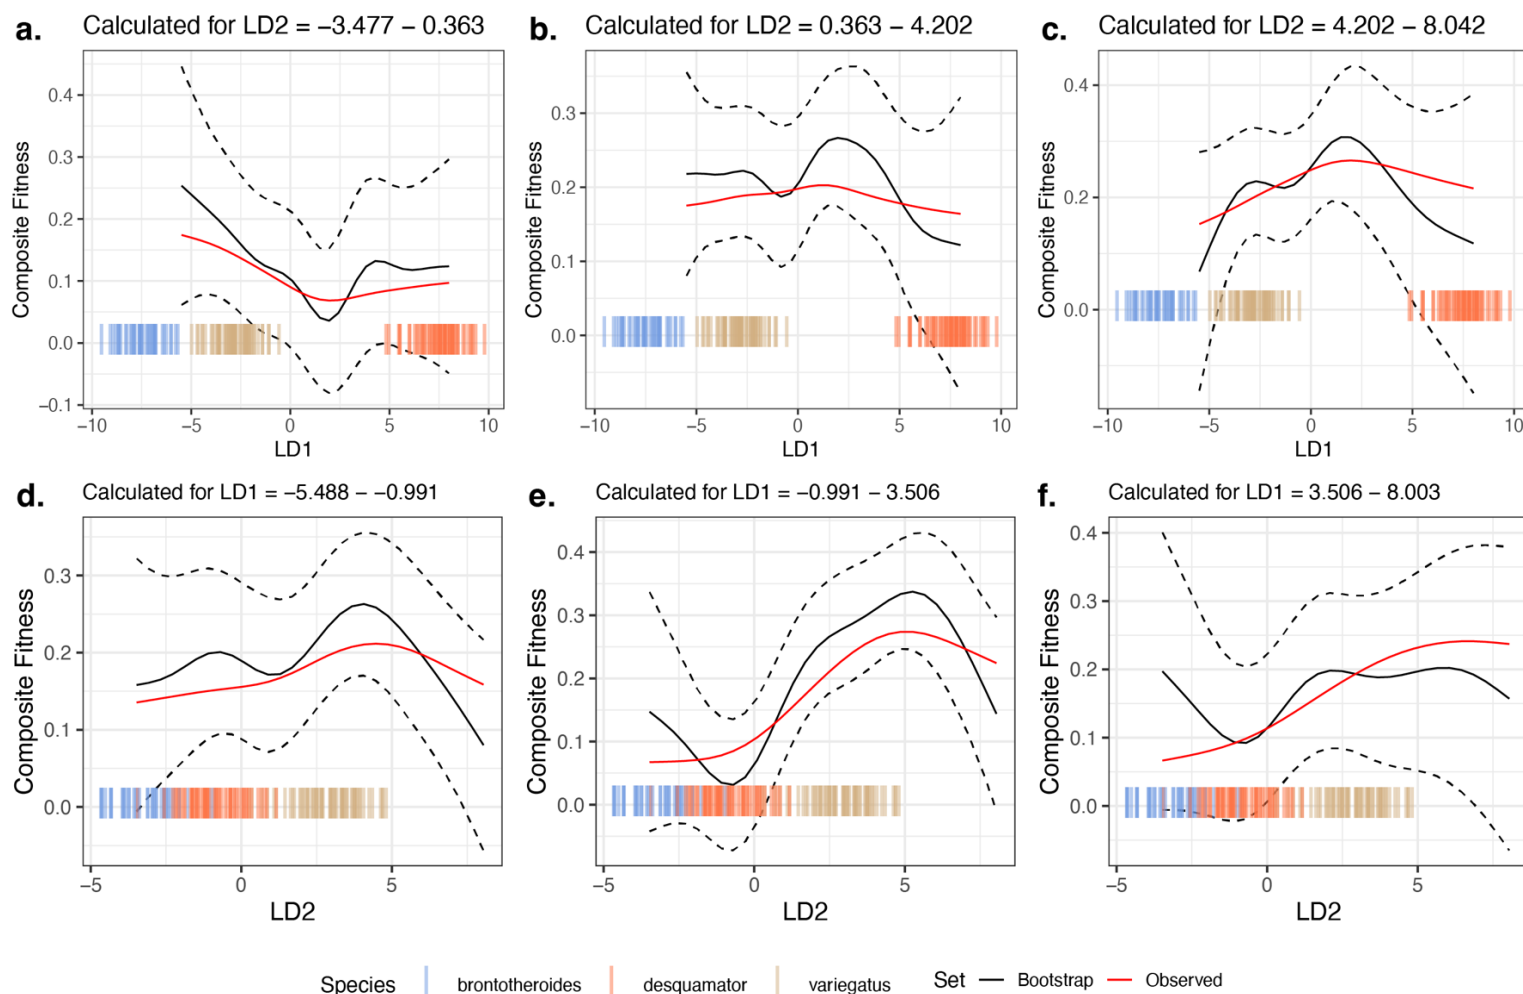

**Figure 2—figure supplement 7. Comparison of 10,000 bootstrapped estimates of predicted mean composite fitness to estimations from observed data across slices of the fitness landscape.** The focal fitness landscape (Figure 3c-d) was estimated using composite fitness, linear discriminant axes obtained from all morphological traits, and the most-strongly fitness associated SNPs. The mean value of predicted fitness across all bootstrap replicates is plotted as a solid black line; the dashed black line indicates  $\pm 1$  standard deviation. The observed predicted fitness is plotted as the solid red line. Observed parental morphological LD scores are plotted as colored vertical hashes: see legend at bottom. Subplots **a.**, **b.**, and **c.**, are estimates along LD1, as calculated from the bottom, middle and top third of LD2 values respectively. Subplots **d.**, **e.**, and **f.**, are estimates along LD2, as calculated from the bottom, middle and top third of LD1 values respectively.



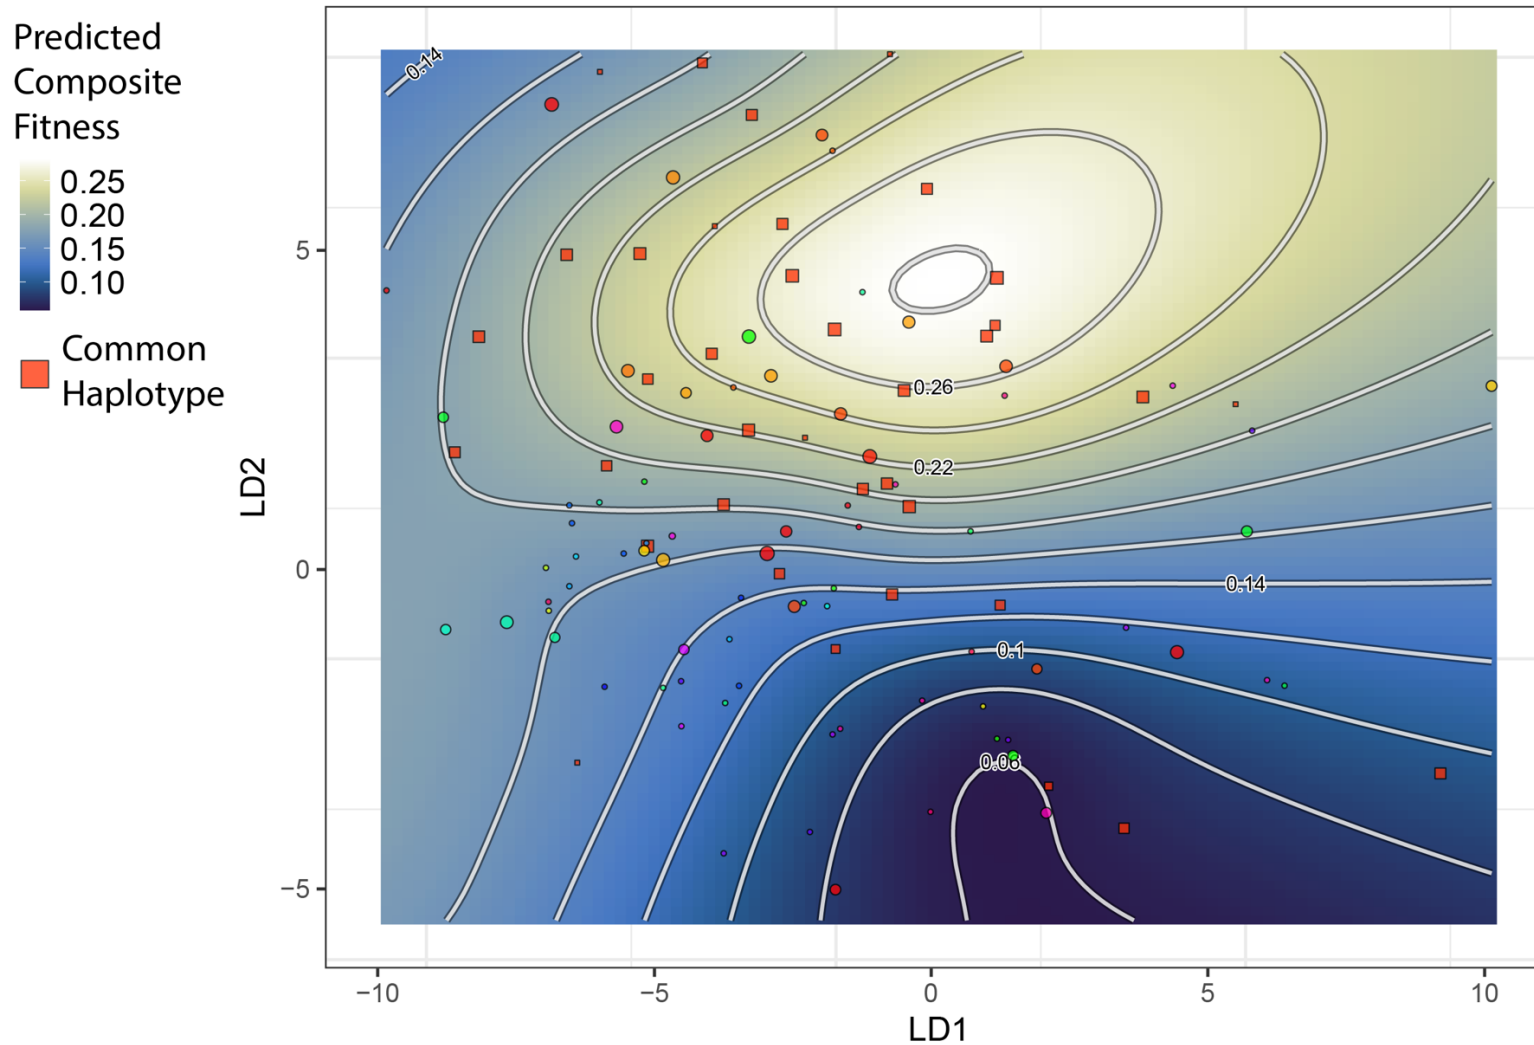

**Figure 2—figure supplement 8. The topography of the composite fitness adaptive landscape is influenced by the distribution of a common SNP haplotype.** Shown is the same landscape as in Figure 2, but the plotted points are unique SNP haplotypes for the thirteen most strongly fitness-associated SNPs. One haplotype is particularly frequent among hybrids; individuals with this haplotype are closer in morphospace to generalists and drive the emergence of a local fitness optimum for generalists. All other haplotypes (points) are plotted with a distinct color per haplotype.

*Hybridization alters the fitness landscape*

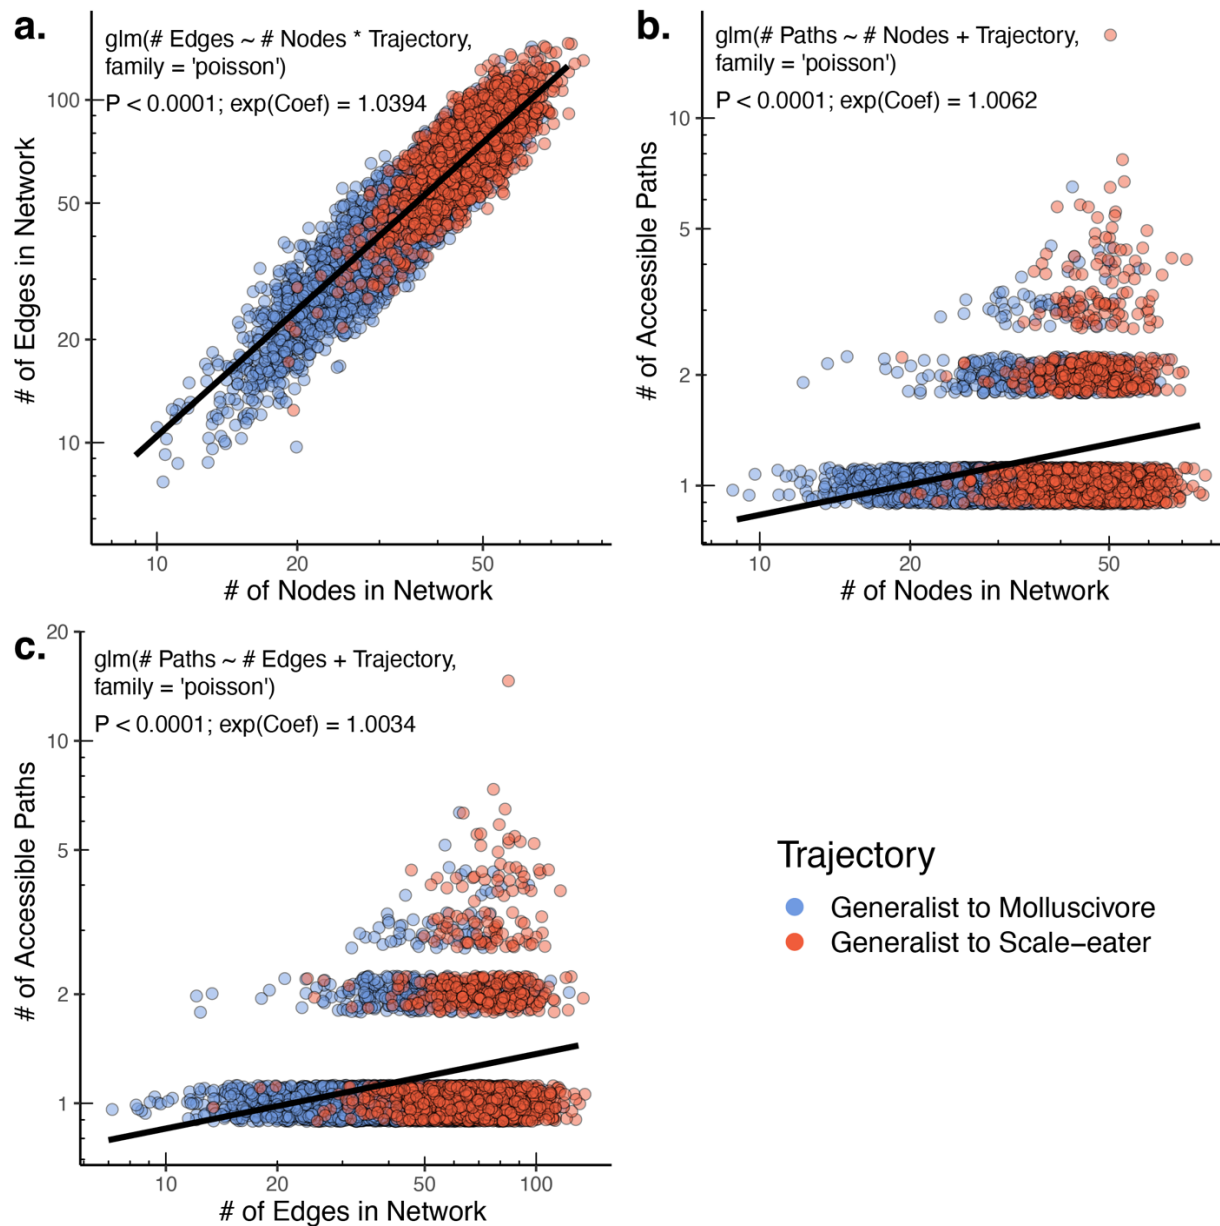

**Figure 4—figure supplement 1. The raw number of accessible paths increases with network size.** The number of edges (and thus number of potential paths) is strongly positively correlated with the observed number of nodes (unique SNP haplotypes) in a network (a.). Correspondingly, both the number of nodes (b.) and number of edges (c.) positively correlate with the number of accessible paths between generalists and specialists in a given network. Only results for composite fitness are plotted; results are consistent across fitness measures. Models correspond to those in Appendix 1—table 13. Poisson regression was chosen as each response variable correspond to count-data. Because Poisson regression models are log-linear, we report the exponentiated coefficient which corresponds to the expected multiplicative increase in the mean of Y per unit-value of X.

Hybridization alters the fitness landscape

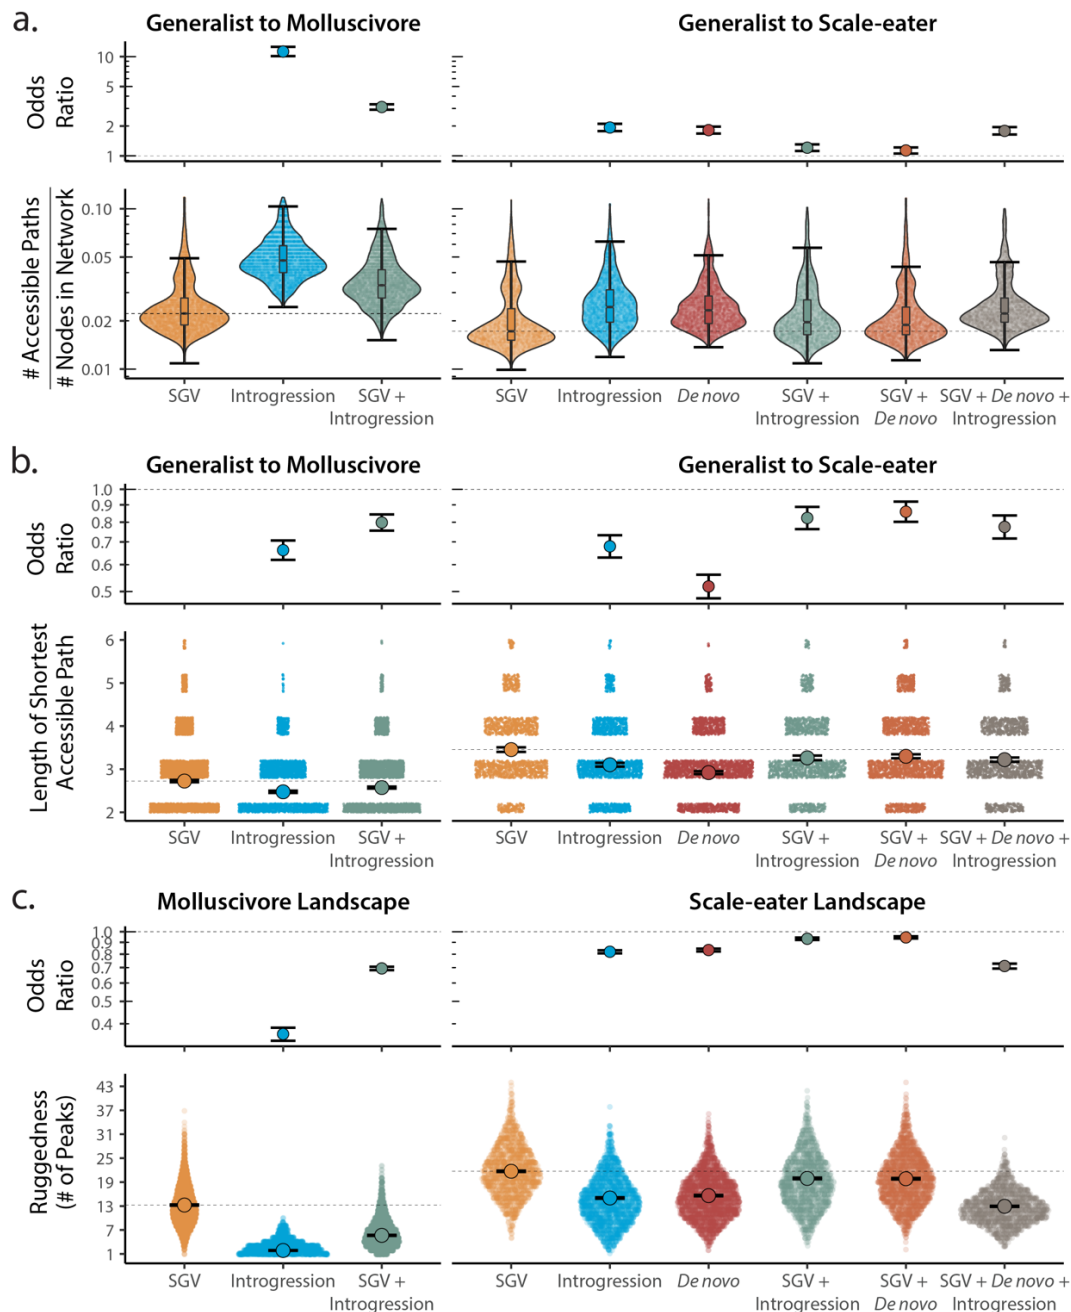

**Figure 5—figure supplement 1. Adaptive loci sourced from introgression and *de novo* mutation reduce fitness landscape ruggedness and increase accessibility as compared to standing genetic variation (SGV) using survival as our proxy for fitness.** Odds ratios (maximum likelihood estimate and 95% CI) indicate the effect of each source of variation on accessibility as compared to networks estimated from standing variation alone. **a.** The number of accessible (i.e. monotonically increasing in fitness) paths per network, scaled by the size of the network (# of nodes in network). Significance was assessed using a likelihood ratio test, corrected for the false discovery rate (reported in Appendix 1—table 13). Dashed lines correspond to the median estimate for standing genetic variation to aid comparison to other sources of adaptive variation. **b.** Number of mutational steps in the shortest accessible path. Means are plotted as large circles, with two standard errors shown; dashed horizontal lines correspond to the mean for standing genetic variation. **c.** Ruggedness of molluscivore and scale-eater fitness landscapes constructed from each source of genetic variation as measured by the number of peaks (genotypes with no fitter neighbors).

Hybridization alters the fitness landscape

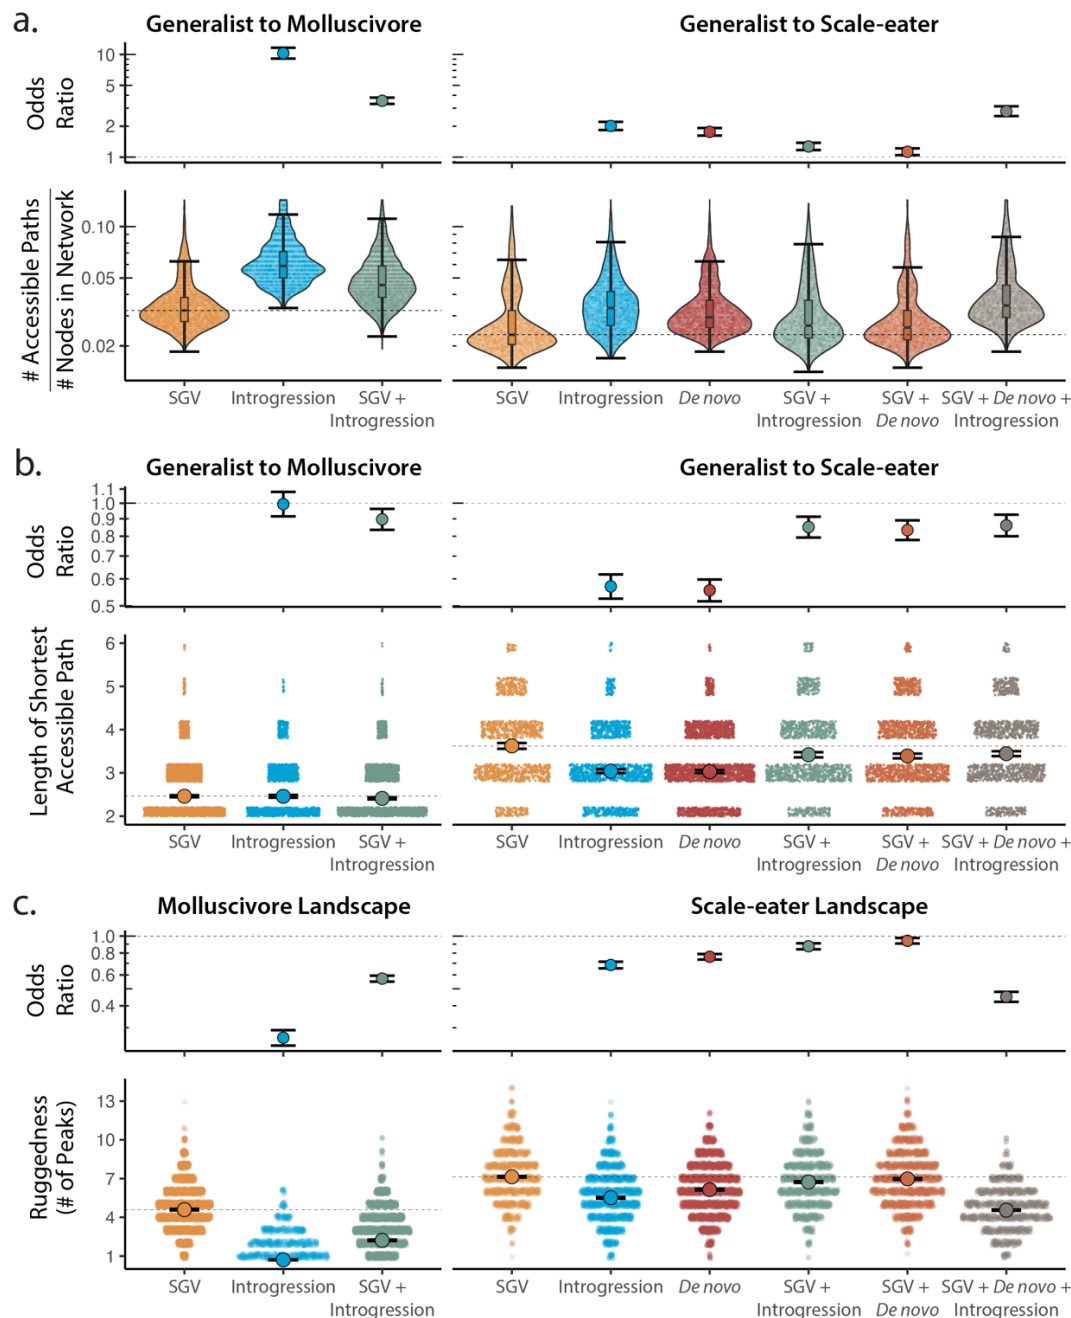

**Figure 5—figure supplement 2. Adaptive loci sourced from introgression and *de novo* mutation reduce fitness landscape ruggedness and increase accessibility as compared to standing genetic variation (SGV) using growth as our proxy for fitness.** Odds ratios (maximum likelihood estimate and 95% CI) indicate the effect of each source of variation on accessibility as compared to networks estimated from standing variation alone. **a.** The number of accessible (i.e. monotonically increasing in fitness) paths per network, scaled by the size of the network (# of nodes in network). Significance was assessed using a likelihood ratio test, corrected for the false discovery rate (reported in Appendix 1—table 13). Dashed lines correspond to the median estimate for standing genetic variation to aid comparison to other sources of adaptive variation. **b.** Number of mutational steps in the shortest accessible path. Means are plotted as large circles, with two standard errors shown; dashed horizontal lines correspond to the mean for standing genetic variation. **c.** Ruggedness of molluscivore and scale-eater fitness landscapes constructed from each source of genetic variation as measured by the number of peaks (genotypes with no fitter neighbors).

**Appendix 1—Table 1. Samples of hybrids and parental studies used either in genomic or morphological analyses, along with associated metadata.**

| ID      | Sequenced  | Morphology | Survivorship | Experiment          | Lake          | Species |
|---------|------------|------------|--------------|---------------------|---------------|---------|
| CP04E02 | This study | Yes        | Non-Survivor | Martin & Gould 2020 | Crescent Pond | Hybrid  |
| CP07F05 | This study | Yes        | Non-Survivor | Martin & Gould 2020 | Crescent Pond | Hybrid  |
| CP08H06 | This study | Yes        | Non-Survivor | Martin & Gould 2020 | Crescent Pond | Hybrid  |
| CP09C02 | This study | Yes        | Non-Survivor | Martin & Gould 2020 | Crescent Pond | Hybrid  |
| CP09D01 | This study | Yes        | Non-Survivor | Martin & Gould 2020 | Crescent Pond | Hybrid  |
| CP09F10 | This study | Yes        | Non-Survivor | Martin & Gould 2020 | Crescent Pond | Hybrid  |
| CP10B05 | This study | Yes        | Non-Survivor | Martin & Gould 2020 | Crescent Pond | Hybrid  |
| CP11C10 | This study | Yes        | Non-Survivor | Martin & Gould 2020 | Crescent Pond | Hybrid  |
| CP13E03 | This study | Yes        | Non-Survivor | Martin & Gould 2020 | Crescent Pond | Hybrid  |
| CP13F01 | This study | Yes        | Non-Survivor | Martin & Gould 2020 | Crescent Pond | Hybrid  |
| LL01F03 | This study | Yes        | Non-Survivor | Martin & Gould 2020 | Little Lake   | Hybrid  |
| LL01F05 | This study | Yes        | Non-Survivor | Martin & Gould 2020 | Little Lake   | Hybrid  |
| LL01G05 | This study | Yes        | Non-Survivor | Martin & Gould 2020 | Little Lake   | Hybrid  |
| LL02A08 | This study | Yes        | Non-Survivor | Martin & Gould 2020 | Little Lake   | Hybrid  |
| LL02D09 | This study | Yes        | Non-Survivor | Martin & Gould 2020 | Little Lake   | Hybrid  |
| LL02D11 | This study | Yes        | Non-Survivor | Martin & Gould 2020 | Little Lake   | Hybrid  |
| LL02E04 | This study | Yes        | Non-Survivor | Martin & Gould 2020 | Little Lake   | Hybrid  |
| LL02E07 | This study | Yes        | Non-Survivor | Martin & Gould 2020 | Little Lake   | Hybrid  |
| LL02E09 | This study | Yes        | Non-Survivor | Martin & Gould 2020 | Little Lake   | Hybrid  |
| LL04E03 | This study | Yes        | Non-Survivor | Martin & Gould 2020 | Little Lake   | Hybrid  |
| LL04E09 | This study | Yes        | Non-Survivor | Martin & Gould 2020 | Little Lake   | Hybrid  |
| LL04F02 | This study | Yes        | Non-Survivor | Martin & Gould 2020 | Little Lake   | Hybrid  |
| LL04F07 | This study | Yes        | Non-Survivor | Martin & Gould 2020 | Little Lake   | Hybrid  |
| LL05A01 | This study | Yes        | Non-Survivor | Martin & Gould 2020 | Little Lake   | Hybrid  |
| LL05C06 | This study | Yes        | Non-Survivor | Martin & Gould 2020 | Little Lake   | Hybrid  |
| LL05C09 | This study | Yes        | Non-Survivor | Martin & Gould 2020 | Little Lake   | Hybrid  |
| LL05C10 | This study | Yes        | Non-Survivor | Martin & Gould 2020 | Little Lake   | Hybrid  |
| LL05D10 | This study | Yes        | Non-Survivor | Martin & Gould 2020 | Little Lake   | Hybrid  |
| LL05E06 | This study | Yes        | Non-Survivor | Martin & Gould 2020 | Little Lake   | Hybrid  |
| LL05E08 | This study | Yes        | Non-Survivor | Martin & Gould 2020 | Little Lake   | Hybrid  |
| LL05H10 | This study | Yes        | Non-Survivor | Martin & Gould 2020 | Little Lake   | Hybrid  |
| LL06A10 | This study | Yes        | Non-Survivor | Martin & Gould 2020 | Little Lake   | Hybrid  |
| LL06B03 | This study | Yes        | Non-Survivor | Martin & Gould 2020 | Little Lake   | Hybrid  |
| LL06C10 | This study | Yes        | Non-Survivor | Martin & Gould 2020 | Little Lake   | Hybrid  |
| LL06D12 | This study | Yes        | Non-Survivor | Martin & Gould 2020 | Little Lake   | Hybrid  |
| LL06E10 | This study | Yes        | Non-Survivor | Martin & Gould 2020 | Little Lake   | Hybrid  |
| LL06F08 | This study | Yes        | Non-Survivor | Martin & Gould 2020 | Little Lake   | Hybrid  |
| LL08B09 | This study | Yes        | Non-Survivor | Martin & Gould 2020 | Little Lake   | Hybrid  |
| LL08B11 | This study | Yes        | Non-Survivor | Martin & Gould 2020 | Little Lake   | Hybrid  |
| LL08G07 | This study | Yes        | Non-Survivor | Martin & Gould 2020 | Little Lake   | Hybrid  |
| LL08G10 | This study | Yes        | Non-Survivor | Martin & Gould 2020 | Little Lake   | Hybrid  |
| LL08H01 | This study | Yes        | Non-Survivor | Martin & Gould 2020 | Little Lake   | Hybrid  |
| LL09A09 | This study | Yes        | Non-Survivor | Martin & Gould 2020 | Little Lake   | Hybrid  |
| LL09A10 | This study | Yes        | Non-Survivor | Martin & Gould 2020 | Little Lake   | Hybrid  |
| LL09B05 | This study | Yes        | Non-Survivor | Martin & Gould 2020 | Little Lake   | Hybrid  |
| LL09C03 | This study | Yes        | Non-Survivor | Martin & Gould 2020 | Little Lake   | Hybrid  |
| LL09D01 | This study | Yes        | Non-Survivor | Martin & Gould 2020 | Little Lake   | Hybrid  |
| LL09D10 | This study | Yes        | Non-Survivor | Martin & Gould 2020 | Little Lake   | Hybrid  |
| LL09E01 | This study | Yes        | Non-Survivor | Martin & Gould 2020 | Little Lake   | Hybrid  |
| LL09F03 | This study | Yes        | Non-Survivor | Martin & Gould 2020 | Little Lake   | Hybrid  |
| LL09H07 | This study | Yes        | Non-Survivor | Martin & Gould 2020 | Little Lake   | Hybrid  |
| LL09H10 | This study | Yes        | Non-Survivor | Martin & Gould 2020 | Little Lake   | Hybrid  |

*Hybridization alters the fitness landscape*

|         |            |     |          |                          |               |        |
|---------|------------|-----|----------|--------------------------|---------------|--------|
| CP06G01 | This study | Yes | Survivor | Martin & Gould 2020      | Crescent Pond | Hybrid |
| CP06H09 | This study | Yes | Survivor | Martin & Gould 2020      | Crescent Pond | Hybrid |
| CP07E08 | This study | Yes | Survivor | Martin & Gould 2020      | Crescent Pond | Hybrid |
| CP07H01 | This study | Yes | Survivor | Martin & Gould 2020      | Crescent Pond | Hybrid |
| CP07H11 | This study | Yes | Survivor | Martin & Gould 2020      | Crescent Pond | Hybrid |
| CP08F07 | This study | Yes | Survivor | Martin & Gould 2020      | Crescent Pond | Hybrid |
| CP08G08 | This study | Yes | Survivor | Martin & Gould 2020      | Crescent Pond | Hybrid |
| CP09D02 | This study | Yes | Survivor | Martin & Gould 2020      | Crescent Pond | Hybrid |
| CP10A03 | This study | Yes | Survivor | Martin & Gould 2020      | Crescent Pond | Hybrid |
| CP10C04 | This study | Yes | Survivor | Martin & Gould 2020      | Crescent Pond | Hybrid |
| CP10C07 | This study | Yes | Survivor | Martin & Gould 2020      | Crescent Pond | Hybrid |
| CP10C12 | This study | Yes | Survivor | Martin & Gould 2020      | Crescent Pond | Hybrid |
| CP10F12 | This study | Yes | Survivor | Martin & Gould 2020      | Crescent Pond | Hybrid |
| CP10H01 | This study | Yes | Survivor | Martin & Gould 2020      | Crescent Pond | Hybrid |
| CP11B03 | This study | Yes | Survivor | Martin & Gould 2020      | Crescent Pond | Hybrid |
| CP11C08 | This study | Yes | Survivor | Martin & Gould 2020      | Crescent Pond | Hybrid |
| CP11D04 | This study | Yes | Survivor | Martin & Gould 2020      | Crescent Pond | Hybrid |
| CP11G06 | This study | Yes | Survivor | Martin & Gould 2020      | Crescent Pond | Hybrid |
| CP11G12 | This study | Yes | Survivor | Martin & Gould 2020      | Crescent Pond | Hybrid |
| CP12E05 | This study | Yes | Survivor | Martin & Gould 2020      | Crescent Pond | Hybrid |
| CP12E07 | This study | Yes | Survivor | Martin & Gould 2020      | Crescent Pond | Hybrid |
| CP12H04 | This study | Yes | Survivor | Martin & Gould 2020      | Crescent Pond | Hybrid |
| CP13B02 | This study | Yes | Survivor | Martin & Gould 2020      | Crescent Pond | Hybrid |
| CP13B08 | This study | Yes | Survivor | Martin & Gould 2020      | Crescent Pond | Hybrid |
| CP14C04 | This study | Yes | Survivor | Martin & Gould 2020      | Crescent Pond | Hybrid |
| CP15A10 | This study | Yes | Survivor | Martin & Gould 2020      | Crescent Pond | Hybrid |
| CP15B08 | This study | Yes | Survivor | Martin & Gould 2020      | Crescent Pond | Hybrid |
| CP15E01 | This study | Yes | Survivor | Martin & Gould 2020      | Crescent Pond | Hybrid |
| CP15E03 | This study | Yes | Survivor | Martin & Gould 2020      | Crescent Pond | Hybrid |
| CP17A01 | This study | Yes | Survivor | Martin & Gould 2020      | Crescent Pond | Hybrid |
| CP18B11 | This study | Yes | Survivor | Martin & Gould 2020      | Crescent Pond | Hybrid |
| CP19B02 | This study | Yes | Survivor | Martin & Gould 2020      | Crescent Pond | Hybrid |
| CP19C02 | This study | Yes | Survivor | Martin & Gould 2020      | Crescent Pond | Hybrid |
| CP19C07 | This study | Yes | Survivor | Martin & Gould 2020      | Crescent Pond | Hybrid |
| CP19F01 | This study | Yes | Survivor | Martin & Gould 2020      | Crescent Pond | Hybrid |
| CP19G03 | This study | Yes | Survivor | Martin & Gould 2020      | Crescent Pond | Hybrid |
| CPH01   | This study | Yes | Survivor | Martin & Wainwright 2013 | Crescent Pond | Hybrid |
| CPH02   | This study | Yes | Survivor | Martin & Wainwright 2013 | Crescent Pond | Hybrid |
| CPH03   | This study | Yes | Survivor | Martin & Wainwright 2013 | Crescent Pond | Hybrid |
| CPH04   | This study | Yes | Survivor | Martin & Wainwright 2013 | Crescent Pond | Hybrid |
| CPH05   | This study | Yes | Survivor | Martin & Wainwright 2013 | Crescent Pond | Hybrid |
| CPH07   | This study | Yes | Survivor | Martin & Wainwright 2013 | Crescent Pond | Hybrid |
| CPH08   | This study | Yes | Survivor | Martin & Wainwright 2013 | Crescent Pond | Hybrid |
| CPH09   | This study | Yes | Survivor | Martin & Wainwright 2013 | Crescent Pond | Hybrid |
| CPH10   | This study | Yes | Survivor | Martin & Wainwright 2013 | Crescent Pond | Hybrid |
| CPH100  | This study | Yes | Survivor | Martin & Wainwright 2013 | Crescent Pond | Hybrid |
| CPH11   | This study | Yes | Survivor | Martin & Wainwright 2013 | Crescent Pond | Hybrid |
| CPH123  | This study | Yes | Survivor | Martin & Wainwright 2013 | Crescent Pond | Hybrid |
| LL01H04 | This study | Yes | Survivor | Martin & Gould 2020      | Little Lake   | Hybrid |
| LL02G09 | This study | Yes | Survivor | Martin & Gould 2020      | Little Lake   | Hybrid |
| LL06B06 | This study | Yes | Survivor | Martin & Gould 2020      | Little Lake   | Hybrid |
| LL06E04 | This study | Yes | Survivor | Martin & Gould 2020      | Little Lake   | Hybrid |
| LL07E12 | This study | Yes | Survivor | Martin & Gould 2020      | Little Lake   | Hybrid |
| LL07G04 | This study | Yes | Survivor | Martin & Gould 2020      | Little Lake   | Hybrid |
| LL08A09 | This study | Yes | Survivor | Martin & Gould 2020      | Little Lake   | Hybrid |
| LL08B04 | This study | Yes | Survivor | Martin & Gould 2020      | Little Lake   | Hybrid |

*Hybridization alters the fitness landscape*

|          |                      |     |          |                          |                           |              |
|----------|----------------------|-----|----------|--------------------------|---------------------------|--------------|
| LL175    | This study           | Yes | Survivor | Martin & Wainwright 2013 | Little Lake               | Hybrid       |
| LL23     | This study           | Yes | Survivor | Martin & Wainwright 2013 | Little Lake               | Hybrid       |
| LL247    | This study           | Yes | Survivor | Martin & Wainwright 2013 | Little Lake               | Hybrid       |
| LL251    | This study           | Yes | Survivor | Martin & Wainwright 2013 | Little Lake               | Hybrid       |
| LL271    | This study           | Yes | Survivor | Martin & Wainwright 2013 | Little Lake               | Hybrid       |
| LLH12    | This study           | Yes | Survivor | Martin & Wainwright 2013 | Little Lake               | Hybrid       |
| LLH34    | This study           | Yes | Survivor | Martin & Wainwright 2013 | Little Lake               | Hybrid       |
| LLH41    | This study           | Yes | Survivor | Martin & Wainwright 2013 | Little Lake               | Hybrid       |
| LLH51    | This study           | Yes | Survivor | Martin & Wainwright 2013 | Little Lake               | Hybrid       |
| LLH94    | This study           | Yes | Survivor | Martin & Wainwright 2013 | Little Lake               | Hybrid       |
| CRPA1    | Richards et al. 2021 | No  | NA       | NA                       | Crescent Pond             | Generalist   |
| CRPA1000 | Richards et al. 2021 | No  | NA       | NA                       | Crescent Pond             | Generalist   |
| CRPA1001 | Richards et al. 2021 | No  | NA       | NA                       | Crescent Pond             | Generalist   |
| CRPA1003 | Richards et al. 2021 | No  | NA       | NA                       | Crescent Pond             | Generalist   |
| CRPA3    | Richards et al. 2021 | No  | NA       | NA                       | Crescent Pond             | Generalist   |
| LILA1    | Richards et al. 2021 | No  | NA       | NA                       | Little Lake               | Generalist   |
| OSPA1    | Richards et al. 2021 | No  | NA       | NA                       | Osprey Pond (Little Lake) | Generalist   |
| OSPA1000 | Richards et al. 2021 | No  | NA       | NA                       | Osprey Pond (Little Lake) | Generalist   |
| OSPA1001 | Richards et al. 2021 | No  | NA       | NA                       | Osprey Pond (Little Lake) | Generalist   |
| OSPA11   | Richards et al. 2021 | No  | NA       | NA                       | Osprey Pond (Little Lake) | Generalist   |
| OSPA12   | Richards et al. 2021 | No  | NA       | NA                       | Osprey Pond (Little Lake) | Generalist   |
| OSPA13   | Richards et al. 2021 | No  | NA       | NA                       | Osprey Pond (Little Lake) | Generalist   |
| OSPA4    | Richards et al. 2021 | No  | NA       | NA                       | Osprey Pond (Little Lake) | Generalist   |
| OSPA5    | Richards et al. 2021 | No  | NA       | NA                       | Osprey Pond (Little Lake) | Generalist   |
| OSPA6    | Richards et al. 2021 | No  | NA       | NA                       | Osprey Pond (Little Lake) | Generalist   |
| OSPA8    | Richards et al. 2021 | No  | NA       | NA                       | Osprey Pond (Little Lake) | Generalist   |
| OSPA9    | Richards et al. 2021 | No  | NA       | NA                       | Osprey Pond (Little Lake) | Generalist   |
| CRPM1    | Richards et al. 2021 | No  | NA       | NA                       | Crescent Pond             | Molluscivore |
| CRPM10   | Richards et al. 2021 | No  | NA       | NA                       | Crescent Pond             | Molluscivore |
| CRPM1000 | Richards et al. 2021 | No  | NA       | NA                       | Crescent Pond             | Molluscivore |
| CRPM1001 | Richards et al. 2021 | No  | NA       | NA                       | Crescent Pond             | Molluscivore |
| CRPM11   | Richards et al. 2021 | No  | NA       | NA                       | Crescent Pond             | Molluscivore |
| CRPM2    | Richards et al. 2021 | No  | NA       | NA                       | Crescent Pond             | Molluscivore |
| CRPM3    | Richards et al. 2021 | No  | NA       | NA                       | Crescent Pond             | Molluscivore |
| CRPM5    | Richards et al. 2021 | No  | NA       | NA                       | Crescent Pond             | Molluscivore |
| CRPM6    | Richards et al. 2021 | No  | NA       | NA                       | Crescent Pond             | Molluscivore |
| CRPM7    | Richards et al. 2021 | No  | NA       | NA                       | Crescent Pond             | Molluscivore |
| CRPM8    | Richards et al. 2021 | No  | NA       | NA                       | Crescent Pond             | Molluscivore |
| CRPM9    | Richards et al. 2021 | No  | NA       | NA                       | Crescent Pond             | Molluscivore |
| LILM-QTL | Richards et al. 2021 | No  | NA       | NA                       | Little Lake               | Molluscivore |
| LILM3    | Richards et al. 2021 | No  | NA       | NA                       | Little Lake               | Molluscivore |
| LILM4    | Richards et al. 2021 | No  | NA       | NA                       | Little Lake               | Molluscivore |
| LILM5    | Richards et al. 2021 | No  | NA       | NA                       | Little Lake               | Molluscivore |
| OSPM1    | Richards et al. 2021 | No  | NA       | NA                       | Osprey Pond (Little Lake) | Molluscivore |
| OSPM1000 | Richards et al. 2021 | No  | NA       | NA                       | Osprey Pond (Little Lake) | Molluscivore |
| OSPM1001 | Richards et al. 2021 | No  | NA       | NA                       | Osprey Pond (Little Lake) | Molluscivore |
| OSPM11   | Richards et al. 2021 | No  | NA       | NA                       | Osprey Pond (Little Lake) | Molluscivore |
| OSPM2    | Richards et al. 2021 | No  | NA       | NA                       | Osprey Pond (Little Lake) | Molluscivore |
| OSPM3    | Richards et al. 2021 | No  | NA       | NA                       | Osprey Pond (Little Lake) | Molluscivore |
| OSPM4    | Richards et al. 2021 | No  | NA       | NA                       | Osprey Pond (Little Lake) | Molluscivore |
| OSPM5    | Richards et al. 2021 | No  | NA       | NA                       | Osprey Pond (Little Lake) | Molluscivore |
| OSPM7    | Richards et al. 2021 | No  | NA       | NA                       | Osprey Pond (Little Lake) | Molluscivore |
| OSPM8    | Richards et al. 2021 | No  | NA       | NA                       | Osprey Pond (Little Lake) | Molluscivore |
| OSPM9    | Richards et al. 2021 | No  | NA       | NA                       | Osprey Pond (Little Lake) | Molluscivore |
| CRPP-QTL | Richards et al. 2021 | No  | NA       | NA                       | Crescent Pond             | Scale-eater  |
| CRPP1000 | Richards et al. 2021 | No  | NA       | NA                       | Crescent Pond             | Scale-eater  |

*Hybridization alters the fitness landscape*

|          |                      |     |          |    |                           |             |
|----------|----------------------|-----|----------|----|---------------------------|-------------|
| LILP4    | Richards et al. 2021 | No  | NA       | NA | Little Lake               | Scale-eater |
| LILP5    | Richards et al. 2021 | No  | NA       | NA | Little Lake               | Scale-eater |
| OSPP1    | Richards et al. 2021 | No  | NA       | NA | Osprey Pond (Little Lake) | Scale-eater |
| OSPP10   | Richards et al. 2021 | No  | NA       | NA | Osprey Pond (Little Lake) | Scale-eater |
| OSPP1000 | Richards et al. 2021 | No  | NA       | NA | Osprey Pond (Little Lake) | Scale-eater |
| OSPP1001 | Richards et al. 2021 | No  | NA       | NA | Osprey Pond (Little Lake) | Scale-eater |
| OSPP11   | Richards et al. 2021 | No  | NA       | NA | Osprey Pond (Little Lake) | Scale-eater |
| OSPP2    | Richards et al. 2021 | No  | NA       | NA | Osprey Pond (Little Lake) | Scale-eater |
| OSPP3    | Richards et al. 2021 | No  | NA       | NA | Osprey Pond (Little Lake) | Scale-eater |
| OSPP4    | Richards et al. 2021 | No  | NA       | NA | Osprey Pond (Little Lake) | Scale-eater |
| OSPP5    | Richards et al. 2021 | No  | NA       | NA | Osprey Pond (Little Lake) | Scale-eater |
| OSPP7    | Richards et al. 2021 | No  | NA       | NA | Osprey Pond (Little Lake) | Scale-eater |
| OSPP9    | Richards et al. 2021 | No  | NA       | NA | Osprey Pond (Little Lake) | Scale-eater |
| CPA01    | NA                   | Yes | Parental | NA | Crescent Pond             | Generalist  |
| CPA03    | NA                   | Yes | Parental | NA | Crescent Pond             | Generalist  |
| CPA05    | NA                   | Yes | Parental | NA | Crescent Pond             | Generalist  |
| CPA07    | NA                   | Yes | Parental | NA | Crescent Pond             | Generalist  |
| CPA09    | NA                   | Yes | Parental | NA | Crescent Pond             | Generalist  |
| CPA11    | NA                   | Yes | Parental | NA | Crescent Pond             | Generalist  |
| CPA13    | NA                   | Yes | Parental | NA | Crescent Pond             | Generalist  |
| CPA15    | NA                   | Yes | Parental | NA | Crescent Pond             | Generalist  |
| CPA17    | NA                   | Yes | Parental | NA | Crescent Pond             | Generalist  |
| CPA19    | NA                   | Yes | Parental | NA | Crescent Pond             | Generalist  |
| CPA21    | NA                   | Yes | Parental | NA | Crescent Pond             | Generalist  |
| CPA23    | NA                   | Yes | Parental | NA | Crescent Pond             | Generalist  |
| CPA25    | NA                   | Yes | Parental | NA | Crescent Pond             | Generalist  |
| CPA27    | NA                   | Yes | Parental | NA | Crescent Pond             | Generalist  |
| CPA29    | NA                   | Yes | Parental | NA | Crescent Pond             | Generalist  |
| CPA31    | NA                   | Yes | Parental | NA | Crescent Pond             | Generalist  |
| CPA33    | NA                   | Yes | Parental | NA | Crescent Pond             | Generalist  |
| CPA35    | NA                   | Yes | Parental | NA | Crescent Pond             | Generalist  |
| CPA37    | NA                   | Yes | Parental | NA | Crescent Pond             | Generalist  |
| CPA39    | NA                   | Yes | Parental | NA | Crescent Pond             | Generalist  |
| CPA41    | NA                   | Yes | Parental | NA | Crescent Pond             | Generalist  |
| CPA43    | NA                   | Yes | Parental | NA | Crescent Pond             | Generalist  |
| CPA45    | NA                   | Yes | Parental | NA | Crescent Pond             | Generalist  |
| CPA47    | NA                   | Yes | Parental | NA | Crescent Pond             | Generalist  |
| CPA49    | NA                   | Yes | Parental | NA | Crescent Pond             | Generalist  |
| CPA51    | NA                   | Yes | Parental | NA | Crescent Pond             | Generalist  |
| CPA53    | NA                   | Yes | Parental | NA | Crescent Pond             | Generalist  |
| CPA55    | NA                   | Yes | Parental | NA | Crescent Pond             | Generalist  |
| CPA57    | NA                   | Yes | Parental | NA | Crescent Pond             | Generalist  |
| CPA59    | NA                   | Yes | Parental | NA | Crescent Pond             | Generalist  |
| LLA20    | NA                   | Yes | Parental | NA | Little Lake               | Generalist  |
| LLA21    | NA                   | Yes | Parental | NA | Little Lake               | Generalist  |
| LLA22    | NA                   | Yes | Parental | NA | Little Lake               | Generalist  |
| LLA23    | NA                   | Yes | Parental | NA | Little Lake               | Generalist  |
| LLA24    | NA                   | Yes | Parental | NA | Little Lake               | Generalist  |
| LLA25    | NA                   | Yes | Parental | NA | Little Lake               | Generalist  |
| LLA26    | NA                   | Yes | Parental | NA | Little Lake               | Generalist  |
| LLA27    | NA                   | Yes | Parental | NA | Little Lake               | Generalist  |
| LLA28    | NA                   | Yes | Parental | NA | Little Lake               | Generalist  |
| LLA29    | NA                   | Yes | Parental | NA | Little Lake               | Generalist  |
| LLA30    | NA                   | Yes | Parental | NA | Little Lake               | Generalist  |
| LLA31    | NA                   | Yes | Parental | NA | Little Lake               | Generalist  |
| LLA32    | NA                   | Yes | Parental | NA | Little Lake               | Generalist  |



*Hybridization alters the fitness landscape*

|       |    |     |          |    |               |              |
|-------|----|-----|----------|----|---------------|--------------|
| LLA43 | NA | Yes | Parental | NA | Little Lake   | Generalist   |
| LLA44 | NA | Yes | Parental | NA | Little Lake   | Generalist   |
| LLA45 | NA | Yes | Parental | NA | Little Lake   | Generalist   |
| LLA46 | NA | Yes | Parental | NA | Little Lake   | Generalist   |
| LLA47 | NA | Yes | Parental | NA | Little Lake   | Generalist   |
| LLA48 | NA | Yes | Parental | NA | Little Lake   | Generalist   |
| LLA49 | NA | Yes | Parental | NA | Little Lake   | Generalist   |
| CPM01 | NA | Yes | Parental | NA | Crescent Pond | Molluscivore |
| CPM02 | NA | Yes | Parental | NA | Crescent Pond | Molluscivore |
| CPM03 | NA | Yes | Parental | NA | Crescent Pond | Molluscivore |
| CPM04 | NA | Yes | Parental | NA | Crescent Pond | Molluscivore |
| CPM05 | NA | Yes | Parental | NA | Crescent Pond | Molluscivore |
| CPM06 | NA | Yes | Parental | NA | Crescent Pond | Molluscivore |
| CPM07 | NA | Yes | Parental | NA | Crescent Pond | Molluscivore |
| CPM08 | NA | Yes | Parental | NA | Crescent Pond | Molluscivore |
| CPM09 | NA | Yes | Parental | NA | Crescent Pond | Molluscivore |
| CPM10 | NA | Yes | Parental | NA | Crescent Pond | Molluscivore |
| CPM11 | NA | Yes | Parental | NA | Crescent Pond | Molluscivore |
| CPM12 | NA | Yes | Parental | NA | Crescent Pond | Molluscivore |
| CPM13 | NA | Yes | Parental | NA | Crescent Pond | Molluscivore |
| CPM14 | NA | Yes | Parental | NA | Crescent Pond | Molluscivore |
| CPM15 | NA | Yes | Parental | NA | Crescent Pond | Molluscivore |
| CPM16 | NA | Yes | Parental | NA | Crescent Pond | Molluscivore |
| CPM17 | NA | Yes | Parental | NA | Crescent Pond | Molluscivore |
| CPM18 | NA | Yes | Parental | NA | Crescent Pond | Molluscivore |
| CPM19 | NA | Yes | Parental | NA | Crescent Pond | Molluscivore |
| CPM20 | NA | Yes | Parental | NA | Crescent Pond | Molluscivore |
| LLM01 | NA | Yes | Parental | NA | Little Lake   | Molluscivore |
| LLM02 | NA | Yes | Parental | NA | Little Lake   | Molluscivore |
| LLM03 | NA | Yes | Parental | NA | Little Lake   | Molluscivore |
| LLM04 | NA | Yes | Parental | NA | Little Lake   | Molluscivore |
| LLM05 | NA | Yes | Parental | NA | Little Lake   | Molluscivore |
| LLM06 | NA | Yes | Parental | NA | Little Lake   | Molluscivore |
| LLM07 | NA | Yes | Parental | NA | Little Lake   | Molluscivore |
| LLM08 | NA | Yes | Parental | NA | Little Lake   | Molluscivore |
| LLM09 | NA | Yes | Parental | NA | Little Lake   | Molluscivore |
| LLM10 | NA | Yes | Parental | NA | Little Lake   | Molluscivore |
| LLM11 | NA | Yes | Parental | NA | Little Lake   | Molluscivore |
| LLM12 | NA | Yes | Parental | NA | Little Lake   | Molluscivore |
| LLM13 | NA | Yes | Parental | NA | Little Lake   | Molluscivore |
| LLM14 | NA | Yes | Parental | NA | Little Lake   | Molluscivore |
| LLM15 | NA | Yes | Parental | NA | Little Lake   | Molluscivore |
| LLM16 | NA | Yes | Parental | NA | Little Lake   | Molluscivore |
| LLM17 | NA | Yes | Parental | NA | Little Lake   | Molluscivore |
| LLM18 | NA | Yes | Parental | NA | Little Lake   | Molluscivore |
| CPP01 | NA | Yes | Parental | NA | Crescent Pond | Scale-eater  |
| CPP02 | NA | Yes | Parental | NA | Crescent Pond | Scale-eater  |
| CPP03 | NA | Yes | Parental | NA | Crescent Pond | Scale-eater  |
| CPP04 | NA | Yes | Parental | NA | Crescent Pond | Scale-eater  |
| CPP05 | NA | Yes | Parental | NA | Crescent Pond | Scale-eater  |
| CPP06 | NA | Yes | Parental | NA | Crescent Pond | Scale-eater  |
| CPP07 | NA | Yes | Parental | NA | Crescent Pond | Scale-eater  |
| CPP08 | NA | Yes | Parental | NA | Crescent Pond | Scale-eater  |
| CPP09 | NA | Yes | Parental | NA | Crescent Pond | Scale-eater  |
| CPP10 | NA | Yes | Parental | NA | Crescent Pond | Scale-eater  |
| CPP11 | NA | Yes | Parental | NA | Crescent Pond | Scale-eater  |

*Hybridization alters the fitness landscape*

|       |    |     |          |    |               |             |
|-------|----|-----|----------|----|---------------|-------------|
| CPP22 | NA | Yes | Parental | NA | Crescent Pond | Scale-eater |
| CPP23 | NA | Yes | Parental | NA | Crescent Pond | Scale-eater |
| CPP24 | NA | Yes | Parental | NA | Crescent Pond | Scale-eater |
| CPP25 | NA | Yes | Parental | NA | Crescent Pond | Scale-eater |
| CPP26 | NA | Yes | Parental | NA | Crescent Pond | Scale-eater |
| CPP27 | NA | Yes | Parental | NA | Crescent Pond | Scale-eater |
| CPP28 | NA | Yes | Parental | NA | Crescent Pond | Scale-eater |
| CPP29 | NA | Yes | Parental | NA | Crescent Pond | Scale-eater |
| CPP30 | NA | Yes | Parental | NA | Crescent Pond | Scale-eater |
| LLP01 | NA | Yes | Parental | NA | Little Lake   | Scale-eater |
| LLP02 | NA | Yes | Parental | NA | Little Lake   | Scale-eater |
| LLP03 | NA | Yes | Parental | NA | Little Lake   | Scale-eater |
| LLP04 | NA | Yes | Parental | NA | Little Lake   | Scale-eater |
| LLP05 | NA | Yes | Parental | NA | Little Lake   | Scale-eater |
| LLP06 | NA | Yes | Parental | NA | Little Lake   | Scale-eater |
| LLP07 | NA | Yes | Parental | NA | Little Lake   | Scale-eater |
| LLP08 | NA | Yes | Parental | NA | Little Lake   | Scale-eater |
| LLP09 | NA | Yes | Parental | NA | Little Lake   | Scale-eater |
| LLP10 | NA | Yes | Parental | NA | Little Lake   | Scale-eater |
| LLP11 | NA | Yes | Parental | NA | Little Lake   | Scale-eater |
| LLP12 | NA | Yes | Parental | NA | Little Lake   | Scale-eater |
| LLP13 | NA | Yes | Parental | NA | Little Lake   | Scale-eater |
| LLP14 | NA | Yes | Parental | NA | Little Lake   | Scale-eater |
| LLP15 | NA | Yes | Parental | NA | Little Lake   | Scale-eater |
| LLP16 | NA | Yes | Parental | NA | Little Lake   | Scale-eater |
| LLP17 | NA | Yes | Parental | NA | Little Lake   | Scale-eater |
| LLP18 | NA | Yes | Parental | NA | Little Lake   | Scale-eater |
| LLP19 | NA | Yes | Parental | NA | Little Lake   | Scale-eater |
| LLP20 | NA | Yes | Parental | NA | Little Lake   | Scale-eater |
| LLP21 | NA | Yes | Parental | NA | Little Lake   | Scale-eater |
| LLP22 | NA | Yes | Parental | NA | Little Lake   | Scale-eater |
| LLP23 | NA | Yes | Parental | NA | Little Lake   | Scale-eater |
| LLP24 | NA | Yes | Parental | NA | Little Lake   | Scale-eater |
| LLP25 | NA | Yes | Parental | NA | Little Lake   | Scale-eater |
| LLP26 | NA | Yes | Parental | NA | Little Lake   | Scale-eater |
| LLP27 | NA | Yes | Parental | NA | Little Lake   | Scale-eater |
| LLP28 | NA | Yes | Parental | NA | Little Lake   | Scale-eater |
| LLP29 | NA | Yes | Parental | NA | Little Lake   | Scale-eater |
| LLP30 | NA | Yes | Parental | NA | Little Lake   | Scale-eater |

---

**Appendix 1—Table 2. Models tested to assess the extent to which specialist ancestry predicts measures of fitness and their respective fits using all samples and an unsupervised admixture analysis. Best-fit models are bolded.**

| Fitness Measure                                  | Model Family                                       | Species                                             | Model                                               | AIC                                  | Ancestry Coefficient                                | Ancestry P-value |              |               |
|--------------------------------------------------|----------------------------------------------------|-----------------------------------------------------|-----------------------------------------------------|--------------------------------------|-----------------------------------------------------|------------------|--------------|---------------|
| Composite                                        | Generalist                                         |                                                     | Composite ~ AncestryProp                            | 202.40                               | 0.02                                                | 0.8525           |              |               |
|                                                  |                                                    |                                                     | <b>Composite ~ AncestryProp + Lake</b>              | <b>196.02</b>                        | <b>-0.11</b>                                        | <b>0.3847</b>    |              |               |
|                                                  |                                                    |                                                     | Composite ~ AncestryProp + Experiment               | 203.38                               | 0.08                                                | 0.5223           |              |               |
|                                                  |                                                    |                                                     | Composite ~ AncestryProp + Lake + Experiment        | 197.56                               | -0.06                                               | 0.6610           |              |               |
|                                                  |                                                    |                                                     | <b>Composite ~ AncestryProp + Lake * Experiment</b> | <b>197.77</b>                        | <b>-0.10</b>                                        | <b>0.5071</b>    |              |               |
|                                                  |                                                    |                                                     | Tobit                                               | Molluscivore                         | Composite ~ AncestryProp                            | 202.26           | 0.06         | 0.6745        |
|                                                  |                                                    |                                                     |                                                     |                                      | <b>Composite ~ AncestryProp + Lake</b>              | <b>195.08</b>    | <b>0.20</b>  | <b>0.1945</b> |
|                                                  |                                                    |                                                     |                                                     |                                      | Composite ~ AncestryProp + Experiment               | 203.74           | 0.03         | 0.8131        |
|                                                  |                                                    |                                                     |                                                     |                                      | Composite ~ AncestryProp + Lake + Experiment        | 196.54           | 0.17         | 0.2700        |
|                                                  |                                                    |                                                     |                                                     |                                      | <b>Composite ~ AncestryProp + Lake * Experiment</b> | <b>196.66</b>    | <b>0.20</b>  | <b>0.2129</b> |
|                                                  | Scale-eater                                        | Composite ~ AncestryProp                            |                                                     |                                      | 201.64                                              | -0.17            | 0.3725       |               |
|                                                  |                                                    | Composite ~ AncestryProp + Lake                     |                                                     |                                      | 196.69                                              | -0.06            | 0.7619       |               |
|                                                  |                                                    | Composite ~ AncestryProp + Experiment               |                                                     |                                      | 201.62                                              | -0.33            | 0.1463       |               |
|                                                  |                                                    | <b>Composite ~ AncestryProp + Lake + Experiment</b> | <b>196.90</b>                                       | <b>-0.22</b>                         | <b>0.3595</b>                                       |                  |              |               |
|                                                  |                                                    |                                                     | <b>Composite ~ AncestryProp + Lake * Experiment</b> | <b>197.61</b>                        | <b>-0.19</b>                                        | <b>0.4393</b>    |              |               |
|                                                  | Growth                                             | Generalist                                          |                                                     | Growth ~ AncestryProp                | 42.47                                               | 0.08             | 0.4084       |               |
|                                                  |                                                    |                                                     |                                                     | Growth ~ AncestryProp + Lake         | 18.85                                               | 0.32             | 0.0010       |               |
|                                                  |                                                    |                                                     |                                                     | Growth ~ AncestryProp + Experiment   | 13.43                                               | -0.32            | 0.0032       |               |
| Growth ~ AncestryProp + Lake + Experiment        |                                                    |                                                     |                                                     | -23.42                               | -0.07                                               | 0.4413           |              |               |
| <b>Growth ~ AncestryProp + Lake * Experiment</b> |                                                    |                                                     |                                                     | <b>-89.90</b>                        | <b>0.10</b>                                         | <b>0.1187</b>    |              |               |
| Gaussian                                         |                                                    |                                                     |                                                     | Molluscivore                         | Growth ~ AncestryProp                               | 42.52            | 0.11         | 0.4231        |
|                                                  |                                                    |                                                     |                                                     |                                      | Growth ~ AncestryProp + Lake                        | 29.24            | -0.13        | 0.3383        |
|                                                  |                                                    |                                                     |                                                     |                                      | Growth ~ AncestryProp + Experiment                  | 13.91            | 0.35         | 0.0041        |
|                                                  |                                                    |                                                     |                                                     |                                      | Growth ~ AncestryProp + Lake + Experiment           | -23.57           | 0.09         | 0.3932        |
|                                                  |                                                    |                                                     |                                                     |                                      | <b>Growth ~ AncestryProp + Lake * Experiment</b>    | <b>-88.32</b>    | <b>-0.07</b> | <b>0.3280</b> |
|                                                  |                                                    | Scale-eater                                         | Growth ~ AncestryProp                               |                                      | 36.71                                               | -0.41            | 0.0122       |               |
|                                                  |                                                    |                                                     | Growth ~ AncestryProp + Lake                        |                                      | 12.25                                               | -0.64            | 0.0000       |               |
|                                                  |                                                    |                                                     | Growth ~ AncestryProp + Experiment                  |                                      | 21.98                                               | 0.14             | 0.4870       |               |
| <b>Growth ~ AncestryProp + Lake + Experiment</b> |                                                    |                                                     | <b>-22.80</b>                                       | <b>0.00</b>                          | <b>0.9950</b>                                       |                  |              |               |
|                                                  |                                                    |                                                     | <b>Growth ~ AncestryProp + Lake * Experiment</b>    | <b>-88.53</b>                        | <b>-0.11</b>                                        | <b>0.2825</b>    |              |               |
| Survival                                         |                                                    | Generalist                                          |                                                     | Survival ~ AncestryProp              | 188.70                                              | -0.13            | 0.7769       |               |
|                                                  |                                                    |                                                     |                                                     | Survival ~ AncestryProp + Lake       | 151.13                                              | -1.59            | 0.0144       |               |
|                                                  |                                                    |                                                     |                                                     | Survival ~ AncestryProp + Experiment | 159.06                                              | 0.92             | 0.0793       |               |
|                                                  | <b>Survival ~ AncestryProp + Lake + Experiment</b> |                                                     |                                                     | <b>123.49</b>                        | <b>-0.54</b>                                        | <b>0.4400</b>    |              |               |
|                                                  | Survival ~ AncestryProp + Lake * Experiment        |                                                     |                                                     | 125.49                               | -0.54                                               | 0.4400           |              |               |
|                                                  | Binomial                                           |                                                     |                                                     | Molluscivore                         | Survival ~ AncestryProp                             | 188.78           | 0.03         | 0.9643        |
|                                                  |                                                    |                                                     |                                                     |                                      | Survival ~ AncestryProp + Lake                      | 155.11           | 1.13         | 0.0936        |
|                                                  |                                                    |                                                     |                                                     |                                      | Survival ~ AncestryProp + Experiment                | 161.41           | -0.53        | 0.3709        |
|                                                  |                                                    |                                                     |                                                     |                                      | <b>Survival ~ AncestryProp + Lake + Experiment</b>  | <b>123.06</b>    | <b>0.76</b>  | <b>0.3127</b> |
|                                                  |                                                    |                                                     |                                                     |                                      | Survival ~ AncestryProp + Lake * Experiment         | 125.06           | 0.76         | 0.3127        |
|                                                  |                                                    | Scale-eater                                         | Survival ~ AncestryProp                             |                                      | 188.61                                              | 0.34             | 0.6756       |               |
|                                                  |                                                    |                                                     | Survival ~ AncestryProp + Lake                      |                                      | 154.93                                              | 1.60             | 0.0852       |               |
|                                                  |                                                    |                                                     | Survival ~ AncestryProp + Experiment                |                                      | 158.99                                              | -1.69            | 0.0828       |               |
|                                                  | <b>Survival ~ AncestryProp + Lake + Experiment</b> |                                                     | <b>124.04</b>                                       | <b>-0.28</b>                         | <b>0.8041</b>                                       |                  |              |               |
|                                                  |                                                    |                                                     | Survival ~ AncestryProp + Lake * Experiment         | 126.04                               | -0.28                                               | 0.8041           |              |               |

**Appendix 1—Table 3. Models tested to assess the extent to which specialist ancestry predicts measures of fitness and their respective fits using all samples and a supervised admixture analysis. Best-fit models are bolded.**

| Fitness Measure | Model Family | Species      | Model                                               | AIC           | Ancestry Coefficient | Ancestry P-value |
|-----------------|--------------|--------------|-----------------------------------------------------|---------------|----------------------|------------------|
| Composite       | Generalist   |              | Composite ~ AncestryProp                            | 201.70        | 0.09                 | 0.3883           |
|                 |              |              | <b>Composite ~ AncestryProp + Lake</b>              | <b>196.79</b> | <b>0.00</b>          | <b>0.9774</b>    |
|                 |              |              | Composite ~ AncestryProp + Experiment               | 201.56        | 0.19                 | 0.1375           |
|                 |              |              | Composite ~ AncestryProp + Lake + Experiment        | 197.39        | 0.08                 | 0.5475           |
|                 |              |              | Composite ~ AncestryProp + Lake * Experiment        | 198.06        | 0.06                 | 0.6961           |
|                 | Tobit        | Molluscivore | Composite ~ AncestryProp                            | 202.39        | -0.03                | 0.8382           |
|                 |              |              | <b>Composite ~ AncestryProp + Lake</b>              | <b>196.49</b> | <b>0.08</b>          | <b>0.5870</b>    |
|                 |              |              | Composite ~ AncestryProp + Experiment               | 203.59        | -0.06                | 0.6576           |
|                 |              |              | Composite ~ AncestryProp + Lake + Experiment        | 197.68        | 0.04                 | 0.7787           |
|                 |              |              | Composite ~ AncestryProp + Lake * Experiment        | 198.03        | 0.07                 | 0.6638           |
|                 | Scale-eater  |              | Composite ~ AncestryProp                            | 201.06        | -0.22                | 0.2395           |
|                 |              |              | Composite ~ AncestryProp + Lake                     | 196.33        | -0.13                | 0.4993           |
|                 |              |              | Composite ~ AncestryProp + Experiment               | 200.40        | -0.41                | 0.0717           |
|                 |              |              | <b>Composite ~ AncestryProp + Lake + Experiment</b> | <b>195.82</b> | <b>-0.32</b>         | <b>0.1705</b>    |
|                 |              |              | Composite ~ AncestryProp + Lake * Experiment        | 196.60        | -0.29                | 0.2091           |
| Growth          | Generalist   |              | Growth ~ AncestryProp                               | 39.30         | 0.17                 | 0.0525           |
|                 |              |              | Growth ~ AncestryProp + Lake                        | 11.24         | 0.37                 | 0.0000           |
|                 |              |              | Growth ~ AncestryProp + Experiment                  | 19.52         | -0.18                | 0.0915           |
|                 |              |              | Growth ~ AncestryProp + Lake + Experiment           | -22.80        | 0.01                 | 0.9525           |
|                 |              |              | <b>Growth ~ AncestryProp + Lake * Experiment</b>    | <b>-93.03</b> | <b>0.14</b>          | <b>0.0206</b>    |
|                 | Gaussian     | Molluscivore | Growth ~ AncestryProp                               | 43.11         | -0.03                | 0.8005           |
|                 |              |              | Growth ~ AncestryProp + Lake                        | 26.45         | -0.23                | 0.0581           |
|                 |              |              | Growth ~ AncestryProp + Experiment                  | 18.62         | 0.23                 | 0.0541           |
|                 |              |              | Growth ~ AncestryProp + Lake + Experiment           | -22.89        | 0.03                 | 0.7653           |
|                 |              |              | <b>Growth ~ AncestryProp + Lake * Experiment</b>    | <b>-89.91</b> | <b>-0.10</b>         | <b>0.1177</b>    |
|                 | Scale-eater  |              | Growth ~ AncestryProp                               | 32.80         | -0.50                | 0.0015           |
|                 |              |              | Growth ~ AncestryProp + Lake                        | 6.53          | -0.69                | 0.0000           |
|                 |              |              | Growth ~ AncestryProp + Experiment                  | 22.48         | -0.02                | 0.9330           |
|                 |              |              | Growth ~ AncestryProp + Lake + Experiment           | -23.14        | -0.09                | 0.5710           |
|                 |              |              | <b>Growth ~ AncestryProp + Lake * Experiment</b>    | <b>-89.59</b> | <b>-0.15</b>         | <b>0.1427</b>    |
| Survival        | Generalist   |              | Survival ~ AncestryProp                             | 188.75        | -0.09                | 0.8445           |
|                 |              |              | Survival ~ AncestryProp + Lake                      | 152.86        | -1.30                | 0.0292           |
|                 |              |              | Survival ~ AncestryProp + Experiment                | 157.53        | 1.13                 | 0.0334           |
|                 |              |              | <b>Survival ~ AncestryProp + Lake + Experiment</b>  | <b>124.09</b> | <b>-0.08</b>         | <b>0.9038</b>    |
|                 |              |              | Survival ~ AncestryProp + Lake * Experiment         | 126.09        | -0.08                | 0.9038           |
|                 | Binomial     | Molluscivore | Survival ~ AncestryProp                             | 188.78        | -0.05                | 0.9246           |
|                 |              |              | Survival ~ AncestryProp + Lake                      | 156.09        | 0.89                 | 0.1683           |
|                 |              |              | Survival ~ AncestryProp + Experiment                | 160.74        | -0.70                | 0.2264           |
|                 |              |              | <b>Survival ~ AncestryProp + Lake + Experiment</b>  | <b>123.85</b> | <b>0.36</b>          | <b>0.6142</b>    |
|                 |              |              | Survival ~ AncestryProp + Lake * Experiment         | 125.85        | 0.36                 | 0.6142           |
|                 | Scale-eater  |              | Survival ~ AncestryProp                             | 188.58        | 0.35                 | 0.6522           |
|                 |              |              | Survival ~ AncestryProp + Lake                      | 155.46        | 1.36                 | 0.1160           |
|                 |              |              | Survival ~ AncestryProp + Experiment                | 158.78        | -1.70                | 0.0770           |
|                 |              |              | <b>Survival ~ AncestryProp + Lake + Experiment</b>  | <b>123.77</b> | <b>-0.64</b>         | <b>0.5753</b>    |
|                 |              |              | Survival ~ AncestryProp + Lake * Experiment         | 125.77        | -0.64                | 0.5753           |

**Appendix 1—Table 4. Models tested to assess the extent to which specialist ancestry predicts measures of fitness and their respective fits using only samples from the second field experiment (Martin and Gould 2020) and an unsupervised admixture analysis. Best-fit models are bolded.**

| Fitness Measure                     | Model Family  | Species      | Model                                  | AIC           | Ancestry Coefficient | Ancestry <i>P</i> -value |        |
|-------------------------------------|---------------|--------------|----------------------------------------|---------------|----------------------|--------------------------|--------|
| Composite                           | Tobit         | Generalist   | Composite ~ AncestryProp               | 187.62        | 0.11                 | 0.5151                   |        |
|                                     |               |              | <b>Composite ~ AncestryProp + Lake</b> | <b>179.83</b> | <b>-0.13</b>         | <b>0.5004</b>            |        |
|                                     |               | -----        |                                        |               | 181.65               | -0.04                    | 0.8924 |
|                                     |               | Molluscivore | Composite ~ AncestryProp               | 188.04        | 0.02                 | 0.9170                   |        |
|                                     |               |              | <b>Composite ~ AncestryProp + Lake</b> | <b>178.97</b> | <b>0.24</b>          | <b>0.2536</b>            |        |
|                                     |               | -----        |                                        |               | 179.95               | -0.04                    | 0.9036 |
|                                     |               | Scale-eater  | Composite ~ AncestryProp               | 186.12        | -0.43                | 0.1743                   |        |
|                                     |               |              | <b>Composite ~ AncestryProp + Lake</b> | <b>179.90</b> | <b>-0.20</b>         | <b>0.5361</b>            |        |
| -----                               |               |              | 180.85                                 | 0.28          | 0.6288               |                          |        |
| Growth                              | Gaussian      | Generalist   | Growth ~ AncestryProp                  | 27.50         | -0.34                | 0.0070                   |        |
|                                     |               |              | Growth ~ AncestryProp + Lake           | -51.14        | 0.08                 | 0.2452                   |        |
|                                     |               |              | <b>Growth ~ AncestryProp * Lake</b>    | <b>-53.47</b> | <b>0.01</b>          | <b>0.9339</b>            |        |
|                                     |               | -----        |                                        |               | 28.21                | 0.38                     | 0.0103 |
|                                     |               | Molluscivore | <b>Growth ~ AncestryProp + Lake</b>    | <b>-50.78</b> | <b>-0.08</b>         | <b>0.3149</b>            |        |
|                                     |               |              | Growth ~ AncestryProp * Lake           | -49.16        | -0.05                | 0.6565                   |        |
|                                     |               | -----        |                                        |               | 34.00                | 0.29                     | 0.3072 |
|                                     |               | Scale-eater  | Growth ~ AncestryProp + Lake           | -50.03        | -0.08                | 0.5823                   |        |
| <b>Growth ~ AncestryProp * Lake</b> | <b>-52.24</b> |              | <b>0.09</b>                            | <b>0.5772</b> |                      |                          |        |
| Survival                            | Binomial      | Generalist   | Survival ~ AncestryProp                | 157.06        | 0.92                 | 0.0793                   |        |
|                                     |               |              | <b>Survival ~ AncestryProp + Lake</b>  | <b>121.49</b> | <b>-0.54</b>         | <b>0.4400</b>            |        |
|                                     |               |              | Survival ~ AncestryProp * Lake         | 123.46        | -0.36                | 0.7660                   |        |
|                                     |               | -----        |                                        |               | 159.41               | -0.53                    | 0.3709 |
|                                     |               | Molluscivore | <b>Survival ~ AncestryProp + Lake</b>  | <b>121.06</b> | <b>0.76</b>          | <b>0.3127</b>            |        |
|                                     |               |              | Survival ~ AncestryProp * Lake         | 122.70        | -0.04                | 0.9788                   |        |
|                                     |               | -----        |                                        |               | 156.99               | -1.69                    | 0.0828 |
|                                     |               | Scale-eater  | <b>Survival ~ AncestryProp + Lake</b>  | <b>122.04</b> | <b>-0.28</b>         | <b>0.8041</b>            |        |
| Survival ~ AncestryProp * Lake      | 123.24        |              | 2.00                                   | 1.0000        |                      |                          |        |

**Appendix 1—Table 5. Models tested to assess the extent to which genome-wide variation (PC1/PC2) predicts measures of fitness and their respective fits using all samples and an unsupervised admixture analysis. Best-fit models are bolded.**

| Fitness Measure | Model Family | Principle Component | Model                                      | AIC           | Ancestry Coefficient | Ancestry <i>P</i> -value |
|-----------------|--------------|---------------------|--------------------------------------------|---------------|----------------------|--------------------------|
| Composite       | Tobit        | PC1                 | <b>Composite ~ PC1</b>                     | <b>193.80</b> | <b>1.67</b>          | <b>0.0043</b>            |
|                 |              |                     | Composite ~ PC1 + Lake                     | 195.52        | 3.07                 | 0.2586                   |
|                 |              |                     | Composite ~ PC1 + Experiment               | 194.27        | 1.80                 | 0.0030                   |
|                 |              |                     | Composite ~ PC1 + Lake + Experiment        | 195.36        | 4.52                 | 0.1233                   |
|                 |              |                     | <b>Composite ~ PC1 + Lake * Experiment</b> | <b>197.07</b> | <b>3.62</b>          | <b>0.2831</b>            |
|                 |              | PC2                 | Composite ~ PC2                            | 202.44        | -0.01                | 0.9907                   |
|                 |              |                     | Composite ~ PC2 + Lake                     | 195.45        | 1.20                 | 0.2456                   |
|                 |              |                     | Composite ~ PC2 + Experiment               | 203.75        | 0.21                 | 0.8294                   |
|                 |              |                     | <b>Composite ~ PC2 + Lake + Experiment</b> | <b>195.21</b> | <b>1.79</b>          | <b>0.1130</b>            |
|                 |              |                     | Composite ~ PC2 + Lake * Experiment        | 196.35        | 1.57                 | 0.1738                   |
| Growth          | Gaussian     | PC1                 | Growth ~ PC1                               | 30.97         | -1.62                | 0.0006                   |
|                 |              |                     | Growth ~ PC1 + Lake                        | 29.37         | 1.57                 | 0.3723                   |
|                 |              |                     | Growth ~ PC1 + Experiment                  | -32.37        | -2.92                | 0.0000                   |
|                 |              |                     | Growth ~ PC1 + Lake + Experiment           | -30.92        | -3.87                | 0.0055                   |
|                 |              |                     | <b>Growth ~ PC1 + Lake * Experiment</b>    | <b>-87.40</b> | <b>0.33</b>          | <b>0.7638</b>            |
|                 |              | PC2                 | Growth ~ PC2                               | 23.61         | 2.88                 | 0.0002                   |
|                 |              |                     | Growth ~ PC2 + Lake                        | 23.61         | 2.00                 | 0.0119                   |
|                 |              |                     | Growth ~ PC2 + Experiment                  | 14.04         | 2.04                 | 0.0044                   |
|                 |              |                     | Growth ~ PC2 + Lake + Experiment           | -23.65        | -0.61                | 0.3677                   |
|                 |              |                     | <b>Growth ~ PC2 + Lake * Experiment</b>    | <b>-87.49</b> | <b>0.20</b>          | <b>0.6724</b>            |
| Survival        | Binomial     | PC1                 | Survival ~ PC1                             | 156.24        | 15.09                | 0.0000                   |
|                 |              |                     | Survival ~ PC1 + Lake                      | 157.87        | 6.04                 | 0.6943                   |
|                 |              |                     | <b>Survival ~ PC1 + Experiment</b>         | <b>121.52</b> | <b>17.78</b>         | <b>0.0000</b>            |
|                 |              |                     | Survival ~ PC1 + Lake + Experiment         | 123.51        | 15.92                | 0.4386                   |
|                 |              |                     | Survival ~ PC1 + Lake * Experiment         | 125.51        | 15.92                | 0.4386                   |
|                 |              | PC2                 | Survival ~ PC2                             | 157.96        | -9.44                | 0.0268                   |
|                 |              |                     | Survival ~ PC2 + Lake                      | 157.96        | -1.21                | 0.7988                   |
|                 |              |                     | Survival ~ PC2 + Experiment                | 160.72        | -5.63                | 0.2248                   |
|                 |              |                     | <b>Survival ~ PC2 + Lake + Experiment</b>  | <b>123.39</b> | <b>4.89</b>          | <b>0.4047</b>            |
|                 |              |                     | Survival ~ PC2 + Lake * Experiment         | 125.39        | 4.89                 | 0.4047                   |

**Appendix 1—Table 6. SNPs found to be strongly associated with composite fitness using SnpEff (136).** SNPs that were identified as being strongly associated with both growth and composite fitness are italicized, and those that remain significant after a Bonferroni correction are bolded.

| Scaffold              | Position        | Significance      | REF      | ALT      | Variant Type                          | Gene Identifier                               | Gene Card              |
|-----------------------|-----------------|-------------------|----------|----------|---------------------------------------|-----------------------------------------------|------------------------|
| HiC_scaffold_1        | 32071263        | FDR               | A        | C        | intergenic                            | CBRO_00000660-CBRO_00000661                   | Znf250-Ptgdr2          |
| <b>HiC_scaffold_1</b> | <b>43866598</b> | <b>Bonferroni</b> | <b>G</b> | <b>A</b> | <b>intergenic</b>                     | <b>CBRO_00000910-CBRO_00000911</b>            | <b>PPM1K-OVCH2</b>     |
| HiC_scaffold_1        | 43867614        | FDR               | C        | T        | intergenic                            | CBRO_00000910-CBRO_00000911                   | PPM1K-OVCH2            |
| HiC_scaffold_3        | 2658774         | FDR               | T        | A        | intergenic                            | CBRO_00017856-CBRO_00017857                   | KMT2E-Magi2            |
| HiC_scaffold_3        | 2658775         | FDR               | T        | C        | intergenic                            | CBRO_00017856-CBRO_00017857                   | KMT2E-Magi2            |
| HiC_scaffold_3        | 2658793         | FDR               | C        | A        | intergenic                            | CBRO_00017856-CBRO_00017857                   | KMT2E-Magi2            |
| HiC_scaffold_4        | 18899496        | FDR               | T        | C        | intergenic                            | CBRO_00012427-CBRO_00012428                   | UNKNOWN-edc4           |
| HiC_scaffold_5        | 18306419        | FDR               | C        | G        | upstream; intergenic                  | CBRO_00001232;<br>CBRO_00001231-CBRO_00001232 | xlrs1; PPEF2-xlrs1     |
| HiC_scaffold_5        | 18306428        | FDR               | A        | T        | upstream; intergenic                  | CBRO_00001232;<br>CBRO_00001231-CBRO_00001232 | xlrs1; PPEF2-xlrs1     |
| HiC_scaffold_5        | 18307019        | FDR               | G        | T        | intronic                              | CBRO_00001232                                 | xlrs1                  |
| HiC_scaffold_5        | 18307030        | FDR               | G        | A        | intronic                              | CBRO_00001232                                 | xlrs1                  |
| HiC_scaffold_5        | 18311696        | FDR               | C        | T        | intronic                              | CBRO_00001232                                 | xlrs1                  |
| HiC_scaffold_5        | 40475116        | FDR               | T        | A        | intergenic                            | CBRO_00001627-CBRO_00001628                   | SLC25A44-UBE2Q2        |
| HiC_scaffold_7        | 10290141        | FDR               | T        | C        | downstream; intergenic                | CBRO_00009717;<br>CBRO_00009716-CBRO_00009717 | Nfkbie; SLC35B2-Nfkbie |
| HiC_scaffold_7        | 10290142        | FDR               | G        | C        | downstream; intergenic                | CBRO_00009717;<br>CBRO_00009716-CBRO_00009717 | Nfkbie; SLC35B2-Nfkbie |
| HiC_scaffold_7        | 10290165        | FDR               | A        | G        | downstream; intergenic                | CBRO_00009717;<br>CBRO_00009716-CBRO_00009717 | Nfkbie; SLC35B2-Nfkbie |
| HiC_scaffold_7        | 10290166        | FDR               | T        | C        | downstream; intergenic                | CBRO_00009717;<br>CBRO_00009716-CBRO_00009717 | Nfkbie; SLC35B2-Nfkbie |
| HiC_scaffold_7        | 10290168        | FDR               | T        | C        | downstream; intergenic<br>synonymous; | CBRO_00009717;<br>CBRO_00009716-CBRO_00009717 | Nfkbie; SLC35B2-Nfkbie |
| HiC_scaffold_7        | 13815058        | FDR               | A        | G        | downstream                            | CBRO_00009805; CBRO_00009804                  | Aloxe3; UNKNOWN        |
| HiC_scaffold_7        | 13815326        | FDR               | C        | T        | intronic                              | CBRO_00009805                                 | Aloxe3                 |
| HiC_scaffold_7        | 15349830        | FDR               | C        | A        | intergenic                            | CBRO_00009834-CBRO_00009835                   | Adcy8-efr3b            |

*Hybridization alters the fitness landscape*

|                        |                 |                   |          |          |                             |                                                   |                              |
|------------------------|-----------------|-------------------|----------|----------|-----------------------------|---------------------------------------------------|------------------------------|
| HiC_scaffold_7         | 18378061        | FDR               | T        | A        | intergenic                  | CBRO_00009902-CBRO_00009903                       | Fam84a-DDX1                  |
| <b>HiC_scaffold_8</b>  | <b>20263964</b> | <b>Bonferroni</b> | <b>G</b> | <b>A</b> | <b>upstream; intergenic</b> | <b>CBRO_00010647; CBRO_00010647-CBRO_00010648</b> | <b>Srcin1; Srcin1-Srcin1</b> |
| HiC_scaffold_8         | 31539262        | FDR               | G        | A        | upstream; intergenic        | CBRO_00010835; CBRO_00010834-CBRO_00010835        | Gjd3; Gjd3-Gjd3              |
| HiC_scaffold_11        | 3106766         | FDR               | T        | A        | intronic                    | CBRO_00013361                                     | prkdc                        |
| HiC_scaffold_11        | 3138733         | FDR               | G        | A        | intergenic                  | CBRO_00013361-CBRO_00013362                       | prkdc-arhgap29               |
| HiC_scaffold_11        | 5658921         | FDR               | A        | G        | intronic                    | CBRO_00013404                                     | KAZN                         |
| HiC_scaffold_14        | 17556007        | FDR               | C        | T        | intergenic                  | CBRO_00014134-CBRO_00014135                       | UNKNOWN-Abr                  |
| HiC_scaffold_14        | 17556026        | FDR               | C        | A        | intergenic                  | CBRO_00014134-CBRO_00014135                       | UNKNOWN-Abr                  |
| HiC_scaffold_16        | 32837191        | FDR               | T        | C        | intronic                    | CBRO_00003226                                     | KIF1B                        |
| HiC_scaffold_16        | 35727503        | FDR               | G        | C        | intergenic                  | CBRO_00003289-CBRO_00003290                       | Pip5k1c-Polr2e               |
| HiC_scaffold_16        | 40215889        | FDR               | G        | A        | intergenic                  | CBRO_00003383-CBRO_00003384                       | chst10-UNKNOWN               |
| HiC_scaffold_16        | 40300592        | FDR               | C        | A        | intergenic                  | CBRO_00003384-CBRO_00003385                       | UNKNOWN-Carmil3              |
| HiC_scaffold_18        | 26969972        | FDR               | T        | G        | intronic                    | CBRO_00013239                                     | CSAD                         |
| HiC_scaffold_18        | 26970123        | FDR               | C        | T        | synonymous                  | CBRO_00013239                                     | CSAD                         |
| HiC_scaffold_18        | 26970601        | FDR               | T        | A        | intronic                    | CBRO_00013239                                     | CSAD                         |
| HiC_scaffold_18        | 26978410        | FDR               | G        | A        | intronic                    | CBRO_00013240                                     | Znf740                       |
| HiC_scaffold_20        | 332642          | FDR               | G        | A        | missense                    | CBRO_00016084                                     | GTF3C4                       |
| HiC_scaffold_20        | 332689          | FDR               | A        | G        | missense                    | CBRO_00016084                                     | GTF3C4                       |
| HiC_scaffold_20        | 14820437        | FDR               | A        | T        | intronic                    | CBRO_00016304                                     | MALT1                        |
| HiC_scaffold_20        | 14820448        | FDR               | T        | C        | intronic                    | CBRO_00016304                                     | MALT1                        |
| HiC_scaffold_24        | 1469530         | FDR               | G        | T        | intergenic                  | CBRO_00014375-CBRO_00014376                       | UNKNOWN-UNKNOWN              |
| HiC_scaffold_24        | 3223583         | FDR               | T        | A        | intergenic                  | CBRO_00014421-CBRO_00014422                       | Gal3st3-RIN2                 |
| HiC_scaffold_24        | 11618442        | FDR               | T        | G        | intronic                    | CBRO_00014601                                     | ABCA4                        |
| <b>HiC_scaffold_24</b> | <b>15964553</b> | <b>Bonferroni</b> | <b>C</b> | <b>T</b> | <b>intergenic</b>           | <b>CBRO_00014635-CBRO_00014636</b>                | <b>Lrfn2-SNX15</b>           |
| HiC_scaffold_27        | 1898180         | FDR               | G        | A        | downstream; intergenic      | CBRO_00005887; CBRO_00005886-CBRO_00005887        | UNKNOWN; hoxb13a-UNKNOWN     |
| HiC_scaffold_27        | 8137335         | FDR               | G        | T        | intronic                    | CBRO_00005998                                     | SMARCA4                      |
| HiC_scaffold_27        | 9065056         | FDR               | C        | A        | intergenic                  | CBRO_00006026-CBRO_00006027                       | ANKFN1-ccdc134               |
| HiC_scaffold_27        | 12370585        | FDR               | C        | T        | intergenic                  | CBRO_00006131-CBRO_00006132                       | SHISA9-Desil                 |



*Hybridization alters the fitness landscape*

|                        |                 |                   |          |          |                        |                                                                               |                                                            |
|------------------------|-----------------|-------------------|----------|----------|------------------------|-------------------------------------------------------------------------------|------------------------------------------------------------|
| HiC_scaffold_27        | 32078665        | FDR               | C        | G        | intergenic             | CBRO_00006685-CBRO_00006686                                                   | med25-Lrrc4b                                               |
| HiC_scaffold_27        | 34904388        | FDR               | A        | C        | intergenic             | CBRO_00006756-CBRO_00006757                                                   | Grin2c-nog3                                                |
| HiC_scaffold_27        | 35431570        | FDR               | G        | C        | intergenic             | CBRO_00006756-CBRO_00006757                                                   | Grin2c-nog3                                                |
| HiC_scaffold_27        | 35431578        | FDR               | C        | T        | intergenic             | CBRO_00006756-CBRO_00006757                                                   | Grin2c-nog3                                                |
| HiC_scaffold_27        | 35431585        | FDR               | A        | G        | intergenic             | CBRO_00006756-CBRO_00006757                                                   | Grin2c-nog3                                                |
| HiC_scaffold_34        | 16654675        | FDR               | G        | C        | intergenic             | CBRO_00001997-CBRO_00001998<br>CBRO_00002027; CBRO_00002027-<br>CBRO_00002028 | MDFIC2-foxp1b<br>SUOX; SUOX-SUOX                           |
| HiC_scaffold_34        | 19393244        | FDR               | A        | T        | upstream; intergenic   | CBRO_00002117                                                                 | GNAI2                                                      |
| HiC_scaffold_34        | 22010499        | FDR               | C        | T        | intronic               | CBRO_00002389; CBRO_00002388-<br>CBRO_00002389                                | CTTNBP2NL; Kcnd3-CTTNBP2NL                                 |
| HiC_scaffold_34        | 31220916        | FDR               | T        | A        | upstream; intergenic   | CBRO_00002519-CBRO_00002520                                                   | ASIC2-asic1                                                |
| HiC_scaffold_34        | 37769304        | FDR               | A        | C        | intergenic             | CBRO_00011020-CBRO_00011021                                                   | C14orf93-pim2                                              |
| HiC_scaffold_37        | 5963405         | FDR               | T        | C        | intergenic             | CBRO_00011155-CBRO_00011156                                                   | GALNT12-elp2                                               |
| HiC_scaffold_37        | 11017168        | FDR               | G        | A        | intergenic             | CBRO_00011221; CBRO_00011220-<br>CBRO_00011221                                | SATB1; KCNH8-SATB1                                         |
| HiC_scaffold_37        | 13822135        | FDR               | A        | G        | upstream; intergenic   | CBRO_00011221; CBRO_00011220-<br>CBRO_00011221                                | SATB1; KCNH8-SATB1                                         |
| HiC_scaffold_37        | 13823678        | FDR               | G        | A        | upstream; intergenic   | CBRO_00011221                                                                 | SATB1                                                      |
| HiC_scaffold_37        | 13832007        | FDR               | T        | A        | missense               | CBRO_00011259-CBRO_00011260                                                   | CSMD1-UNKNOWN                                              |
| HiC_scaffold_37        | 16920863        | FDR               | T        | C        | intergenic             | <b>CBRO_00011301-CBRO_00011302</b>                                            | <b>cck-trim71</b>                                          |
| <b>HiC_scaffold_37</b> | <b>18591438</b> | <b>Bonferroni</b> | <b>G</b> | <b>A</b> | <b>intergenic</b>      | <b>CBRO_00011301-CBRO_00011302</b>                                            | <b>cck-trim71</b>                                          |
| HiC_scaffold_37        | 18591463        | FDR               | C        | T        | intergenic             | CBRO_00011301-CBRO_00011302                                                   | cck-trim71                                                 |
| HiC_scaffold_37        | 18596716        | FDR               | A        | T        | intergenic             | CBRO_00011301-CBRO_00011302<br>CBRO_00016614; CBRO_00016613-<br>CBRO_00016614 | cck-trim71<br>C14orf93 homolog; HTR2A-<br>C14orf93 homolog |
| HiC_scaffold_40        | 5885291         | FDR               | G        | T        | downstream; intergenic | CBRO_00008246-CBRO_00008247                                                   | UNKNOWN-Gpr68                                              |
| HiC_scaffold_43        | 2568535         | FDR               | A        | G        | intergenic             | CBRO_00007276-CBRO_00007277<br>CBRO_00018766; CBRO_00018766-<br>CBRO_00018767 | RAPGEF2-QDPR                                               |
| HiC_scaffold_44        | 25886134        | FDR               | A        | C        | intergenic             | CBRO_00018814                                                                 | Mog; Mog-EPHB4                                             |
| HiC_scaffold_45        | 885834          | FDR               | A        | C        | upstream; intergenic   | CBRO_0007439-CBRO_0007440                                                     | Nlrp12                                                     |
| HiC_scaffold_45        | 2213441         | FDR               | G        | T        | intronic               | CBRO_0007448                                                                  | UNKNOWN-NLRP12                                             |
| HiC_scaffold_46        | 856248          | FDR               | A        | G        | intergenic             |                                                                               | NEB                                                        |
| HiC_scaffold_46        | 1232350         | FDR               | G        | A        | intronic               |                                                                               |                                                            |

Hybridization alters the fitness landscape

|                        |                 |                   |          |          |                                     |                                                              |                                      |
|------------------------|-----------------|-------------------|----------|----------|-------------------------------------|--------------------------------------------------------------|--------------------------------------|
| HiC_scaffold_46        | 30183758        | FDR               | C        | G        | intergenic                          | CBRO_00008059-CBRO_00008060                                  | TFRC-Rgs11                           |
| HiC_scaffold_46        | 32048848        | FDR               | A        | C        | intronic                            | CBRO_00008105                                                | Hsd17b7                              |
| HiC_scaffold_46        | 32050109        | FDR               | G        | T        | synonymous                          | CBRO_00008105                                                | Hsd17b7                              |
| <b>HiC_scaffold_46</b> | <b>35151009</b> | <b>Bonferroni</b> | <b>T</b> | <b>C</b> | <b>downstream; intergenic</b>       | <b>CBRO_00008165; CBRO_00008165-<br/>CBRO_00008166</b>       | <b>Klf9; Klf9-Tsen15</b>             |
| HiC_scaffold_46        | 35163681        | FDR               | T        | C        | downstream; intergenic              | CBRO_00008166; CBRO_00008167;<br>CBRO_00008166-CBRO_00008167 | Tsen15; UNKNOWN; Tsen15-<br>UNKNOWN  |
| HiC_scaffold_46        | 35164267        | FDR               | A        | G        | downstream; intergenic              | CBRO_00008166; CBRO_00008167;<br>CBRO_00008166-CBRO_00008167 | Tsen15; UNKNOWN; Tsen15-<br>UNKNOWN  |
| HiC_scaffold_47        | 787141          | FDR               | T        | G        | upstream; intergenic                | CBRO_00008838; CBRO_00008837-<br>CBRO_00008838               | Nlrc3; NLRC3-Nlrc3                   |
| HiC_scaffold_47        | 4300295         | FDR               | G        | A        | downstream; intergenic              | CBRO_00008933; CBRO_00008933-<br>CBRO_00008934               | NEK6; NEK6-Psmb7                     |
| HiC_scaffold_47        | 6767766         | FDR               | T        | C        | intergenic                          | CBRO_00008991-CBRO_00008992                                  | TACR1-Grk5                           |
| HiC_scaffold_52        | 20791197        | FDR               | T        | A        | upstream; intronic                  | CBRO_00011892; CBRO_00011891                                 | rabl3; GTF2E1                        |
| HiC_scaffold_52        | 22551701        | FDR               | G        | C        | intergenic                          | CBRO_00011922-CBRO_00011923                                  | ALS2-Serp2                           |
| HiC_scaffold_52        | 31021517        | FDR               | C        | T        | intergenic                          | CBRO_00012051-CBRO_00012052                                  | Tmeff2-slc39a10                      |
| <b>HiC_scaffold_53</b> | <b>11317840</b> | <b>Bonferroni</b> | <b>A</b> | <b>G</b> | <b>intergenic</b>                   | <b>CBRO_00005178-CBRO_00005179</b>                           | <b>Fucoatlectin-1-Fucoatlectin-5</b> |
| HiC_scaffold_53        | 11326035        | FDR               | C        | T        | intergenic                          | CBRO_00005178-CBRO_00005179                                  | Fucoatlectin-1-Fucoatlectin-5        |
| HiC_scaffold_53        | 11326410        | FDR               | G        | A        | intergenic                          | CBRO_00005178-CBRO_00005179                                  | Fucoatlectin-1-Fucoatlectin-5        |
| HiC_scaffold_53        | 11331079        | FDR               | A        | G        | intergenic                          | CBRO_00005178-CBRO_00005179                                  | Fucoatlectin-1-Fucoatlectin-5        |
| HiC_scaffold_53        | 15966447        | FDR               | G        | A        | upstream; downstream;<br>intergenic | CBRO_00005235; CBRO_00005234;<br>CBRO_00005234-CBRO_00005235 | Tmem222; WDTC1; WDTC1-<br>Tmem222    |
| HiC_scaffold_53        | 17413090        | FDR               | A        | G        | missense                            | CBRO_00005274                                                | Mag                                  |
| HiC_scaffold_53        | 20715576        | FDR               | C        | A        | intergenic                          | CBRO_00005380-CBRO_00005381                                  | Srct2-Ino80c                         |
| HiC_scaffold_53        | 20715623        | FDR               | G        | A        | intergenic                          | CBRO_00005380-CBRO_00005381                                  | Srct2-Ino80c                         |
| HiC_scaffold_53        | 20715851        | FDR               | A        | G        | intergenic                          | CBRO_00005380-CBRO_00005381                                  | Srct2-Ino80c                         |
| HiC_scaffold_53        | 27386094        | FDR               | G        | T        | intronic                            | CBRO_00005625                                                | Arhgef1                              |
| HiC_scaffold_53        | 27396961        | FDR               | T        | A        | intronic                            | CBRO_00005625                                                | Arhgef1                              |
| HiC_scaffold_53        | 27398605        | FDR               | T        | G        | downstream; intergenic              | CBRO_00005625; CBRO_00005625-<br>CBRO_00005626               | Arhgef1; Arhgef1-CD79A               |
| HiC_scaffold_53        | 33282501        | FDR               | A        | G        | intergenic                          | CBRO_00005732-CBRO_00005733                                  | mios-GLCCI1                          |

*Hybridization alters the fitness landscape*

|                          |                 |                   |          |          |                        |                                        |                            |
|--------------------------|-----------------|-------------------|----------|----------|------------------------|----------------------------------------|----------------------------|
| HiC_scaffold_53          | 39228193        | FDR               | T        | C        | intergenic             | CBRO_00005830-CBRO_00005831            | UNKNOWN-GnRHR2             |
| <b>HiC_scaffold_53</b>   | <b>39228264</b> | <b>Bonferroni</b> | <b>C</b> | <b>T</b> | <b>intergenic</b>      | <b>CBRO_00005830-CBRO_00005831</b>     | <b>UNKNOWN-GnRHR2</b>      |
| HiC_scaffold_53          | 39228942        | FDR               | A        | T        | intergenic             | CBRO_00005830-CBRO_00005831            | UNKNOWN-GnRHR2             |
| HiC_scaffold_53          | 39279263        | FDR               | G        | T        | intronic               | CBRO_00005832                          | IGDCC3                     |
| HiC_scaffold_53          | 39770914        | FDR               | A        | T        | intronic               | CBRO_00005849                          | Cpne4                      |
| HiC_scaffold_611         | 5621            | FDR               | A        | T        | intergenic             | CHR_START-CBRO_00020243                | CHR_START-fzdz-a           |
| HiC_scaffold_611         | 5625            | FDR               | G        | T        | intergenic             | CHR_START-CBRO_00020243                | CHR_START-fzdz-a           |
| HiC_scaffold_611         | 5634            | FDR               | T        | A        | intergenic             | CHR_START-CBRO_00020243                | CHR_START-fzdz-a           |
| HiC_scaffold_1053        | 3494            | FDR               | A        | G        | downstream; intergenic | CBRO_00020503; CHR_START-CBRO_00020503 | UBE2G2; CHR_START-UBE2G2   |
| HiC_scaffold_1133        | 9946            | FDR               | A        | G        | intergenic             | .                                      | .                          |
| HiC_scaffold_1371        | 7318            | FDR               | C        | T        | upstream; intergenic   | CBRO_00021026; CHR_START-CBRO_00021026 | UNKNOWN; CHR_START-UNKNOWN |
| <b>HiC_scaffold_1848</b> | <b>40119</b>    | <b>Bonferroni</b> | <b>C</b> | <b>A</b> | <b>intergenic</b>      | .                                      | .                          |
| <b>HiC_scaffold_1848</b> | <b>40465</b>    | <b>Bonferroni</b> | <b>T</b> | <b>A</b> | <b>intergenic</b>      | .                                      | .                          |
| <b>HiC_scaffold_1848</b> | <b>40590</b>    | <b>Bonferroni</b> | <b>T</b> | <b>C</b> | <b>intergenic</b>      | .                                      | .                          |
| HiC_scaffold_1848        | 40877           | FDR               | T        | C        | intergenic             | .                                      | .                          |
| HiC_scaffold_1848        | 41351           | FDR               | T        | C        | intergenic             | .                                      | .                          |
| HiC_scaffold_2220        | 10128           | FDR               | G        | T        | intergenic             | .                                      | .                          |
| <b>HiC_scaffold_4461</b> | <b>12939</b>    | <b>Bonferroni</b> | <b>T</b> | <b>A</b> | <b>intergenic</b>      | .                                      | .                          |
| HiC_scaffold_4665        | 13941           | FDR               | C        | T        | intergenic             | .                                      | .                          |
| HiC_scaffold_6275        | 6000            | FDR               | C        | A        | intergenic             | .                                      | .                          |
| HiC_scaffold_6337        | 5745            | FDR               | T        | G        | intronic               | CBRO_00021217                          | PKP3                       |
| HiC_scaffold_6769        | 2796            | FDR               | G        | A        | intergenic             | .                                      | .                          |
| HiC_scaffold_6963        | 5970            | FDR               | C        | A        | intergenic             | .                                      | .                          |
| HiC_scaffold_6963        | 6101            | FDR               | A        | G        | intergenic             | .                                      | .                          |
| HiC_scaffold_9280        | 3448            | FDR               | G        | A        | intergenic             | .                                      | .                          |
| HiC_scaffold_9949        | 52              | FDR               | C        | T        | intergenic             | .                                      | .                          |
| HiC_scaffold_10928       | 3575            | FDR               | G        | A        | downstream; intergenic | CBRO_00021896; CHR_START-CBRO_00021896 | CYP2A10; CHR_START-CYP2A10 |
| HiC_scaffold_11921       | 5560            | FDR               | A        | T        | intergenic             | .                                      | .                          |
| HiC_scaffold_12068       | 2929            | FDR               | G        | T        | intergenic             | .                                      | .                          |

*Hybridization alters the fitness landscape*

|                           |             |                   |          |          |                   |                      |               |
|---------------------------|-------------|-------------------|----------|----------|-------------------|----------------------|---------------|
| <b>HiC_scaffold_1277</b>  |             |                   |          |          |                   |                      |               |
| <b>8</b>                  | <b>1456</b> | <b>Bonferroni</b> | <b>T</b> | <b>A</b> | <b>missense</b>   | <b>CBRO_00022026</b> | <b>COL8A1</b> |
| HiC_scaffold_17578        | 180         | FDR               | T        | G        | intergenic        | .                    | .             |
| <b>HiC_scaffold_18999</b> | <b>1084</b> | <b>Bonferroni</b> | <b>A</b> | <b>G</b> | <b>intergenic</b> | .                    | .             |

---

**Appendix 1—Table 7. Gene ontology term enrichment for genes associated with composite fitness.**

| Functional Category                                 | Enrichment FDR | Genes in list | Total genes | Genes                                                                                                                                                                                                                                                 |
|-----------------------------------------------------|----------------|---------------|-------------|-------------------------------------------------------------------------------------------------------------------------------------------------------------------------------------------------------------------------------------------------------|
| Anterograde trans-synaptic signaling                | 0.0060         | 13            | 746         | GRIN2C, SHISA9, ALS2, KIF1B, ASIC1, GNAI2, TACR1, ADCY8, LRFN2, ABR, RAPGEF2, ASIC2, PIP5K1C                                                                                                                                                          |
| Synaptic signaling                                  | 0.0060         | 13            | 762         | GRIN2C, SHISA9, ALS2, KIF1B, ASIC1, GNAI2, TACR1, ADCY8, LRFN2, ABR, RAPGEF2, ASIC2, PIP5K1C                                                                                                                                                          |
| Trans-synaptic signaling                            | 0.0060         | 13            | 756         | GRIN2C, SHISA9, ALS2, KIF1B, ASIC1, GNAI2, TACR1, ADCY8, LRFN2, ABR, RAPGEF2, ASIC2, PIP5K1C                                                                                                                                                          |
| Chemical synaptic transmission                      | 0.0060         | 13            | 746         | GRIN2C, SHISA9, ALS2, KIF1B, ASIC1, GNAI2, TACR1, ADCY8, LRFN2, ABR, RAPGEF2, ASIC2, PIP5K1C                                                                                                                                                          |
| Regulation of I-kappaB kinase/NF-kappaB signaling   | 0.0179         | 7             | 241         | NEK6, SLC35B2, MALT1, NLRP12, NLRC3, DDX1, PIM2                                                                                                                                                                                                       |
| Regulation of trans-synaptic signaling              | 0.0185         | 9             | 468         | GRIN2C, SHISA9, ASIC1, GNAI2, TACR1, ADCY8, LRFN2, ABR, RAPGEF2                                                                                                                                                                                       |
| Regulation of cell communication                    | 0.0185         | 32            | 3903        | NEK6, SLC35B2, MALT1, NLRP12, PPEF2, GRIN2C, NLRC3, SLC39A10, SHISA9, ALS2, RAPGEF2, SMARCA4, MAGI2, RGS11, ARHGEF1, DDX1, PIM2, ASIC1, GNAI2, TACR1, ADCY8, LRFN2, ABR, PTGDR2, CCK, GPR68, MIOS, SCRT2, PSMB7, ARHGAP29, PIP5K1C, GRK5              |
| Regulation of signaling                             | 0.0185         | 32            | 3952        | NEK6, SLC35B2, MALT1, NLRP12, PPEF2, GRIN2C, NLRC3, SLC39A10, SHISA9, ALS2, RAPGEF2, SMARCA4, MAGI2, RGS11, ARHGEF1, DDX1, PIM2, ASIC1, GNAI2, TACR1, ADCY8, LRFN2, ABR, PTGDR2, CCK, GPR68, MIOS, SCRT2, PSMB7, ARHGAP29, PIP5K1C, GRK5              |
| Modulation of chemical synaptic transmission        | 0.0185         | 9             | 467         | GRIN2C, SHISA9, ASIC1, GNAI2, TACR1, ADCY8, LRFN2, ABR, RAPGEF2                                                                                                                                                                                       |
| Sensory perception of sour taste                    | 0.0185         | 2             | 5           | ASIC2, ASIC1                                                                                                                                                                                                                                          |
| Regulation of biological quality                    | 0.0185         | 34            | 4319        | GRIN2C, KCNH8, SLC39A10, SHISA9, PRKDC, TACR1, SMARCA4, KCND3, ABCA4, TRIM71, KMT2E, TFRC, PIM2, MAG, ASIC2, ASIC1, GNAI2, LRRRC4B, HSD17B7, WDTIC1, ADCY8, LRFN2, ABR, ALOXE3, CSMD1, CCK, SRCIN1, ALS2, GPR68, RAPGEF2, NEB, PSMB7, NFKBIE, PIP5K1C |
| I-kappaB kinase/NF-kappaB signaling                 | 0.0185         | 7             | 280         | NEK6, SLC35B2, MALT1, NLRP12, NLRC3, DDX1, PIM2                                                                                                                                                                                                       |
| Positive regulation of catalytic activity           | 0.0185         | 17            | 1514        | PPM1K, ALS2, RAPGEF2, MAGI2, SRCIN1, RGS11, ARHGEF1, GNAI2, GTF3C4, RIN2, ARHGAP29, ABR, CCK, SLC39A10, MALT1, ADCY8, NLRP12                                                                                                                          |
| Regulation of protein tyrosine phosphatase activity | 0.0216         | 2             | 6           | GNAI2, SLC39A10                                                                                                                                                                                                                                       |
| Multicellular organismal response to stress         | 0.0216         | 4             | 74          | ALS2, ASIC1, TACR1, CCK                                                                                                                                                                                                                               |
| Positive regulation of molecular function           | 0.0270         | 19            | 1901        | PPM1K, MALT1, ALS2, RAPGEF2, SMARCA4, MAGI2, SRCIN1, RGS11, ARHGEF1, GNAI2, GTF3C4, RIN2, ARHGAP29, ADCY8, ABR, CCK, SLC39A10, MED25, NLRP12                                                                                                          |
| Cell-cell signaling                                 | 0.0311         | 18            | 1774        | GRIN2C, SHISA9, ALS2, KIF1B, ASIC1, GNAI2, TACR1, ADCY8, LRFN2, ABR, GRK5, GPR68, SMARCA4, RAPGEF2, MAGI2, ASIC2, PSMB7, PIP5K1C                                                                                                                      |
| Tachykinin receptor signaling pathway               | 0.0314         | 2             | 8           | TACR1, GRK5                                                                                                                                                                                                                                           |
| Cell proliferation                                  | 0.0355         | 20            | 2165        | TFRC, PIM2, RAPGEF2, CD79A, GNAI2, TACR1, COL8A1, MALT1, SATB1, PTGDR2, CCK, SLC39A10, TRIM71, PRKDC, MED25, KLF9, GRK5, NLRC3, MAGI2, ARHGEF1                                                                                                        |
| Behavioral fear response                            | 0.0355         | 3             | 39          | ALS2, ASIC1, CCK                                                                                                                                                                                                                                      |
| Response to pH                                      | 0.0355         | 3             | 41          | ASIC1, ASIC2, GPR68                                                                                                                                                                                                                                   |
| Behavioral defense response                         | 0.0355         | 3             | 40          | ALS2, ASIC1, CCK                                                                                                                                                                                                                                      |
| Fear response                                       | 0.0355         | 3             | 41          | ALS2, ASIC1, CCK                                                                                                                                                                                                                                      |
| Positive regulation of hydrolase activity           | 0.0401         | 11            | 833         | ALS2, RAPGEF2, MAGI2, RGS11, ARHGEF1, RIN2, ARHGAP29, ABR, CCK, SLC39A10, NLRP12                                                                                                                                                                      |
| ncRNA transcription                                 | 0.0457         | 4             | 110         | GTF3C4, SMARCA4, POLR2E, GTF2E1                                                                                                                                                                                                                       |
| Hexose mediated signaling                           | 0.0457         | 2             | 13          | SMARCA4, ADCY8                                                                                                                                                                                                                                        |
| Sugar mediated signaling pathway                    | 0.0457         | 2             | 13          | SMARCA4, ADCY8                                                                                                                                                                                                                                        |
| Glucose mediated signaling pathway                  | 0.0457         | 2             | 13          | SMARCA4, ADCY8                                                                                                                                                                                                                                        |
| Positive regulation of cell communication           | 0.0457         | 18            | 1937        | NEK6, SLC35B2, MALT1, GRIN2C, SLC39A10, ALS2, RAPGEF2, SMARCA4, NLRP12, DDX1, PIM2, GNAI2, TACR1, ADCY8, PTGDR2, GPR68, MIOS, PSMB7                                                                                                                   |
| Positive regulation of signaling                    | 0.0457         | 18            | 1945        | NEK6, SLC35B2, MALT1, GRIN2C, SLC39A10, ALS2, RAPGEF2, SMARCA4, NLRP12, DDX1, PIM2, GNAI2, TACR1, ADCY8, PTGDR2, GPR68, MIOS, PSMB7                                                                                                                   |

**Appendix 1—Table 8. SNPs found to be strongly associated with growth SnpEff (136).** SNPs that were identified as being strongly associated with both growth and composite fitness are italicized, and those that remain significant after a Bonferroni correction are bolded.

| <b>Scaffold</b>       | <b>Position</b> | <b>Significance</b> | <b>REF</b> | <b>ALT</b> | <b>Variant Type</b>           | <b>Gene Identifier</b>                                 | <b>Gene Card</b>          |
|-----------------------|-----------------|---------------------|------------|------------|-------------------------------|--------------------------------------------------------|---------------------------|
| HiC_scaffold_4        | 8897671         | FDR                 | A          | T          | intergenic                    | CBRO_00012254-CBRO_00012255                            | Megf10-UNKNOWN            |
| HiC_scaffold_4        | 16057698        | FDR                 | C          | A          | intergenic                    | CBRO_00012386-CBRO_00012387                            | CCND2-Mlycd               |
| HiC_scaffold_4        | 29273446        | FDR                 | T          | C          | synonymous                    | CBRO_00012620                                          | CKAP5                     |
| HiC_scaffold_4        | 29273458        | FDR                 | C          | T          | synonymous                    | CBRO_00012620                                          | CKAP5                     |
| HiC_scaffold_5        | 18259775        | FDR                 | C          | A          | upstream; intergenic          | CBRO_00001229; CBRO_00001229-<br>CBRO_00001230         | AP1S2; AP1S2-phka2        |
| <i>HiC_scaffold_5</i> | <i>18306419</i> | <i>FDR</i>          | <i>C</i>   | <i>G</i>   | <i>upstream; intergenic</i>   | <i>CBRO_00001232; CBRO_00001231-<br/>CBRO_00001232</i> | <i>xlrs1; PPEF2-xlrs1</i> |
| <i>HiC_scaffold_5</i> | <i>18306428</i> | <i>FDR</i>          | <i>A</i>   | <i>T</i>   | <i>upstream; intergenic</i>   | <i>CBRO_00001232</i>                                   | <i>xlrs1; PPEF2-xlrs1</i> |
| <i>HiC_scaffold_5</i> | <i>18307019</i> | <i>FDR</i>          | <i>G</i>   | <i>T</i>   | <i>intronic</i>               | <i>CBRO_00001232</i>                                   | <i>xlrs1</i>              |
| <i>HiC_scaffold_5</i> | <i>18307030</i> | <i>FDR</i>          | <i>G</i>   | <i>A</i>   | <i>intronic</i>               | <i>CBRO_00001232</i>                                   | <i>xlrs1</i>              |
| HiC_scaffold_5        | 36619253        | FDR                 | T          | C          | intergenic                    | CBRO_00001583-CBRO_00001584                            | Chst12-ZDHHC13            |
| <i>HiC_scaffold_7</i> | <i>13815058</i> | <i>FDR</i>          | <i>A</i>   | <i>G</i>   | <i>synonymous; downstream</i> | <i>CBRO_00009805; CBRO_00009804</i>                    | <i>Aloxe3; UNKNOWN</i>    |
| HiC_scaffold_7        | 13823565        | FDR                 | T          | C          | intronic                      | CBRO_00009806                                          | Fbxo30                    |
| HiC_scaffold_7        | 13824467        | FDR                 | A          | G          | missense                      | CBRO_00009806                                          | Fbxo30                    |
| HiC_scaffold_7        | 19371997        | FDR                 | C          | T          | upstream; intergenic          | CBRO_00009922; CBRO_00009921-<br>CBRO_00009922         | ELOVL4; TENT5A-ELOVL4     |
| HiC_scaffold_7        | 19372002        | FDR                 | T          | G          | upstream; intergenic          | CBRO_00009922; CBRO_00009921-<br>CBRO_00009922         | ELOVL4; TENT5A-ELOVL4     |
| HiC_scaffold_8        | 20265076        | FDR                 | T          | C          | upstream; intergenic          | CBRO_00010647; CBRO_00010647-<br>CBRO_00010648         | Srcin1; Srcin1-Srcin1     |
| HiC_scaffold_8        | 20265098        | FDR                 | G          | C          | upstream; intergenic          | CBRO_00010647; CBRO_00010647-<br>CBRO_00010648         | Srcin1; Srcin1-Srcin1     |
| HiC_scaffold_8        | 20278571        | FDR                 | G          | A          | intergenic                    | CBRO_00010647-CBRO_00010648                            | Srcin1-Srcin1             |
| HiC_scaffold_9        | 15585466        | FDR                 | C          | G          | missense                      | CBRO_00004552                                          | Tmem260                   |
| HiC_scaffold_9        | 18453213        | FDR                 | A          | G          | intergenic                    | CBRO_00004639-CBRO_00004640                            | Bub1b-PAK6                |
| HiC_scaffold_9        | 28127377        | FDR                 | C          | T          | intergenic                    | CBRO_00004857-CBRO_00004858                            | METTL21E-RASA3            |
| HiC_scaffold_10       | 193812          | FDR                 | C          | G          | intergenic                    | CBRO_00018931-CBRO_00018932                            | Spsb4-UNKNOWN             |

*Hybridization alters the fitness landscape*

|                        |                 |                   |          |          |                        |                                                |                        |
|------------------------|-----------------|-------------------|----------|----------|------------------------|------------------------------------------------|------------------------|
| HiC_scaffold_11        | 25632195        | FDR               | C        | T        | intergenic             | CBRO_00013717-CBRO_00013718                    | CDH10-Cdh6             |
| HiC_scaffold_11        | 25632258        | FDR               | C        | T        | intergenic             | CBRO_00013717-CBRO_00013718                    | CDH10-Cdh6             |
| HiC_scaffold_11        | 25632641        | FDR               | A        | G        | intergenic             | CBRO_00013717-CBRO_00013718                    | CDH10-Cdh6             |
| HiC_scaffold_14        | 14624430        | FDR               | T        | C        | intergenic             | CBRO_00014084-CBRO_00014085                    | KDM6B-FGF11            |
| HiC_scaffold_18        | 26970449        | FDR               | C        | T        | intronic               | CBRO_00013239                                  | CSAD                   |
| <i>HiC_scaffold_27</i> | <i>8137335</i>  | <i>FDR</i>        | <i>G</i> | <i>T</i> | <i>intronic</i>        | <i>CBRO_00005998</i>                           | <i>SMARCA4</i>         |
| HiC_scaffold_27        | 21919164        | FDR               | G        | T        | synonymous             | CBRO_00006396                                  | SSTR2                  |
| HiC_scaffold_29        | 2136546         | FDR               | A        | T        | upstream; intergenic   | CBRO_00016347; CBRO_00016347-<br>CBRO_00016348 | RAPGEF6; RAPGEF6-ACSL6 |
| HiC_scaffold_29        | 2147361         | FDR               | C        | T        | intergenic             | CBRO_00016347-CBRO_00016348                    | RAPGEF6-ACSL6          |
| HiC_scaffold_31        | 6226140         | FDR               | A        | C        | intronic               | CBRO_00017224                                  | ranbp9                 |
| HiC_scaffold_34        | 7439419         | FDR               | G        | T        | intergenic             | CBRO_00001828-CBRO_00001829                    | rnf152-CAMTA1          |
| HiC_scaffold_34        | 30571660        | FDR               | C        | A        | intronic               | CBRO_00002374                                  | SHMT2                  |
| HiC_scaffold_40        | 4693917         | FDR               | G        | A        | intronic               | CBRO_00016589                                  | SLC37A1                |
| HiC_scaffold_40        | 4694015         | FDR               | T        | C        | synonymous             | CBRO_00016589                                  | SLC37A1                |
| HiC_scaffold_40        | 4723358         | FDR               | A        | G        | intronic               | CBRO_00016591                                  | UBXN4                  |
| HiC_scaffold_40        | 4732538         | FDR               | T        | C        | intronic               | CBRO_00016591                                  | UBXN4                  |
| HiC_scaffold_40        | 4734825         | FDR               | G        | T        | intronic               | CBRO_00016591                                  | UBXN4                  |
| HiC_scaffold_40        | 4780518         | FDR               | G        | C        | intronic               | CBRO_00016592                                  | ITGB2                  |
| HiC_scaffold_40        | 5016538         | FDR               | C        | A        | upstream; intergenic   | CBRO_00016599; CBRO_00016599-<br>CBRO_00016600 | RRP1B; RRP1B-ITGB2     |
| HiC_scaffold_43        | 26869231        | FDR               | C        | G        | synonymous             | CBRO_00008677                                  | lrpprc                 |
| HiC_scaffold_43        | 27800569        | FDR               | C        | T        | downstream; intergenic | CBRO_00008685; CBRO_00008685-<br>CBRO_00008686 | timp3; timp3-ETV6      |
| HiC_scaffold_44        | 19344526        | FDR               | C        | T        | intergenic             | CBRO_00007178-CBRO_00007179                    | ATP11C-sox3            |
| HiC_scaffold_46        | 16495639        | FDR               | G        | A        | intronic               | CBRO_00007743                                  | PHLPP1                 |
| HiC_scaffold_46        | 16510323        | FDR               | G        | A        | intronic               | CBRO_00007743                                  | PHLPP1                 |
| HiC_scaffold_46        | 16512668        | FDR               | T        | A        | intronic               | CBRO_00007743                                  | PHLPP1                 |
| <b>HiC_scaffold_46</b> | <b>16512886</b> | <b>Bonferroni</b> | <b>T</b> | <b>A</b> | <b>intronic</b>        | <b>CBRO_00007743</b>                           | <b>PHLPP1</b>          |
| HiC_scaffold_46        | 16513809        | FDR               | T        | C        | synonymous             | CBRO_00007743                                  | PHLPP1                 |
| HiC_scaffold_52        | 19031083        | FDR               | T        | A        | intergenic             | CBRO_00011872-CBRO_00011873                    | NRP2-MREG              |

*Hybridization alters the fitness landscape*

|                          |              |                   |          |          |                      |                                      |                          |
|--------------------------|--------------|-------------------|----------|----------|----------------------|--------------------------------------|--------------------------|
| HiC_scaffold_52          | 19031216     | FDR               | A        | T        | intergenic           | CBRO_00011872-CBRO_00011873          | NRP2-MREG                |
| <b>HiC_scaffold_1848</b> | <b>40119</b> | <b>Bonferroni</b> | <b>C</b> | <b>A</b> | <b>intergenic</b>    | .                                    | .                        |
| <b>HiC_scaffold_1848</b> | <b>40465</b> | <b>Bonferroni</b> | <b>T</b> | <b>A</b> | <b>intergenic</b>    | .                                    | .                        |
| HiC_scaffold_1848        | 40590        | FDR               | T        | C        | intergenic           | .                                    | .                        |
| HiC_scaffold_1848        | 40877        | FDR               | T        | C        | intergenic           | .                                    | .                        |
| HiC_scaffold_1848        | 41351        | FDR               | T        | C        | intergenic           | .                                    | .                        |
| <b>HiC_scaffold_7644</b> | <b>5971</b>  | <b>Bonferroni</b> | <b>T</b> | <b>G</b> | <b>intergenic</b>    | .                                    | .                        |
| HiC_scaffold_12681       | 4019         | FDR               | T        | C        | upstream; intergenic | CBRO_00022068; CBRO_00022068-CHR_END | UNKNOWN; UNKNOWN-CHR_END |



**Appendix 1—Table 9. Gene ontology term enrichment for genes associated with growth.**

| Functional Category                                                             | Enrichment FDR | Genes in list | Total genes | Genes                                                                                                                      |
|---------------------------------------------------------------------------------|----------------|---------------|-------------|----------------------------------------------------------------------------------------------------------------------------|
| Negative regulation of intracellular signal transduction                        | 0.0259         | 6             | 537         | PPEF2, RNF152, RASA3, RANBP9, PHLPP1, TIMP3                                                                                |
| Phosphorus metabolic process                                                    | 0.0259         | 17            | 3597        | PHLPP1, CCND2, PAK6, PPEF2, SHMT2, MLYCD, RRP1B, ITGB2, SRCIN1, PHKA2, ELOVL4, BUB1B, RANBP9, TIMP3, CAMTA1, ACSL6, RASA3  |
| Phosphate-containing compound metabolic process                                 | 0.0259         | 17            | 3570        | PHLPP1, CCND2, PAK6, PPEF2, SHMT2, MLYCD, RRP1B, ITGB2, SRCIN1, PHKA2, ELOVL4, BUB1B, RANBP9, TIMP3, CAMTA1, ACSL6, RASA3  |
| Serine family amino acid catabolic process                                      | 0.0259         | 2             | 17          | SHMT2, CSAD                                                                                                                |
| Organic acid biosynthetic process                                               | 0.0259         | 6             | 466         | ELOVL4, SHMT2, MLYCD, CHST12, ALOXE3, CSAD                                                                                 |
| Regulation of phosphate metabolic process                                       | 0.0259         | 11            | 1870        | PHLPP1, CCND2, PAK6, PPEF2, SHMT2, RRP1B, ITGB2, SRCIN1, RANBP9, TIMP3, CAMTA1                                             |
| Nucleoside bisphosphate biosynthetic process                                    | 0.0259         | 3             | 82          | MLYCD, ELOVL4, ACSL6                                                                                                       |
| Ribonucleoside bisphosphate biosynthetic process                                | 0.0259         | 3             | 82          | MLYCD, ELOVL4, ACSL6                                                                                                       |
| Purine nucleoside bisphosphate biosynthetic process                             | 0.0259         | 3             | 82          | MLYCD, ELOVL4, ACSL6                                                                                                       |
| Long-chain fatty-acyl-CoA biosynthetic process                                  | 0.0259         | 2             | 19          | ELOVL4, ACSL6                                                                                                              |
| Thioester biosynthetic process                                                  | 0.0259         | 3             | 66          | MLYCD, ELOVL4, ACSL6                                                                                                       |
| Positive regulation by host of viral transcription                              | 0.0259         | 2             | 18          | SMARCA4, RRP1B                                                                                                             |
| Sulfur compound biosynthetic process                                            | 0.0259         | 5             | 207         | MLYCD, CHST12, ELOVL4, CSAD, ACSL6                                                                                         |
| Regulation of phosphorus metabolic process                                      | 0.0259         | 11            | 1872        | PHLPP1, CCND2, PAK6, PPEF2, SHMT2, RRP1B, ITGB2, SRCIN1, RANBP9, TIMP3, CAMTA1                                             |
| Acyl-CoA biosynthetic process                                                   | 0.0259         | 3             | 66          | MLYCD, ELOVL4, ACSL6                                                                                                       |
| Hypothalamus development                                                        | 0.0291         | 2             | 22          | NRP2, SOX3                                                                                                                 |
| Sulfur compound metabolic process                                               | 0.0312         | 5             | 393         | MLYCD, CHST12, ELOVL4, CSAD, ACSL6                                                                                         |
| Long-chain fatty-acyl-CoA metabolic process                                     | 0.0343         | 2             | 26          | ELOVL4, ACSL6                                                                                                              |
| Regulation of mitochondrial translation                                         | 0.0343         | 2             | 26          | LRPPRC, SHMT2                                                                                                              |
| Limbic system development                                                       | 0.0405         | 3             | 115         | NRP2, KDM6B, SOX3                                                                                                          |
| Acyl-CoA metabolic process                                                      | 0.0406         | 3             | 119         | MLYCD, ELOVL4, ACSL6                                                                                                       |
| Thioester metabolic process                                                     | 0.0406         | 3             | 119         | MLYCD, ELOVL4, ACSL6                                                                                                       |
| Protein phosphorylation                                                         | 0.0412         | 11            | 2093        | PHLPP1, CCND2, PAK6, PPEF2, ITGB2, SRCIN1, PHKA2, BUB1B, RANBP9, TIMP3, RASA3                                              |
| Modulation by host of viral transcription                                       | 0.0412         | 2             | 33          | SMARCA4, RRP1B                                                                                                             |
| Carboxylic acid biosynthetic process                                            | 0.0412         | 5             | 465         | ELOVL4, SHMT2, MLYCD, CHST12, ALOXE3                                                                                       |
| Modulation of transcription in other organism involved in symbiotic interaction | 0.0412         | 2             | 34          | SMARCA4, RRP1B                                                                                                             |
| Modulation by host of symbiont transcription                                    | 0.0412         | 2             | 33          | SMARCA4, RRP1B                                                                                                             |
| Cellular protein modification process                                           | 0.0495         | 17            | 4434        | PHLPP1, CCND2, PAK6, PPEF2, RNF152, ITGB2, SPSB4, SRCIN1, PHKA2, FBXO30, KDM6B, BUB1B, RANBP9, TIMP3, CAMTA1, SHMT2, RASA3 |
| Protein modification process                                                    | 0.0495         | 17            | 4434        | PHLPP1, CCND2, PAK6, PPEF2, RNF152, ITGB2, SPSB4, SRCIN1, PHKA2, FBXO30, KDM6B, BUB1B, RANBP9, TIMP3, CAMTA1, SHMT2, RASA3 |

**Appendix 1—Table 10. List of the 31 morphological traits measured for this study, and standard length; corresponding landmark ID’s match those shown in Figure 2—figure supplement 3.**

| <b>Trait Index</b> | <b>Trait Description</b>      | <b>Trait Shorthand</b> | <b>Points</b> |
|--------------------|-------------------------------|------------------------|---------------|
| 1                  | Nasal protrusion              | nose                   | 3-4           |
| 2                  | Nasal length                  | foresnout              | 2-5           |
| 3                  | Orbit to anal fin insertion   | bellylen               | 6-15          |
| 4                  | Lateral facial length         | snoutlen               | 2-6           |
| 5                  | Upper jaw to pectoral girdle  | jaw2pect               | 2-14          |
| 6                  | Lateral skull length          | pmx2add                | 2-11          |
| 7                  | Premaxilla length             | pmxlen                 | 2-9           |
| 8                  | Lower mandible length         | jawlen                 | 1-9           |
| 9                  | Jaw joint to orbit            | foreeyewidth           | 6-9           |
| 10                 | Horizontal orbit diameter     | eyewidth               | 6-8           |
| 11                 | Vertical orbit diameter       | eyeht                  | 7-10          |
| 12                 | Head height                   | headht                 | 7-9           |
| 13                 | Suspensorium length           | suspensorium           | 9-11          |
| 14                 | Adductor height               | adductorht             | 11-12         |
| 15                 | Subopercle to pectoral girdle | ad2pect                | 11-14         |
| 16                 | Pectoral fin insertion width  | pectinsertion          | 13-14         |
| 17                 | Anal to caudal distance       | analtocaudal           | 15-16         |
| 18                 | Caudal peduncle height        | caudalpedht            | 16-18         |
| 19                 | Dorsal to caudal distance     | dorsaltocaudal         | 18-19         |
| 20                 | Body depth                    | bodydepth              | 15-19         |
| 21                 | Nasal protrusion angle        | nasalangle             | 7-5-3         |
| 22                 | Premaxilla to orbit angle     | topeyeangle            | 7-2-10        |
| 23                 | Premaxilla to adductor angle  | lowereyeangle          | 7-2-11        |
| 24                 | Dorsal facial length          | dorsalsnoutlen         | 23-24, 25-26  |
| 25                 | Adductor to premaxilla        | eyetosnout             | 21-24, 25-28  |
| 26                 | Neurocranium to premaxilla    | headlen                | 24-20, 25-29  |
| 27                 | Orbit to premaxilla           | innereyetosnout        | 22-24, 25-27  |
| 28                 | Interorbital width            | cranialwidth           | 22-27         |
| 29                 | Orbital neurocranium width    | hindeyewidth           | 21-28         |
| 30                 | Max. neurocranium width       | headwidth              | 20-29         |
| 31                 | Standard length (SL)          | SL                     | 2-17          |

**Appendix 1—Table 11. Generalized additive models fitted to composite fitness.** Model fit was assessed using AICc, and Akaike Weights represent proportional model support. A thin plate spline for the two linear discriminant axes  $s(LD1, LD2)$  is always included, as is a fixed effect of either experiment (i.e. Martin & Wainwright 2013, Martin and Gould 2020) or Lake (Crescent Pond/Little Lake) or an interaction between the two. In the last two models, Experiment and Lake are included as splines, modeled using a factor smooth (bs = “fs”). The best fit model had 5 estimated degrees of freedom.

| <b>Model</b>                                                                                     | <b>AICc</b> | <b><math>\Delta</math>AICc</b> | <b>Akaike Weights</b> |
|--------------------------------------------------------------------------------------------------|-------------|--------------------------------|-----------------------|
| <i>Composite</i> ~ $s(LD1, LD2) + Experiment + Lake$                                             | 99.114      | 0.000                          | 0.825                 |
| Composite ~ $s(LD1, LD2) + Experiment * Lake$                                                    | 102.210     | 3.096                          | 0.175                 |
| Composite ~ $s(LD1, LD2) + s(LD1) + s(LD2) + Experiment + Lake$                                  | 131.456     | 32.342                         | < 0.001               |
| Composite ~ $s(LD1, LD2) + s(LD1) + s(LD2) + Experiment * Lake$                                  | 135.894     | 36.781                         | < 0.001               |
| Composite ~ $s(LD1, LD2) + s(LD1, Experiment, bs = "fs") + s(LD2, Experiment, bs = "fs") + Lake$ | 230.428     | 131.314                        | < 0.001               |
| Composite ~ $s(LD1, LD2) + s(LD1, Lake, bs = "fs") + s(LD2, Lake, bs = "fs") + Experiment$       | 230.868     | 131.754                        | < 0.001               |

**Appendix 1—Table 12.**

**Generalized additive models fitted to growth.** Model fit was assessed using AICc, and Akaike Weights represent proportional model support. A thin plate spline for the two linear discriminant axes  $s(\text{LD1}, \text{LD2})$  is always included, as is a fixed effect of either experiment (i.e. Martin & Wainwright 2013, Martin and Gould 2020) or Lake (Crescent Pond/Little Lake) or an interaction between the two. In the last two models, Experiment and Lake are included as splines, modeled using a factor smooth ( $bs = \text{"fs"}$ ). The best fit model had 8.93 estimated degrees of freedom.

| <b>Model</b>                                                                                                                                                        | <b>AICc</b> | <b><math>\Delta\text{AICc}</math></b> | <b>Akaike Weights</b> |
|---------------------------------------------------------------------------------------------------------------------------------------------------------------------|-------------|---------------------------------------|-----------------------|
| <i>Growth</i> ~ $s(\text{LD1}, \text{LD2}) + \text{Experiment} * \text{Lake}$                                                                                       | -44.658     | 0.000                                 | 1                     |
| <i>Growth</i> ~ $s(\text{LD1}, \text{LD2}) + \text{Experiment} + \text{Lake}$                                                                                       | 3.904       | 48.562                                | < 0.001               |
| <i>Growth</i> ~ $s(\text{LD1}, \text{LD2}) + s(\text{LD1}) + s(\text{LD2}) + \text{Experiment} * \text{Lake}$                                                       | 46.249      | 90.907                                | < 0.001               |
| <i>Growth</i> ~ $s(\text{LD1}, \text{LD2}) + s(\text{LD1}) + s(\text{LD2}) + \text{Experiment} + \text{Lake}$                                                       | 89.121      | 133.779                               | < 0.001               |
| <i>Growth</i> ~ $s(\text{LD1}, \text{LD2}) + s(\text{LD1}, \text{Lake}, bs = \text{"fs"}) + s(\text{LD2}, \text{Lake}, bs = \text{"fs"}) + \text{Experiment}$       | 690.379     | 735.038                               | < 0.001               |
| <i>Growth</i> ~ $s(\text{LD1}, \text{LD2}) + s(\text{LD1}, \text{Experiment}, bs = \text{"fs"}) + s(\text{LD2}, \text{Experiment}, bs = \text{"fs"}) + \text{Lake}$ | 693.748     | 738.406                               | < 0.001               |

**Appendix 1—Table 13. Generalized additive models fitted to survival.** Model fit was assessed using AICc, and Akaike Weights represent proportional model support. A thin plate spline for the two linear discriminant axes  $s(LD1, LD2)$  is always included, as is a fixed effect of either experiment (i.e. Martin & Wainwright 2013, Martin and Gould 2020) or Lake (Crescent Pond/Little Lake) or an interaction between the two. In the last two models, Experiment and Lake are included as splines, modeled using a factor smooth (bs = “fs”). The best fit model had 5 estimated degrees of freedom.

| <b>Model</b>                                                                                           | <b>AICc</b> | <b><math>\Delta</math>AICc</b> | <b>Akaike Weights</b> |
|--------------------------------------------------------------------------------------------------------|-------------|--------------------------------|-----------------------|
| <i>Survival</i> ~ $s(LD1, LD2) + Experiment + Lake$                                                    | 141.057     | 0.000                          | 0.849                 |
| <i>Survival</i> ~ $s(LD1, LD2) + Experiment * Lake$                                                    | 144.504     | 3.447                          | 0.151                 |
| <i>Survival</i> ~ $s(LD1, LD2) + s(LD1) + s(LD2) + Experiment + Lake$                                  | 173.399     | 32.342                         | < 0.001               |
| <i>Survival</i> ~ $s(LD1, LD2) + s(LD1) + s(LD2) + Experiment * Lake$                                  | 178.189     | 37.132                         | < 0.001               |
| <i>Survival</i> ~ $s(LD1, LD2) + s(LD1, Experiment, bs = "fs") + s(LD2, Experiment, bs = "fs") + Lake$ | 273.547     | 132.490                        | < 0.001               |
| <i>Survival</i> ~ $s(LD1, LD2) + s(LD1, Lake, bs = "fs") + s(LD2, Lake, bs = "fs") + Experiment$       | 273.694     | 132.637                        | < 0.001               |

**Appendix 1—Table 14. Generalized additive models fitted to growth including SNPs most strongly associated with composite fitness.** Model fit was assessed using AICc, and Akaike Weights represent proportional model support. The best fit model for composite fitness using morphology alone (see Table 8) was used as the base model. The SNPs that were most strongly associated with composite fitness (following a Bonferroni correction) were included as fixed effects, modeled as splines using a factor smooth, treating genotype as an ordered factor. Note that three SNPs were excluded due to their close proximity to other SNPs that were more strongly associated. All SNPs were considered individually, as well as all SNPs together. We were unable to assess all possible combinations of SNPs due to the vast number of potential models given the number of SNPs under consideration; rather, we fit one final model that only included SNPs found to be significant in the full model. In turn this model led to a substantial improvement in AICc. The best fit model had 20.29 estimated degrees of freedom.

| Model                                                                                                                                                                                                                                                         | AICc   | ΔAICc  | Akaike Weights |
|---------------------------------------------------------------------------------------------------------------------------------------------------------------------------------------------------------------------------------------------------------------|--------|--------|----------------|
| <i>Composite Fitness</i> ~ <i>s(LD1, LD2)</i> + <i>Experiment</i> + <i>Lake</i> + <i>s(Site1)</i> + <i>s(Site2)</i> + <i>s(Site6)</i> + <i>s(Site7)</i> + <i>s(Site8)</i> + <i>s(Site9)</i> + <i>s(Site10)</i>                                                | 4.586  | 0.000  | 0.999          |
| Composite Fitness ~ <i>s(LD1, LD2)</i> + <i>Experiment</i> + <i>Lake</i> + <i>s(Site1)</i> + <i>s(Site2)</i> + <i>s(Site3)</i> + <i>s(Site4)</i> + <i>s(Site5)</i> + <i>s(Site6)</i> + <i>s(Site7)</i> + <i>s(Site8)</i> + <i>s(Site9)</i> + <i>s(Site10)</i> | 40.876 | 36.290 | < 0.001        |
| Composite Fitness ~ <i>s(LD1, LD2)</i> + <i>Experiment</i> + <i>Lake</i> + <i>s(Site3)</i>                                                                                                                                                                    | 55.588 | 51.001 | < 0.001        |
| Composite Fitness ~ <i>s(LD1, LD2)</i> + <i>Experiment</i> + <i>Lake</i> + <i>s(Site7)</i>                                                                                                                                                                    | 58.386 | 53.800 | < 0.001        |
| Composite Fitness ~ <i>s(LD1, LD2)</i> + <i>Experiment</i> + <i>Lake</i> + <i>s(Site4)</i>                                                                                                                                                                    | 65.453 | 60.867 | < 0.001        |
| Composite Fitness ~ <i>s(LD1, LD2)</i> + <i>Experiment</i> + <i>Lake</i> + <i>s(Site2)</i>                                                                                                                                                                    | 71.245 | 66.658 | < 0.001        |
| Composite Fitness ~ <i>s(LD1, LD2)</i> + <i>Experiment</i> + <i>Lake</i> + <i>s(Site5)</i>                                                                                                                                                                    | 72.329 | 67.743 | < 0.001        |
| Composite Fitness ~ <i>s(LD1, LD2)</i> + <i>Experiment</i> + <i>Lake</i> + <i>s(Site1)</i>                                                                                                                                                                    | 73.671 | 69.085 | < 0.001        |
| Composite Fitness ~ <i>s(LD1, LD2)</i> + <i>Experiment</i> + <i>Lake</i> + <i>s(Site8)</i>                                                                                                                                                                    | 74.413 | 69.827 | < 0.001        |
| Composite Fitness ~ <i>s(LD1, LD2)</i> + <i>Experiment</i> + <i>Lake</i> + <i>s(Site9)</i>                                                                                                                                                                    | 74.680 | 70.094 | < 0.001        |
| Composite Fitness ~ <i>s(LD1, LD2)</i> + <i>Experiment</i> + <i>Lake</i> + <i>s(Site10)</i>                                                                                                                                                                   | 88.977 | 84.391 | < 0.001        |
| Composite Fitness ~ <i>s(LD1, LD2)</i> + <i>Experiment</i> + <i>Lake</i> + <i>s(Site6)</i>                                                                                                                                                                    | 90.427 | 85.841 | < 0.001        |
| Composite Fitness ~ <i>s(LD1, LD2)</i> + <i>Experiment</i> + <i>Lake</i>                                                                                                                                                                                      | 99.114 | 94.527 | < 0.001        |

Note: Site1 = HiC\_Scaffold\_1:43866598, Site2 = HiC\_Scaffold\_53:11317840, Site3 = HiC\_Scaffold\_46:35151009, Site4 = HiC\_Scaffold\_8:20263964, Site5 = 37:18591438, Site5 = HiC\_Scaffold\_37:18591438, Site6 = HiC\_Scaffold\_24:15964553, Site7 = HiC\_Scaffold\_1848:40590, Site8 = HiC\_Scaffold\_4461:12939, Site9 = HiC\_Scaffold\_12778:1456, Site10 = HiC\_Scaffold\_18999:1084.

**Appendix 1—Table 15. Generalized additive models fitted to growth including SNPs most strongly associated with growth.**

Model fit was assessed using AICc, and Akaike Weights represent proportional model support. The best fit model for growth using morphology alone (see Table 9) was used as the base model. Each of the four SNPs that were most strongly associated with growth (following a Bonferroni correction) were included as fixed effects, modeled as splines using a factor smooth, treating genotype as an ordered factor. All SNPs were considered individually, as well as all possible combinations. This was only feasible due to the small number of SNPs assessed (four). The best fit model had 7.97 estimated degrees of freedom.

| Model                                                                                | AICc    | ΔAICc  | Akaike Weights |
|--------------------------------------------------------------------------------------|---------|--------|----------------|
| Growth ~ s(LD1, LD2) + Experiment * Lake + s(Site3) + s(Site4)                       | -67.649 | 0.000  | 0.490          |
| Growth ~ s(LD1, LD2) + Experiment * Lake + s(Site3)                                  | -65.634 | 2.015  | 0.179          |
| Growth ~ s(LD1, LD2) + Experiment * Lake + s(Site1)                                  | -64.161 | 3.488  | 0.086          |
| Growth ~ s(LD1, LD2) + Experiment * Lake + s(Site1) + s(Site3)                       | -63.926 | 3.723  | 0.076          |
| Growth ~ s(LD1, LD2) + Experiment * Lake + s(Site1) + s(Site2)                       | -63.861 | 3.788  | 0.074          |
| Growth ~ s(LD1, LD2) + Experiment * Lake + s(Site2) + s(Site4)                       | -63.503 | 4.146  | 0.062          |
| Growth ~ s(LD1, LD2) + Experiment * Lake + s(Site2)                                  | -61.849 | 5.800  | 0.027          |
| Growth ~ s(LD1, LD2) + Experiment * Lake + s(Site1) + s(Site4)                       | -58.044 | 9.604  | 0.004          |
| Growth ~ s(LD1, LD2) + Experiment * Lake + s(Site4)                                  | -56.068 | 11.581 | 0.001          |
| Growth ~ s(LD1, LD2) + Experiment * Lake + s(Site1) + s(Site3) + s(Site4)            | -54.878 | 12.770 | < 0.001        |
| Growth ~ s(LD1, LD2) + Experiment * Lake + s(Site1) + s(Site2) + s(Site4)            | -54.509 | 13.140 | < 0.001        |
| Growth ~ s(LD1, LD2) + Experiment * Lake + s(Site2) + s(Site3)                       | -47.602 | 20.047 | < 0.001        |
| Growth ~ s(LD1, LD2) + Experiment * Lake                                             | -44.658 | 22.990 | < 0.001        |
| Growth ~ s(LD1, LD2) + Experiment * Lake + s(Site1) + s(Site2) + s(Site3)            | -41.689 | 25.960 | < 0.001        |
| Growth ~ s(LD1, LD2) + Experiment * Lake + s(Site1) + s(Site2) + s(Site3) + s(Site4) | -29.801 | 37.847 | < 0.001        |

Note: Site1 = HiC\_Scaffold\_46:16512886, Site2 = HiC\_Scaffold\_1848:40119, Site3 = HiC\_Scaffold\_1848:40465, Site4 = HiC\_Scaffold\_7644:5971

**Appendix 1—Table 16. General linear models fitted to examine the relationship between aspects of network size (i.e. number of nodes, number of edges linking neighboring nodes) and the number of accessible paths between generalists and specialists.** Models were fitted using each of the three different fitness measures; bolded lines correspond to the best-fit model for each response variable, within each measure of fitness. Poisson regression was chosen as each response variable correspond to count-data. Because Poisson regression models are log-linear, we report both the estimated coefficient, as well as it's exponentiated value which corresponds to the expected multiplicative increase in the mean of Y per unit-value of X.

| Fitness Measure                                      | Model                                                       | Family         | AIC             | Coefficient   | exp(Coefficient) | P-value            |
|------------------------------------------------------|-------------------------------------------------------------|----------------|-----------------|---------------|------------------|--------------------|
| <b>Composite</b>                                     | # Edges in Network ~ # Nodes in Network                     | Poisson        | 34260.63        | 0.0342        | 1.0348           | < 0.0001           |
|                                                      | # Edges in Network ~ # Nodes in Network + Trajectory        | Poisson        | 34260.93        | 0.0344        | 1.0350           | < 0.0001           |
|                                                      | <b># Edges in Network ~ # Nodes in Network * Trajectory</b> | <b>Poisson</b> | <b>33599.17</b> | <b>0.0386</b> | <b>1.0394</b>    | <b>&lt; 0.0001</b> |
|                                                      | # Accessible Paths ~ # Nodes In Network                     | Poisson        | 12207.29        | 0.0082        | 1.0083           | < 0.0001           |
|                                                      | <b># Accessible Paths ~ # Nodes In Network + Trajectory</b> | <b>Poisson</b> | <b>12203.83</b> | <b>0.0061</b> | <b>1.0062</b>    | <b>&lt; 0.0001</b> |
|                                                      | # Accessible Paths ~ # Nodes In Network * Trajectory        | Poisson        | 12204.89        | 0.0071        | 1.0071           | < 0.0001           |
|                                                      | # Accessible Paths ~ # Edges In Network                     | Poisson        | 12203.07        | 0.0044        | 1.0044           | < 0.0001           |
|                                                      | <b># Accessible Paths ~ # Edges In Network + Trajectory</b> | <b>Poisson</b> | <b>12200.31</b> | <b>0.0034</b> | <b>1.0034</b>    | <b>&lt; 0.0001</b> |
| # Accessible Paths ~ # Edges In Network * Trajectory | Poisson                                                     | 12201.69       | 0.0039          | 1.0039        | < 0.0001         |                    |
| <b>Growth</b>                                        | # Edges in Network ~ # Nodes in Network                     | Poisson        | 26739.96        | 0.0478        | 1.0489           | < 0.0001           |
|                                                      | # Edges in Network ~ # Nodes in Network + Trajectory        | Poisson        | 26711.02        | 0.0489        | 1.0501           | < 0.0001           |
|                                                      | <b># Edges in Network ~ # Nodes in Network * Trajectory</b> | <b>Poisson</b> | <b>26507.72</b> | <b>0.0532</b> | <b>1.0546</b>    | <b>&lt; 0.0001</b> |
|                                                      | # Accessible Paths ~ # Nodes In Network                     | Poisson        | 10162.51        | 0.0106        | 1.0107           | < 0.0001           |
|                                                      | <b># Accessible Paths ~ # Nodes In Network + Trajectory</b> | <b>Poisson</b> | <b>10160.39</b> | <b>0.0083</b> | <b>1.0083</b>    | <b>0.0002</b>      |
|                                                      | # Accessible Paths ~ # Nodes In Network * Trajectory        | Poisson        | 10162.28        | 0.0088        | 1.0089           | 0.0011             |
|                                                      | # Accessible Paths ~ # Edges In Network                     | Poisson        | 10159.39        | 0.0062        | 1.0062           | < 0.0001           |
|                                                      | <b># Accessible Paths ~ # Edges In Network + Trajectory</b> | <b>Poisson</b> | <b>10157.09</b> | <b>0.0050</b> | <b>1.0050</b>    | <b>&lt; 0.0001</b> |
| # Accessible Paths ~ # Edges In Network * Trajectory | Poisson                                                     | 10159.09       | 0.0050          | 1.0050        | 0.0010           |                    |
| <b>Survival</b>                                      | # Edges in Network ~ # Nodes in Network                     | Poisson        | 32986.67        | 0.0346        | 1.0352           | < 0.0001           |
|                                                      | # Edges in Network ~ # Nodes in Network + Trajectory        | Poisson        | 32978.31        | 0.0350        | 1.0356           | < 0.0001           |
|                                                      | <b># Edges in Network ~ # Nodes in Network * Trajectory</b> | <b>Poisson</b> | <b>32437.55</b> | <b>0.0384</b> | <b>1.0392</b>    | <b>&lt; 0.0001</b> |
|                                                      | <b># Accessible Paths ~ # Nodes In Network</b>              | <b>Poisson</b> | <b>11725.19</b> | <b>0.0058</b> | <b>1.0058</b>    | <b>&lt; 0.0001</b> |
|                                                      | # Accessible Paths ~ # Nodes In Network + Trajectory        | Poisson        | 11727.13        | 0.0056        | 1.0056           | 0.0001             |
|                                                      | # Accessible Paths ~ # Nodes In Network * Trajectory        | Poisson        | 11727.11        | 0.0068        | 1.0068           | < 0.0001           |
|                                                      | <b># Accessible Paths ~ # Edges In Network</b>              | <b>Poisson</b> | <b>11722.24</b> | <b>0.0032</b> | <b>1.0032</b>    | <b>&lt; 0.0001</b> |
|                                                      | # Accessible Paths ~ # Edges In Network + Trajectory        | Poisson        | 11724.23        | 0.0031        | 1.0031           | < 0.0001           |
| # Accessible Paths ~ # Edges In Network * Trajectory | Poisson                                                     | 11725.27       | 0.0036          | 1.0036        | < 0.0001         |                    |



**Appendix 1—Table 17. Accessibility of specialists to generalists and the ruggedness of their respective fitness landscapes.** Odds ratios were obtained by modelling the association between each summary statistic and the species from which adaptive loci were used to construct the fitness network. Scale-eaters were treated as the baseline of comparison in the comparison of odds ratios; thus, positive odds ratios imply that summary statistics for molluscivore fitness networks are greater than those constructed from scale-eater adaptive loci and vice versa. For generalist to specialist comparisons, accessible paths were identified between one randomly sampled generalist node and one randomly sampled specialist node. For comparison of the peaks in networks, these summary statistics were calculated from either molluscivore or scale-eater fitness networks, identifying the number of peaks (nodes with no fitter neighbors – see Methods), and the scaled (total divided by number of nodes in the network) number of accessible paths separating all focal specialist nodes and all peaks in the network.

| Comparison                      | Summary Statistic                                         | Mean / SE                   | Mean / SE                  | Odds Ratio: (95% CI)              | LRT <i>P</i> -value |
|---------------------------------|-----------------------------------------------------------|-----------------------------|----------------------------|-----------------------------------|---------------------|
|                                 |                                                           | <i>Molluscivore Network</i> | <i>Scale-Eater Network</i> | <i>Molluscivore / Scale Eater</i> |                     |
|                                 | <i>Number of nodes in network</i>                         | 22.994 / 0.106              | 31.000 / 0.177             | 0.818: (0.807, 0.829)             | < 0.0001            |
| <b>Generalist to Specialist</b> | <i>Number of accessible paths</i>                         | 1.105 / 0.007               | 1.268 / 0.018              | 0.515: (0.449, 0.588)             | < 0.0001            |
|                                 | <i>Scaled number of accessible paths</i>                  | 0.051 / 0.001               | 0.042 / 0.001              | 2.095: (1.934, 2.274)             | < 0.0001            |
|                                 | <i>Length of shortest accessible path</i>                 | 2.410 / 0.012               | 3.444 / 0.029              | 0.253: (0.231, 0.277)             | < 0.0001            |
|                                 | <i>Number of peaks</i>                                    | 3.274 / 0.035               | 4.637 / 0.046              | 0.604: (0.575, 0.634)             | < 0.0001            |
| <b>Peaks in Network</b>         | <i>Scaled number of accessible paths to peaks</i>         | 0.095 / 0.001               | 0.087 / 0.001              | 1.514: (1.404, 1.635)             | < 0.0001            |
|                                 | <i>Length of shortest accessible path to nearest peak</i> | 0.823 / 0.022               | 1.482 / 0.029              | 0.539: (0.500, 0.579)             | < 0.0001            |

**Appendix 1—Table 18. Influence of different sources of adaptive genetic variation on accessibility of fitness paths separating either generalists from molluscivores, or generalists and scale-eaters using all samples.** Results for networks using all three measures of fitness (composite fitness, survival, and growth) are reported. Networks were constructed from random draws of five SNPs from either Standing genetic variation (SGV), introgression, or *de novo* mutations, as well as their combinations. Odds ratios were obtained by modelling the association between each accessibility measure and the source of genetic variation used to construct the fitness network, relative to networks constructed from standing variation. Thus, positive odds ratios imply that networks from standing variation have measures of accessibility that are smaller as compared to the alternative (e.g. introgression, *de novo* mutations, etc).

| Trajectory                              | Source                                  | Accessibility                           | Composite Fitness  |                       |                          | Growth                |                       |                         | Survival              |                       |                          |                       |                       |
|-----------------------------------------|-----------------------------------------|-----------------------------------------|--------------------|-----------------------|--------------------------|-----------------------|-----------------------|-------------------------|-----------------------|-----------------------|--------------------------|-----------------------|-----------------------|
|                                         |                                         |                                         | Mean / SE          | LRT P-value           | Odds Ratio: (95% CI)     | Mean / SE             | LRT P-value           | Odds Ratio: (95% CI)    | Mean / SE             | LRT P-value           | Odds Ratio: (95% CI)     |                       |                       |
| Generalist to Molluscivore              | Introgression                           | # Nodes in network                      | 22.095 / 0.118     | < 0.0001              | 0.627: (0.606, 0.646)    | 17.630 / 0.098        | < 0.0001              | 0.556: (0.535, 0.577)   | 21.845 / 0.108        | < 0.0001              | 0.628: (0.608, 0.646)    |                       |                       |
|                                         |                                         | # Accessible paths                      | 1.071 / 0.005      | < 0.0001              | 0.442: (0.378, 0.515)    | 1.099 / 0.007         | < 0.0001              | 0.721: (0.613, 0.842)   | 1.039 / 0.004         | < 0.0001              | 0.214: (0.174, 0.259)    |                       |                       |
|                                         |                                         | # Accessible paths / # nodes in network | 0.052 / 0.0004     | < 0.0001              | 17.131: (15.076, 19.556) | 0.066 / 0.0006        | < 0.0001              | 10.272: (9.105, 11.636) | 0.051 / 0.0003        | < 0.0001              | 11.256: (10.121, 12.560) |                       |                       |
|                                         |                                         | Length of shortest accessible path      | 2.480 / 0.013      | < 0.0001              | 0.768: (0.717, 0.823)    | 2.457 / 0.016         | 0.8826                | 0.994: (0.915, 1.079)   | 2.475 / 0.012         | < 0.0001              | 0.662: (0.619, 0.707)    |                       |                       |
|                                         |                                         | Ruggedness (# of peaks)                 | 1.444 / 0.025      | < 0.0001              | 0.250: (0.234, 0.268)    | 0.706 / 0.018         | < 0.0001              | 0.252: (0.233, 0.271)   | 1.863 / 0.033         | < 0.0001              | 0.397: (0.378, 0.416)    |                       |                       |
|                                         | SGV + Introgression                     | # Nodes in network                      | 32.167 / 0.146     | < 0.0001              | 0.820: (0.813, 0.827)    | 22.994 / 0.106        | < 0.0001              | 0.777: (0.768, 0.786)   | 32.386 / 0.144        | < 0.0001              | 0.826: (0.819, 0.833)    |                       |                       |
|                                         |                                         | # Accessible paths                      | 1.117 / 0.007      | < 0.0001              | 0.694: (0.624, 0.771)    | 1.105 / 0.006         | < 0.0001              | 0.773: (0.684, 0.873)   | 1.140 / 0.007         | < 0.0001              | 0.666: (0.608, 0.728)    |                       |                       |
|                                         |                                         | # Accessible paths / # nodes in network | 0.037 / 0.0002     | < 0.0001              | 3.974: (3.707, 4.266)    | 0.051 / 0.0003        | < 0.0001              | 3.538: (3.297, 3.802)   | 0.038 / 0.0003        | < 0.0001              | 3.108: (2.922, 3.309)    |                       |                       |
|                                         |                                         | Length of shortest accessible path      | 2.524 / 0.012      | < 0.0001              | 0.843: (0.793, 0.894)    | 2.410 / 0.011         | 0.0050                | 0.897: (0.835, 0.962)   | 2.573 / 0.012         | < 0.0001              | 0.798: (0.755, 0.843)    |                       |                       |
|                                         |                                         | Ruggedness (# of peaks)                 | 3.906 / 0.034      | < 0.0001              | 0.523: (0.509, 0.537)    | 2.218 / 0.028         | < 0.0001              | 0.556: (0.539, 0.574)   | 5.651 / 0.056         | < 0.0001              | 0.690: (0.680, 0.700)    |                       |                       |
|                                         |                                         | Generalist to Scale-eater               | Introgression      | # Nodes in network    | 45.783 / 0.261           | < 0.0001              | 0.866: (0.858, 0.874) | 33.569 / 0.232          | < 0.0001              | 0.838: (0.827, 0.849) | 45.423 / 0.270           | < 0.0001              | 0.870: (0.862, 0.879) |
|                                         |                                         |                                         |                    | # Accessible paths    | 1.190 / 0.012            | < 0.0001              | 0.632: (0.564, 0.706) | 1.178 / 0.013           | < 0.0001              | 0.637: (0.556, 0.728) | 1.191 / 0.012            | < 0.0001              | 0.668: (0.593, 0.751) |
| # Accessible paths / # nodes in network | 0.027 / 0.0003                          |                                         |                    | < 0.0001              | 1.790: (1.658, 1.936)    | 0.037 / 0.0004        | < 0.0001              | 2.011: (1.837, 2.206)   | 0.028 / 0.0003        | < 0.0001              | 1.931: (1.778, 2.101)    |                       |                       |
| Length of shortest accessible path      | 3.033 / 0.021                           |                                         |                    | < 0.0001              | 0.552: (0.513, 0.593)    | 3.040 / 0.023         | < 0.0001              | 0.570: (0.525, 0.618)   | 3.103 / 0.021         | < 0.0001              | 0.679: (0.629, 0.733)    |                       |                       |
| Ruggedness (# of peaks)                 | 7.879 / 0.036                           |                                         |                    | < 0.0001              | 0.752: (0.739, 0.766)    | 5.516 / 0.033         | < 0.0001              | 0.724: (0.709, 0.740)   | 15.020 / 0.088        | < 0.0001              | 0.838: (0.831, 0.845)    |                       |                       |
| De novo                                 | # Nodes in network                      |                                         | 46.292 / 0.177     | < 0.0001              | 0.835: (0.826, 0.844)    | 35.650 / 0.129        | < 0.0001              | 0.796: (0.783, 0.808)   | 46.251 / 0.199        | < 0.0001              | 0.844: (0.835, 0.854)    |                       |                       |
|                                         | # Accessible paths                      |                                         | 1.234 / 0.012      | < 0.0001              | 0.736: (0.673, 0.803)    | 1.196 / 0.011         | < 0.0001              | 0.686: (0.612, 0.766)   | 1.172 / 0.011         | < 0.0001              | 0.628: (0.559, 0.703)    |                       |                       |
|                                         | # Accessible paths / # nodes in network |                                         | 0.027 / 0.0002     | < 0.0001              | 1.908: (1.770, 2.061)    | 0.034 / 0.0003        | < 0.0001              | 1.764: (1.622, 1.922)   | 0.026 / 0.0002        | < 0.0001              | 1.818: (1.678, 1.972)    |                       |                       |
|                                         | Length of shortest accessible path      |                                         | 3.088 / 0.018      | < 0.0001              | 0.589: (0.553, 0.628)    | 3.029 / 0.018         | < 0.0001              | 0.555: (0.515, 0.597)   | 2.920 / 0.017         | < 0.0001              | 0.518: (0.477, 0.560)    |                       |                       |
|                                         | Ruggedness (# of peaks)                 |                                         | 8.381 / 0.034      | < 0.0001              | 0.806: (0.792, 0.819)    | 6.145 / 0.031         | < 0.0001              | 0.809: (0.792, 0.825)   | 15.615 / 0.079        | < 0.0001              | 0.836: (0.829, 0.843)    |                       |                       |
|                                         | SGV + Introgression                     |                                         | # Nodes in network | 56.559 / 0.272        | < 0.0001                 | 0.952: (0.945, 0.959) | 40.858 / 0.238        | < 0.0001                | 0.925: (0.915, 0.935) | 55.717 / 0.302        | < 0.0001                 | 0.950: (0.943, 0.957) |                       |
|                                         |                                         |                                         | # Accessible paths | 1.331 / 0.019         | 0.0199                   | 0.904: (0.831, 0.981) | 1.304 / 0.021         | 0.1646                  | 0.928: (0.835, 1.031) | 1.312 / 0.022         | 0.1469                   | 0.932: (0.850, 1.018) |                       |
| # Accessible paths / # nodes in network |                                         | 0.024 / 0.0003                          | < 0.0001           | 1.167: (1.089, 1.252) | 0.033 / 0.0005           | < 0.0001              | 1.270: (1.172, 1.379) | 0.024 / 0.0004          | < 0.0001              | 1.209: (1.121, 1.304) |                          |                       |                       |
| Length of shortest accessible path      |                                         | 3.415 / 0.026                           | < 0.0001           | 0.828: (0.777, 0.882) | 3.419 / 0.031            | < 0.0001              | 0.851: (0.793, 0.913) | 3.263 / 0.026           | < 0.0001              | 0.823: (0.763, 0.887) |                          |                       |                       |
| Ruggedness (# of peaks)                 |                                         | 9.319 / 0.036                           | < 0.0001           | 0.943: (0.928, 0.957) | 6.731 / 0.030            | < 0.0001              | 0.912: (0.895, 0.930) | 19.924 / 0.089          | < 0.0001              | 0.954: (0.948, 0.960) |                          |                       |                       |
| SGV + De novo                           | # Nodes in network                      | 56.723 / 0.214                          | < 0.0001           | 0.947: (0.941, 0.954) | 42.261 / 0.177           | < 0.0001              | 0.936: (0.926, 0.946) | 56.488 / 0.230          | < 0.0001              | 0.951: (0.943, 0.958) |                          |                       |                       |
|                                         | # Accessible paths                      | 1.344 / 0.019                           | 0.0522             | 0.931: (0.865, 1.001) | 1.287 / 0.018            | 0.0473                | 0.901: (0.816, 0.994) | 1.315 / 0.023           | 0.1632                | 0.949: (0.879, 1.021) |                          |                       |                       |
|                                         | # Accessible paths / # nodes in network | 0.024 / 0.0003                          | < 0.0001           | 1.155: (1.081, 1.235) | 0.031 / 0.0004           | 0.0017                | 1.128: (1.046, 1.218) | 0.024 / 0.0004          | 0.0004                | 1.134: (1.057, 1.218) |                          |                       |                       |
|                                         | Length of shortest accessible path      | 3.431 / 0.024                           | < 0.0001           | 0.842: (0.794, 0.892) | 3.391 / 0.027            | < 0.0001              | 0.834: (0.780, 0.891) | 3.299 / 0.023           | < 0.0001              | 0.859: (0.802, 0.920) |                          |                       |                       |
|                                         | Ruggedness (# of peaks)                 | 9.525 / 0.035                           | 0.0006             | 0.973: (0.958, 0.988) | 6.975 / 0.029            | 0.0006                | 0.967: (0.949, 0.986) | 19.849 / 0.085          | < 0.0001              | 0.950: (0.944, 0.956) |                          |                       |                       |
|                                         | SGV + De novo + Introgression           | # Nodes in network                      | 46.882 / 0.200     | < 0.0001              | 0.826: (0.816, 0.837)    | 31.000 / 0.177        | < 0.0001              | 0.722: (0.703, 0.739)   | 46.875 / 0.222        | < 0.0001              | 0.835: (0.823, 0.845)    |                       |                       |
|                                         |                                         | # Accessible paths                      | 1.322 / 0.019      | 0.0125                | 0.896: (0.824, 0.971)    | 1.268 / 0.018         | 0.0102                | 0.855: (0.762, 0.956)   | 1.247 / 0.018         | 0.0001                | 0.811: (0.726, 0.900)    |                       |                       |
|                                         |                                         | # Accessible paths / # nodes in network | 0.029 / 0.0004     | < 0.0001              | 1.879: (1.734, 2.041)    | 0.042 / 0.0006        | < 0.0001              | 2.798: (2.511, 3.128)   | 0.027 / 0.0004        | < 0.0001              | 1.785: (1.640, 1.948)    |                       |                       |
| Length of shortest accessible path      |                                         | 3.484 / 0.026                           | < 0.0001           | 0.876: (0.823, 0.932) | 3.444 / 0.029            | < 0.0001              | 0.861: (0.800, 0.925) | 3.221 / 0.024           | < 0.0001              | 0.775: (0.716, 0.838) |                          |                       |                       |
| Ruggedness (# of peaks)                 |                                         | 7.440 / 0.029                           | < 0.0001           | 0.650: (0.637, 0.664) | 4.555 / 0.025            | < 0.0001              | 0.485: (0.471, 0.500) | 12.933 / 0.062          | < 0.0001              | 0.725: (0.716, 0.734) |                          |                       |                       |

**Appendix 1—Table 19. Influence of different sources of adaptive genetic variation on accessibility of fitness paths separating either generalists from molluscivores, or generalists and scale-eaters using only samples from the second field experiment (Martin & Gould 2021).** Results for networks using all three measures of fitness (composite fitness, survival, and growth) are reported. Networks were constructed from random draws of five SNPs from either Standing genetic variation (SGV), introgression, or *de novo* mutations, as well as their combinations. Odds ratios were obtained by modelling the association between each accessibility measure and the source of genetic variation used to construct the fitness network, relative to networks constructed from standing variation. Thus, positive odds ratios imply that networks from standing variation have measures of accessibility that are smaller as compared to the alternative (e.g. introgression, *de novo* mutations, etc).

| Trajectory                    | Source                                  | Accessibility                           | Composite Fitness |                       |                          | Growth         |                       |                        | Survival       |                       |                         |
|-------------------------------|-----------------------------------------|-----------------------------------------|-------------------|-----------------------|--------------------------|----------------|-----------------------|------------------------|----------------|-----------------------|-------------------------|
|                               |                                         |                                         | Mean / SE         | LRT P-value           | Odds Ratio: (95% CI)     | Mean / SE      | LRT P-value           | Odds Ratio: (95% CI)   | Mean / SE      | LRT P-value           | Odds Ratio: (95% CI)    |
| Generalist to Molluscivore    | Introgression                           | # Nodes in network                      | 22.062 / 0.118    | < 0.0001              | 0.628: (0.608, 0.648)    | 17.632 / 0.099 | < 0.0001              | 0.556: (0.535, 0.577)  | 21.836 / 0.107 | < 0.0001              | 0.617: (0.596, 0.637)   |
|                               |                                         | # Accessible paths                      | 1.067 / 0.005     | < 0.0001              | 0.402: (0.341, 0.471)    | 1.107 / 0.008  | < 0.0001              | 0.721: (0.618, 0.836)  | 1.039 / 0.004  | < 0.0001              | 0.205: (0.167, 0.248)   |
|                               |                                         | # Accessible paths / # nodes in network | 0.052 / 0.0004    | < 0.0001              | 16.263: (14.350, 18.515) | 0.066 / 0.0006 | < 0.0001              | 9.411: (8.375, 10.617) | 0.051 / 0.0003 | < 0.0001              | 10.698: (9.642, 11.907) |
|                               |                                         | Length of shortest accessible path      | 2.483 / 0.013     | < 0.0001              | 0.751: (0.700, 0.804)    | 2.465 / 0.016  | 0.7601                | 0.987: (0.908, 1.073)  | 2.473 / 0.013  | < 0.0001              | 0.652: (0.610, 0.695)   |
|                               |                                         | Ruggedness (# of peaks)                 | 1.437 / 0.025     | < 0.0001              | 0.247: (0.230, 0.264)    | 0.702 / 0.018  | < 0.0001              | 0.257: (0.238, 0.276)  | 1.853 / 0.033  | < 0.0001              | 0.405: (0.386, 0.425)   |
|                               | SGV + Introgression                     | # Nodes in network                      | 32.301 / 0.146    | < 0.0001              | 0.824: (0.818, 0.831)    | 23.042 / 0.103 | < 0.0001              | 0.769: (0.760, 0.779)  | 32.488 / 0.144 | < 0.0001              | 0.826: (0.819, 0.832)   |
|                               |                                         | # Accessible paths                      | 1.134 / 0.007     | < 0.0001              | 0.753: (0.681, 0.832)    | 1.115 / 0.007  | < 0.0001              | 0.778: (0.693, 0.871)  | 1.146 / 0.008  | < 0.0001              | 0.664: (0.609, 0.723)   |
|                               |                                         | # Accessible paths / # nodes in network | 0.037 / 0.0002    | < 0.0001              | 3.929: (3.671, 4.210)    | 0.051 / 0.0003 | < 0.0001              | 3.505: (3.267, 3.765)  | 0.037 / 0.0002 | < 0.0001              | 3.053: (2.874, 3.245)   |
|                               |                                         | Length of shortest accessible path      | 2.538 / 0.012     | < 0.0001              | 0.842: (0.793, 0.893)    | 2.426 / 0.011  | 0.0136                | 0.907: (0.846, 0.974)  | 2.597 / 0.013  | < 0.0001              | 0.819: (0.777, 0.863)   |
|                               |                                         | Ruggedness (# of peaks)                 | 3.954 / 0.034     | < 0.0001              | 0.518: (0.504, 0.532)    | 2.243 / 0.028  | < 0.0001              | 0.560: (0.542, 0.577)  | 5.742 / 0.056  | < 0.0001              | 0.690: (0.680, 0.700)   |
| Generalist to Scale-eater     | Introgression                           | # Nodes in network                      | 45.775 / 0.254    | < 0.0001              | 0.864: (0.855, 0.872)    | 33.658 / 0.219 | < 0.0001              | 0.837: (0.826, 0.849)  | 45.306 / 0.264 | < 0.0001              | 0.862: (0.853, 0.870)   |
|                               |                                         | # Accessible paths                      | 1.202 / 0.013     | < 0.0001              | 0.723: (0.647, 0.803)    | 1.180 / 0.013  | < 0.0001              | 0.733: (0.639, 0.835)  | 1.208 / 0.013  | < 0.0001              | 0.743: (0.661, 0.830)   |
|                               |                                         | # Accessible paths / # nodes in network | 0.027 / 0.0003    | < 0.0001              | 1.959: (1.809, 2.125)    | 0.037 / 0.0004 | < 0.0001              | 2.243: (2.038, 2.476)  | 0.028 / 0.0003 | < 0.0001              | 2.087: (1.916, 2.279)   |
|                               |                                         | Length of shortest accessible path      | 3.108 / 0.022     | < 0.0001              | 0.605: (0.564, 0.648)    | 3.063 / 0.022  | < 0.0001              | 0.568: (0.523, 0.615)  | 3.132 / 0.022  | < 0.0001              | 0.713: (0.662, 0.768)   |
|                               |                                         | Ruggedness (# of peaks)                 | 7.928 / 0.036     | < 0.0001              | 0.760: (0.747, 0.773)    | 5.572 / 0.033  | < 0.0001              | 0.727: (0.712, 0.743)  | 15.072 / 0.087 | < 0.0001              | 0.838: (0.831, 0.845)   |
|                               | De novo                                 | # Nodes in network                      | 46.510 / 0.177    | < 0.0001              | 0.843: (0.834, 0.851)    | 35.882 / 0.129 | < 0.0001              | 0.808: (0.796, 0.820)  | 46.454 / 0.196 | < 0.0001              | 0.843: (0.833, 0.852)   |
|                               |                                         | # Accessible paths                      | 1.223 / 0.011     | < 0.0001              | 0.775: (0.708, 0.846)    | 1.202 / 0.011  | 0.0002                | 0.806: (0.723, 0.896)  | 1.168 / 0.010  | < 0.0001              | 0.639: (0.566, 0.717)   |
|                               |                                         | # Accessible paths / # nodes in network | 0.027 / 0.0002    | < 0.0001              | 2.010: (1.861, 2.176)    | 0.034 / 0.0003 | < 0.0001              | 1.934: (1.768, 2.121)  | 0.026 / 0.0002 | < 0.0001              | 1.874: (1.730, 2.034)   |
|                               |                                         | Length of shortest accessible path      | 3.100 / 0.018     | < 0.0001              | 0.602: (0.566, 0.640)    | 3.049 / 0.018  | < 0.0001              | 0.564: (0.524, 0.605)  | 2.935 / 0.017  | < 0.0001              | 0.553: (0.512, 0.596)   |
|                               |                                         | Ruggedness (# of peaks)                 | 8.336 / 0.034     | < 0.0001              | 0.798: (0.784, 0.812)    | 6.147 / 0.030  | < 0.0001              | 0.803: (0.787, 0.820)  | 15.630 / 0.079 | < 0.0001              | 0.837: (0.830, 0.844)   |
| SGV + Introgression           | # Nodes in network                      | 56.208 / 0.268                          | < 0.0001          | 0.952: (0.946, 0.959) | 41.204 / 0.243           | < 0.0001       | 0.937: (0.928, 0.947) | 55.697 / 0.277         | < 0.0001       | 0.948: (0.940, 0.955) |                         |
|                               | # Accessible paths                      | 1.339 / 0.021                           | 0.6195            | 0.980: (0.907, 1.060) | 1.285 / 0.020            | 0.922          | 0.985: (0.885, 1.097) | 1.307 / 0.020          | 0.256          | 0.946: (0.866, 1.031) |                         |
|                               | # Accessible paths / # nodes in network | 0.024 / 0.0004                          | < 0.0001          | 1.234: (1.151, 1.325) | 0.032 / 0.0005           | < 0.0001       | 1.299: (1.196, 1.413) | 0.024 / 0.0004         | < 0.0001       | 1.231: (1.144, 1.327) |                         |
|                               | Length of shortest accessible path      | 3.465 / 0.026                           | < 0.0001          | 0.860: (0.809, 0.914) | 3.460 / 0.030            | < 0.0001       | 0.860: (0.802, 0.922) | 3.306 / 0.025          | 0.0001         | 0.867: (0.807, 0.932) |                         |
|                               | Ruggedness (# of peaks)                 | 9.231 / 0.036                           | < 0.0001          | 0.930: (0.915, 0.944) | 6.666 / 0.030            | < 0.0001       | 0.902: (0.885, 0.920) | 19.815 / 0.090         | < 0.0001       | 0.951: (0.945, 0.957) |                         |
| SGV + De novo                 | # Nodes in network                      | 56.259 / 0.212                          | < 0.0001          | 0.947: (0.940, 0.953) | 41.991 / 0.173           | < 0.0001       | 0.936: (0.925, 0.946) | 56.339 / 0.224         | < 0.0001       | 0.949: (0.942, 0.956) |                         |
|                               | # Accessible paths                      | 1.329 / 0.017                           | 0.4575            | 0.966: (0.895, 1.042) | 1.290 / 0.020            | 0.922          | 0.995: (0.905, 1.097) | 1.329 / 0.018          | 0.5596         | 0.976: (0.900, 1.059) |                         |
|                               | # Accessible paths / # nodes in network | 0.024 / 0.0003                          | < 0.0001          | 1.233: (1.153, 1.319) | 0.031 / 0.0004           | < 0.0001       | 1.225: (1.133, 1.326) | 0.024 / 0.0003         | < 0.0001       | 1.243: (1.158, 1.335) |                         |
|                               | Length of shortest accessible path      | 3.452 / 0.023                           | < 0.0001          | 0.851: (0.803, 0.902) | 3.379 / 0.025            | < 0.0001       | 0.800: (0.748, 0.856) | 3.288 / 0.022          | < 0.0001       | 0.852: (0.797, 0.912) |                         |
|                               | Ruggedness (# of peaks)                 | 9.406 / 0.035                           | < 0.0001          | 0.953: (0.938, 0.968) | 6.898 / 0.029            | < 0.0001       | 0.948: (0.930, 0.966) | 19.782 / 0.084         | < 0.0001       | 0.947: (0.941, 0.953) |                         |
| SGV + De novo + Introgression | # Nodes in network                      | 47.220 / 0.207                          | < 0.0001          | 0.841: (0.831, 0.851) | 31.051 / 0.183           | < 0.0001       | 0.740: (0.723, 0.757) | 47.117 / 0.224         | < 0.0001       | 0.840: (0.829, 0.850) |                         |
|                               | # Accessible paths                      | 1.298 / 0.018                           | 0.074             | 0.918: (0.842, 0.998) | 1.289 / 0.022            | 0.922          | 0.994: (0.894, 1.104) | 1.221 / 0.016          | < 0.0001       | 0.790: (0.705, 0.879) |                         |
|                               | # Accessible paths / # nodes in network | 0.028 / 0.0004                          | < 0.0001          | 1.945: (1.792, 2.116) | 0.043 / 0.0007           | < 0.0001       | 3.307: (2.936, 3.741) | 0.027 / 0.0004         | < 0.0001       | 1.784: (1.639, 1.946) |                         |
|                               | Length of shortest accessible path      | 3.497 / 0.025                           | < 0.0001          | 0.879: (0.827, 0.935) | 3.479 / 0.030            | 0.0001         | 0.869: (0.809, 0.933) | 3.269 / 0.024          | < 0.0001       | 0.826: (0.766, 0.891) |                         |
|                               | Ruggedness (# of peaks)                 | 7.361 / 0.031                           | < 0.0001          | 0.650: (0.637, 0.664) | 4.530 / 0.026            | < 0.0001       | 0.490: (0.475, 0.504) | 12.869 / 0.062         | < 0.0001       | 0.725: (0.716, 0.734) |                         |
